# Supplementary material
Source: PubMed Central journal article supplement (PMC4331779)
Supplement: acel0013-0206-sd1.pdf [file acel0013-0206-sd1.pdf]

**Supplementary Fig. 1**

**Lifespan-extending compounds can show structural similarity or have common substructures.**

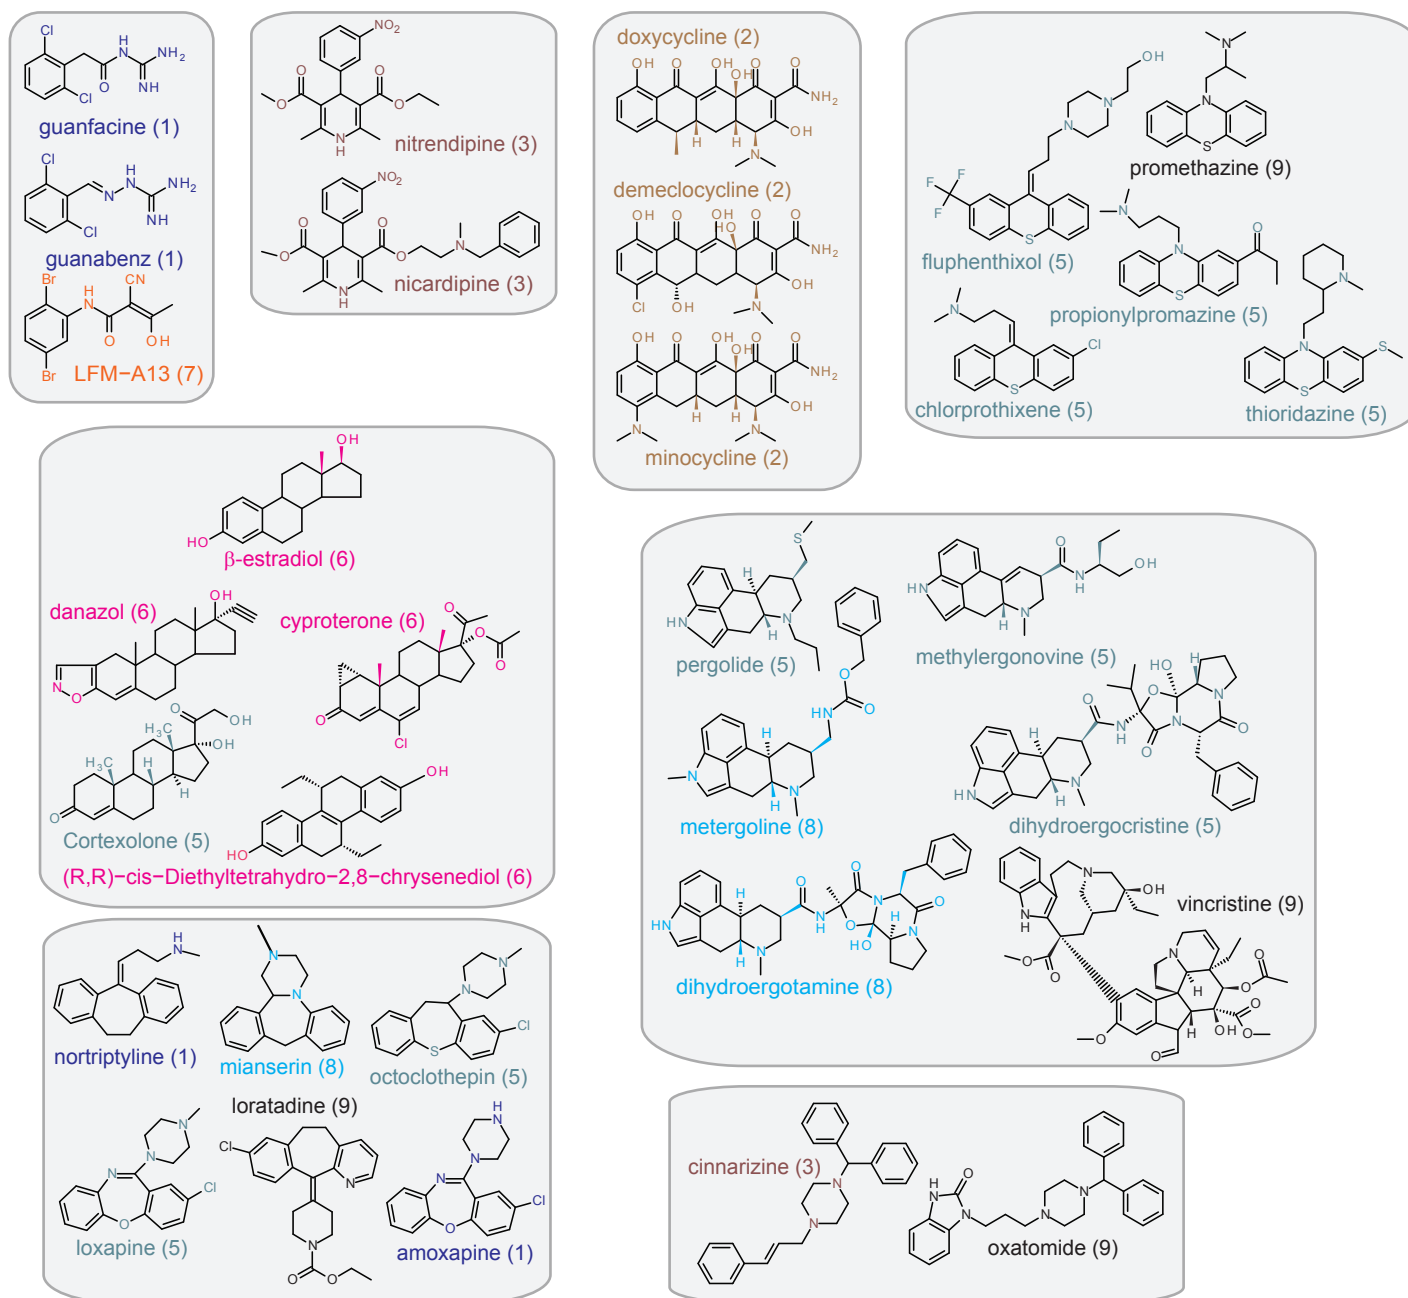

Adrenoceptor (1) Antibiotic (2) Ca<sup>2+</sup> Channel (3) Cyclic Nucleotide (4)

Dopamine (5) Hormone (6) Phosphorylation (7) Serotonin (8) Other (9)

**Supplementary Fig. 1. Lifespan-extending compounds show structural similarity or have common substructures.** Names of the compounds are color coded and numbered according to pharmacological class, as indicated.

**Supplementary Fig. 2. Structures of lifespan-extending compounds and their effects on stress resistance.**

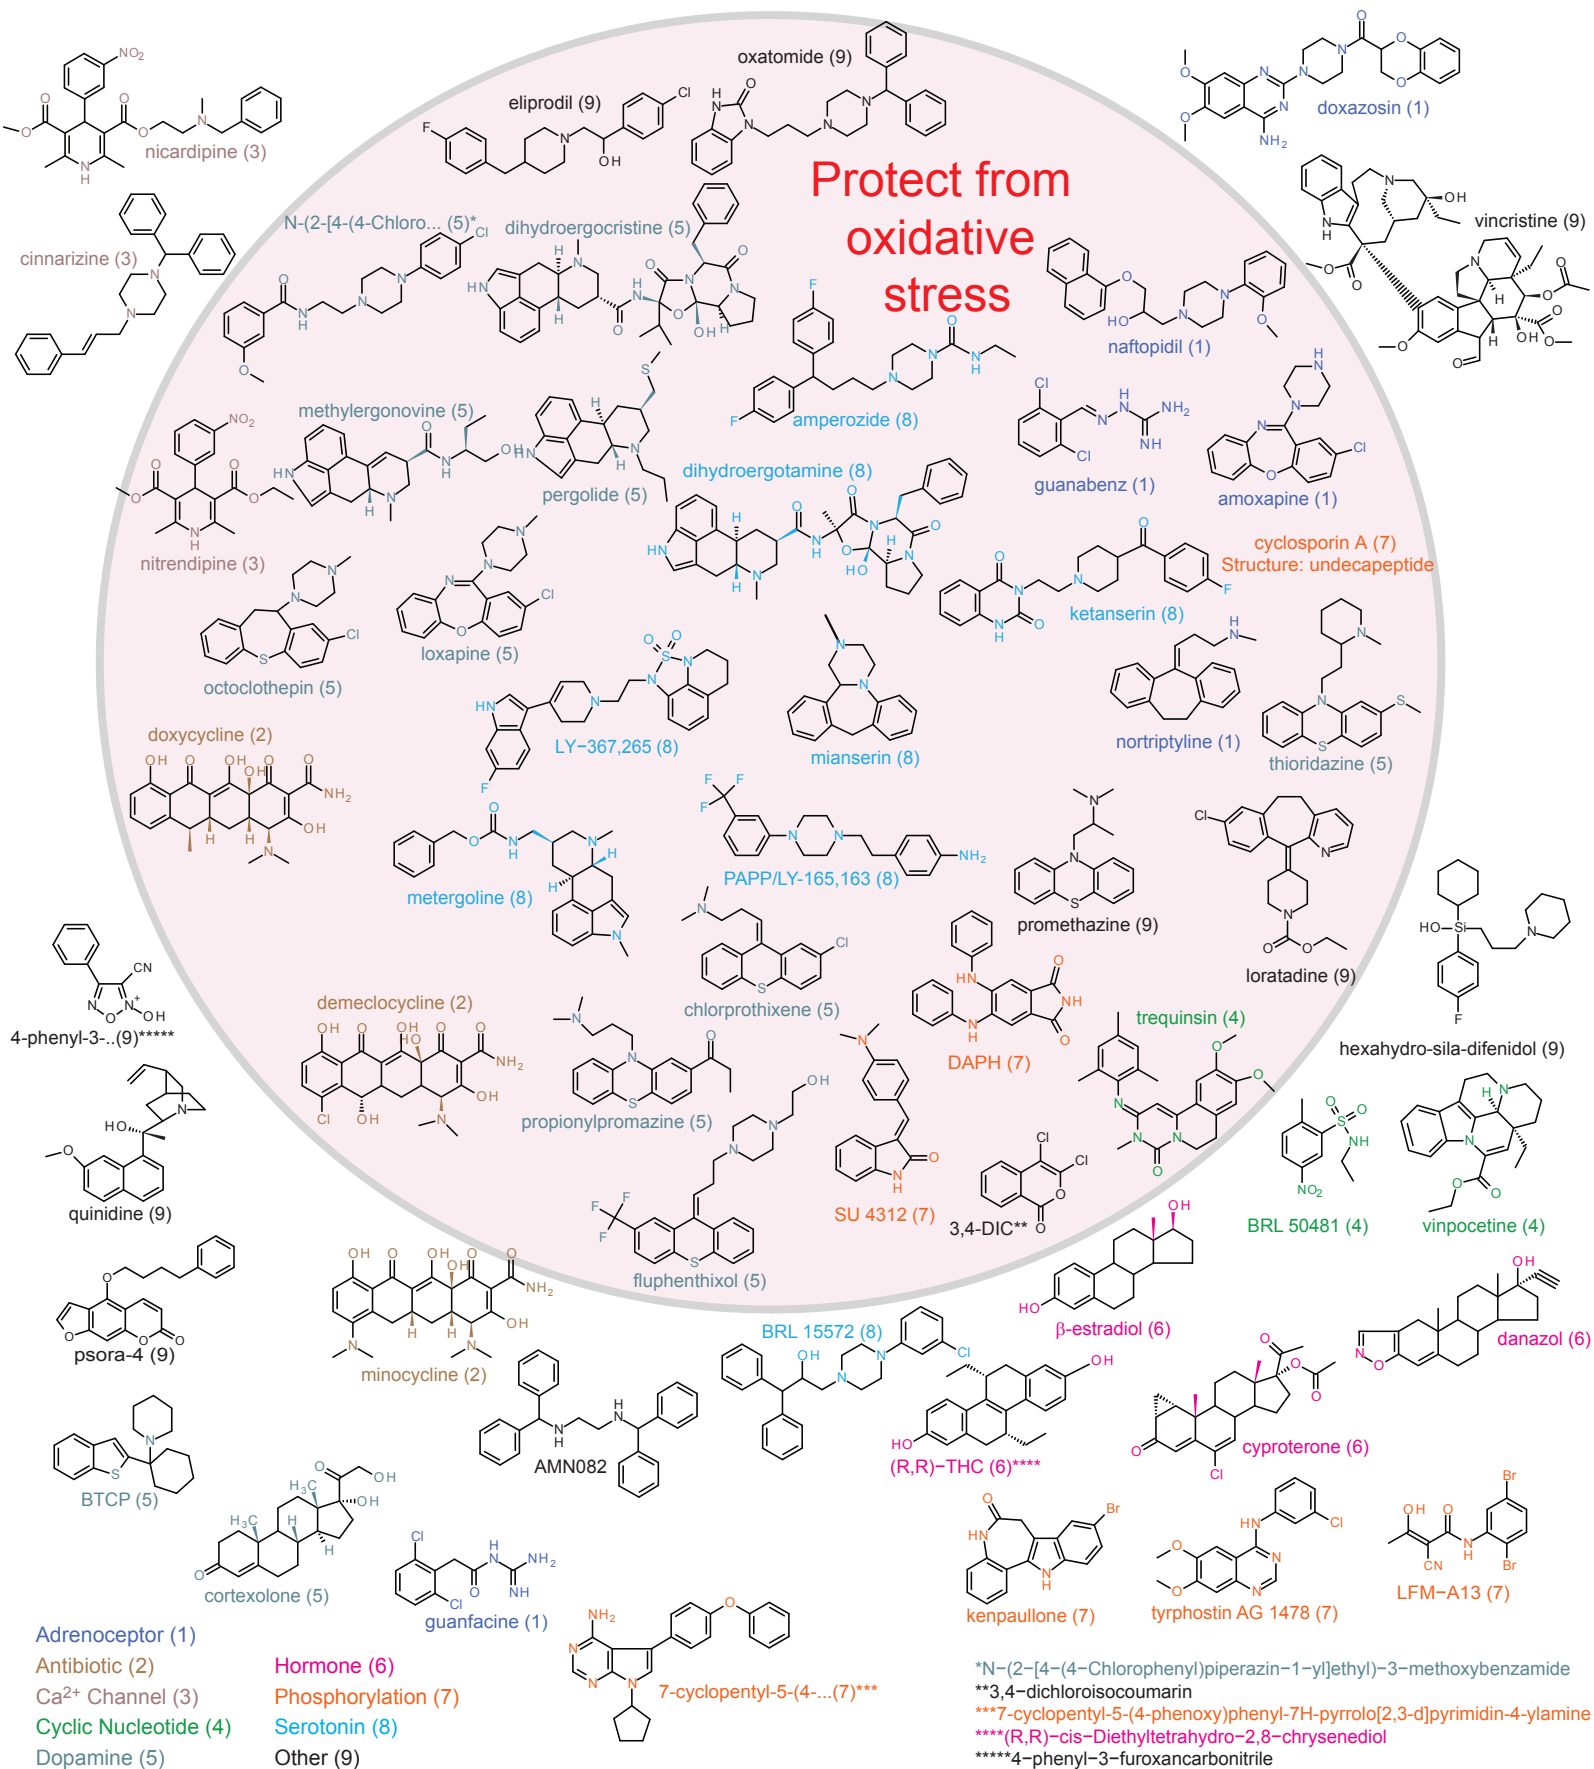

**Supplementary Fig. 2. Structures of lifespan-extending compounds and their effects on stress resistance.**

Structures are shown for compounds that increased *C. elegans* lifespan. Compounds in the red circle increased oxidative stress resistance in *C. elegans*. Names of compounds are color coded and numbered according to pharmacological class, as indicated. Full names for compounds marked by asterisks are shown at lower left.

**Supplementary Fig. 3.**  
**Dose response curves for lifespan- extending compounds**

**Adrenoceptor Class**

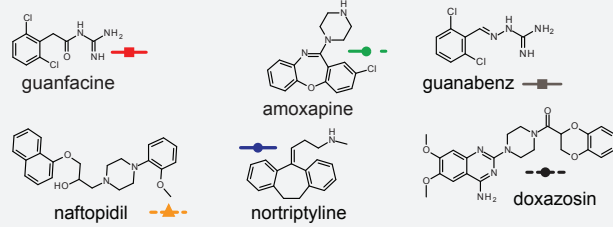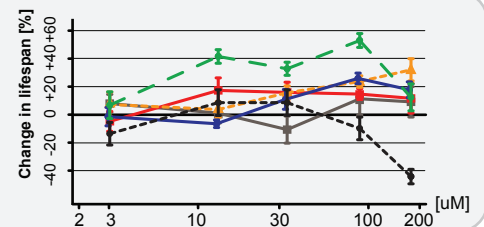

**Dopamine Class**

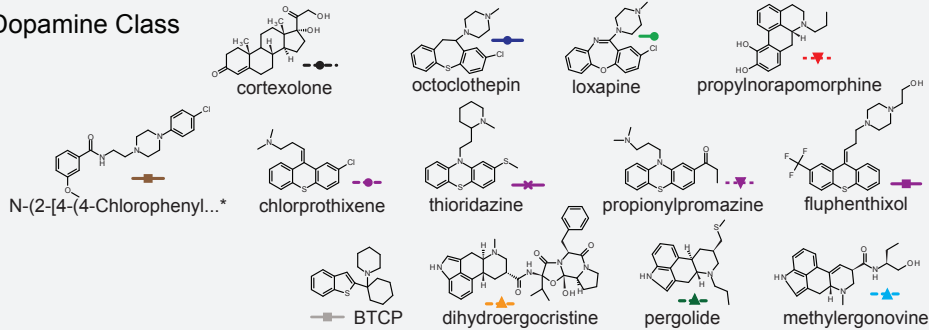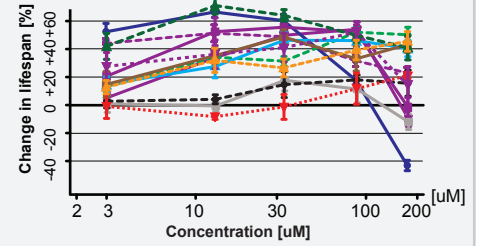

**Serotonin Class**

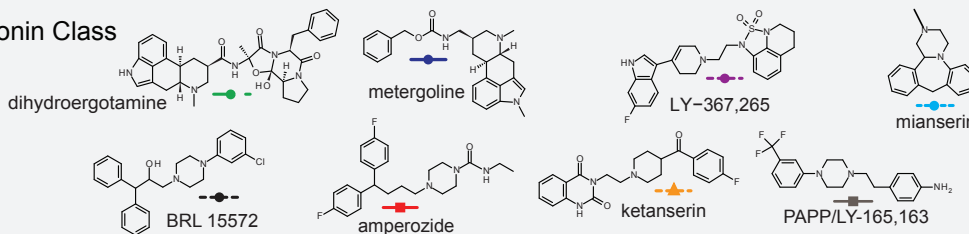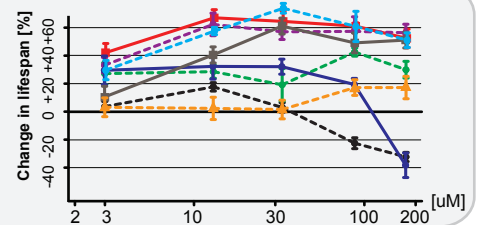

**Phosphorylation Class**

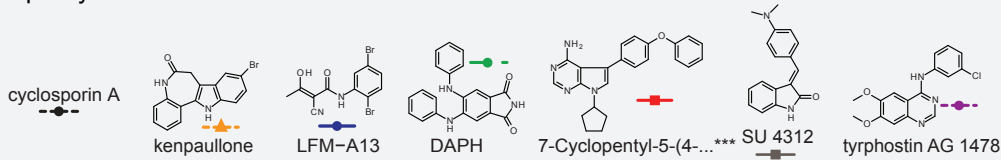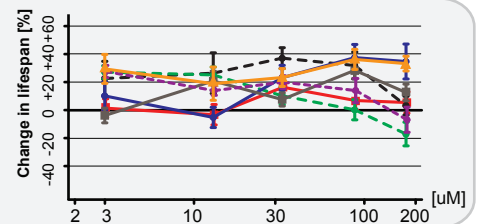

**Hormone Class**

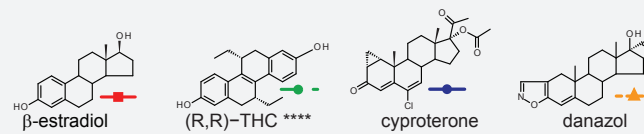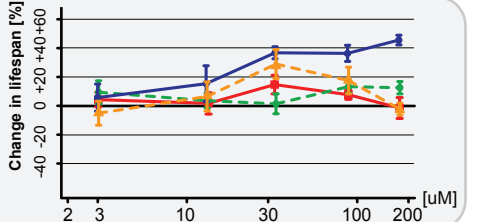

**Ca2+ Channel Class**

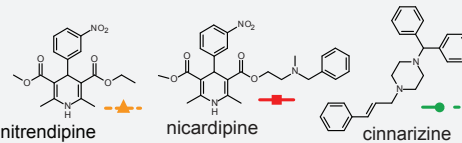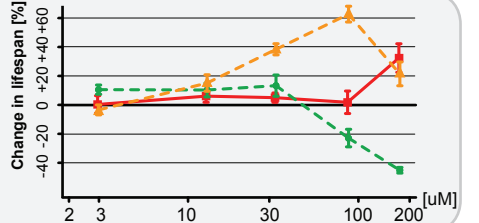

**Antibiotic Class**

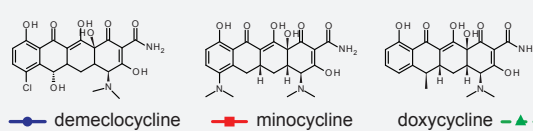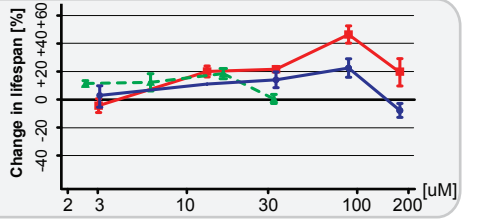

**Cyclic Nucleotides Class**

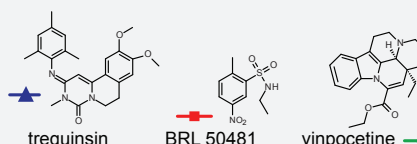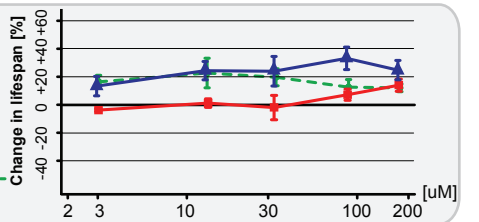

**Supplementary Fig. 3.**  
**Dose response curves for lifespan- extending compounds.** Graphs show percent increase in lifespan compared to vehicle control (DMSO) as a function of compound concentration [uM]. Data points indicate means of different experimental populations and error bars indicate S.E.M.. Results obtained with the compounds at left are shown in different colors, as indicated. Each compound produced a significant lifespan increase at two or more concentrations ( $p < 0.05$ ).

\*N-(2-[4-(4-Chlorophenyl)piperazin-1-yl]ethyl)-3-methoxybenzamide  
 \*\*3,4-Dichloroisocoumarin  
 \*\*\*7-Cyclopentyl-5-(4-phenoxy)phenyl-7H-pyrrolo[2,3-d]pyrimidin-4-ylamine  
 \*\*\*\*(R,R)-cis-Diethyltetrahydro-2,8-chrysenediol  
 \*\*\*\*\*4-Phenyl-3-furoxan carbonitrile

## Supplementary Fig. 4 Effects of lifespan-extending compounds on bacterial growth

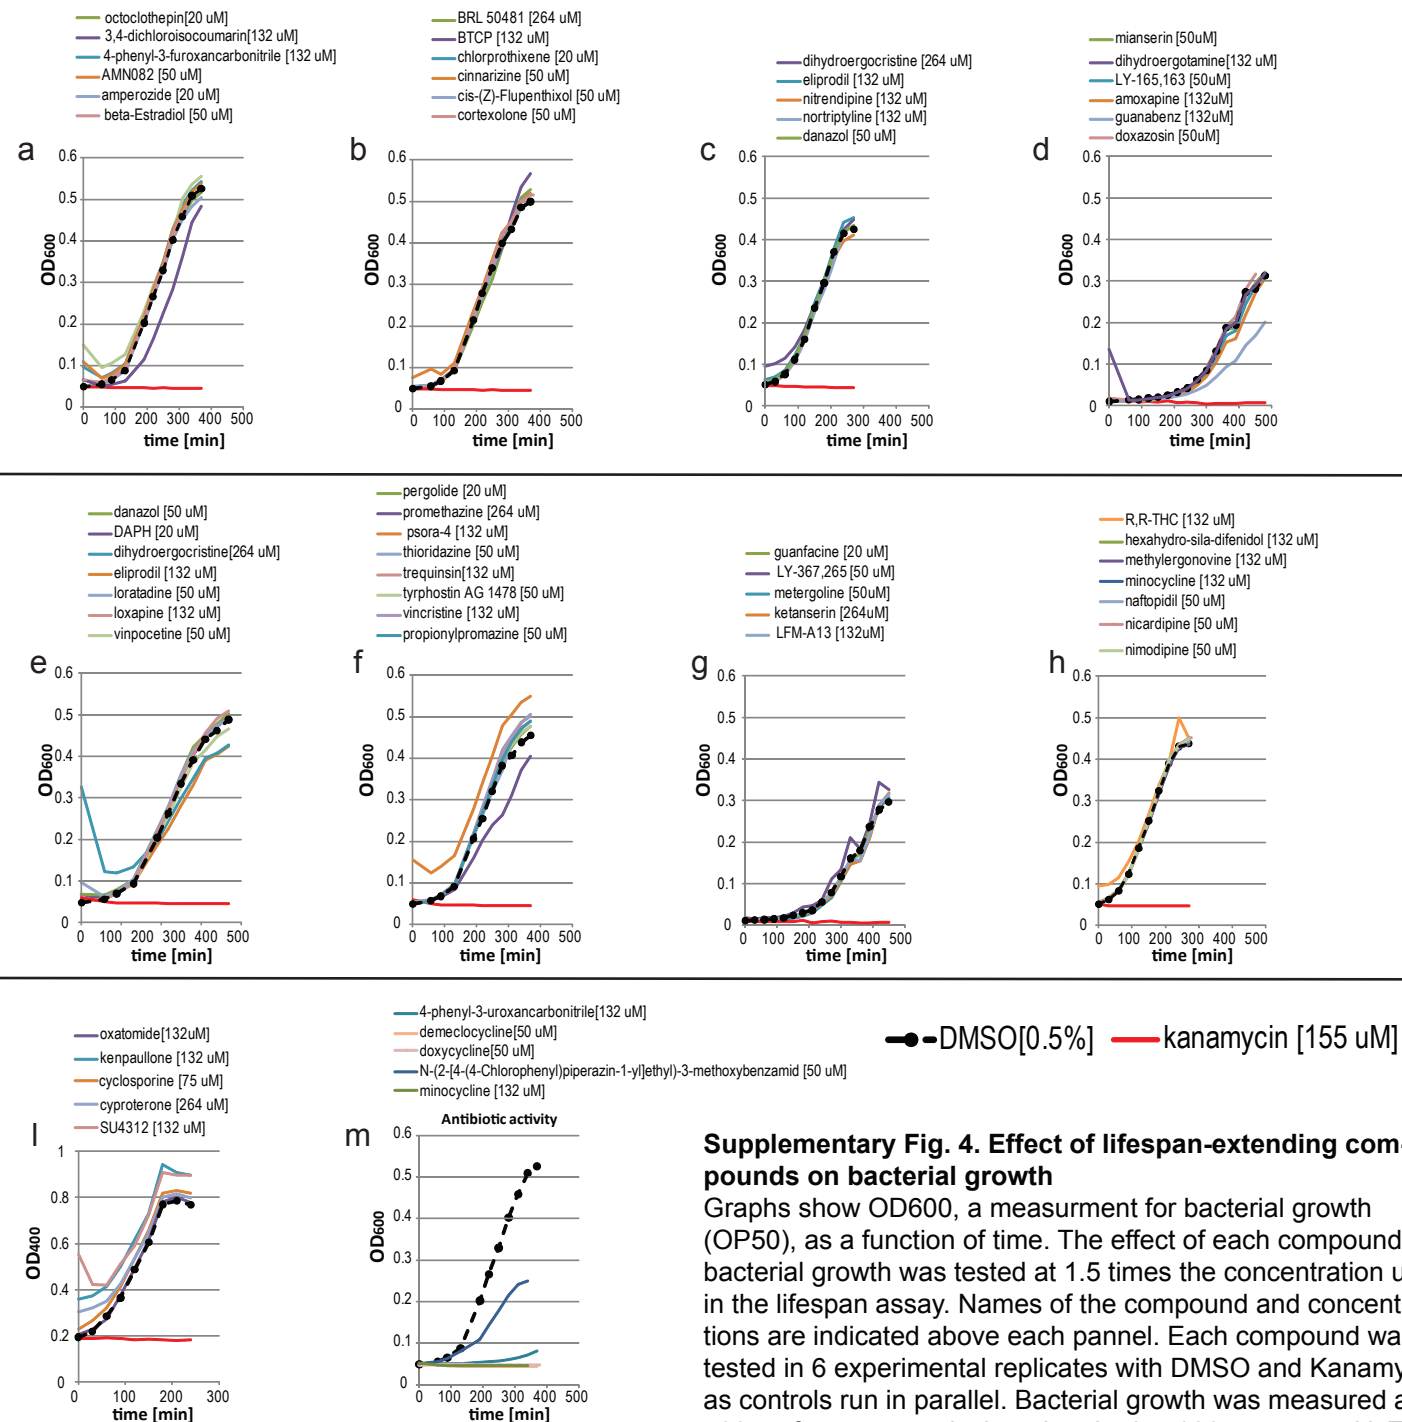

### Supplementary Fig. 4. Effect of lifespan-extending compounds on bacterial growth

Graphs show OD<sub>600</sub>, a measurement for bacterial growth (OP50), as a function of time. The effect of each compound on bacterial growth was tested at 1.5 times the concentration used in the lifespan assay. Names of the compound and concentrations are indicated above each panel. Each compound was tested in 6 experimental replicates with DMSO and Kanamycin as controls run in parallel. Bacterial growth was measured at 400nm for compounds that absorbed at 600nm, panel i. The five compounds that were found to inhibit bacterial growth were retested in parallel, shown in panel m.

## Supplementary Methods

### Generation of a parametric survival-time model

To be able to better interpret the outcome of our screen, we generated a parametric survival-time model describing the survival of DMSO-treated control animals. As the basis of our model, we used the Gompertz equation. Using this survival-time model we generated artificial datasets using Monte Carlo simulations. These datasets were then analyzed using our primary hit criteria to estimate our ability to detect different percent changes in lifespan.

Definitions:

T: non-negative random variable denoting the time to a failure event

F(t): cumulative distribution function:  $F(t) = \Pr(T \leq t)$

S(t): survivor function:  $S(t) = \Pr(T > t) = 1 - F(t)$  and for  $S(0) = 1$

Gompertz equation:  $h(t) = A * e^{\gamma t}$

Equations:

$$(1) h(t) = f(t)/S(t)$$

$$(2) F(t)' = f(t)$$

$$(3) F(t) = 1 - S(t) \Rightarrow F(t)' = f(t) = -S(t)'$$

$$(4) h(t) = -S(t)'/S(t)$$

$$(5) H(t) = \int_0^t h(t) = \int_0^t -S(u)'/S(u) du = -\ln(S(t))$$

$$(6) S(t) = \exp(-H(t))$$

$$(7) F(t) = 1 - e^{-H(t)}$$

$$(8) f(t) = h(t) * e^{-H(t)}$$

$$(9) H(t) = \int_0^t A * e^{-\gamma u} du \quad [H(t) \text{ for the Gompertz equation}]$$

$$(10) H(t) = \left(\frac{A}{\gamma}\right) * (e^{\gamma t} - 1)$$

$$(11) S(t) = e^{-\left(\frac{A}{\gamma}\right) * (e^{\gamma t} - 1)}$$

$$(12) f(t) = A * e^{\gamma t} * e^{-\left(\frac{A}{\gamma}\right) * (e^{\gamma t} - 1)}$$

$$(13) F(t) = 1 - e^{-\left(\frac{A}{\gamma}\right) * (e^{\gamma t} - 1)}$$

$$(14) Q(u) = F(u)^{-1}$$

$$(15) \ln(1 - F) = -\left(\frac{A}{\gamma}\right) * (e^{\gamma t} - 1)$$

$$(16) \left(\frac{\gamma}{A}\right) \ln(1 - F) = 1 - e^{\gamma t}$$

$$(17) Q(u) = t = \left(\frac{1}{\gamma}\right) * \ln\left(1 - \left(\frac{\gamma}{A}\right) * \ln(1 - u)\right) \quad [Q(u) \text{ for Gompertz equation}]$$

Maximum likelihood estimation was performed using the STATA `streg` command as described in (1) to estimate the parameter  $\gamma$  from our DMSO control population survival-time data. Using the obtained estimate for  $\gamma$  we generated a parametric regression survival-time model for DMSO control animals (Supplementary Fig. 5, 6)

To simulate the death times for control and drug -treated animals, the quantile function, defined as the inverse of the cumulative distribution (14) for the Gompertz was obtained (17). Modulation of parameter  $A$  was used to model populations with lifespans greater than those of DMSO-treated animals. The quantile function (17) was then used for Monte Carlo simulations to generate artificial datasets of DMSO-treated, control, and long-lived populations. Population sizes used for the simulation were 30, 41 and 58 animals.

Using the logrank test (Mantel Haenzel), we analyzed these data-sets (Supplementary Fig. 7) (100,000 repetitions) to estimate the percentage of times we would be able to detect a given percent increase in lifespan using our criteria for a primary hit ( $\alpha=0.05$ ).

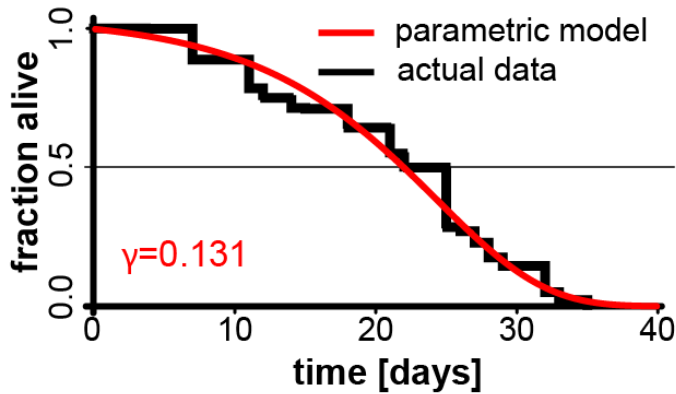

**Supplementary Fig. 5: Parametric survival-time model based on the Gompertz equation**

Maximum likelihood estimation was performed to generate a parametric regression survival-time model. The parameter  $\gamma$  was estimated from our DMSO control population survival-time data ( $\gamma=0.131$ ). Fraction of animals alive is plotted as a function of time in days for the parametric model (red) and the actual data from the screen (black).

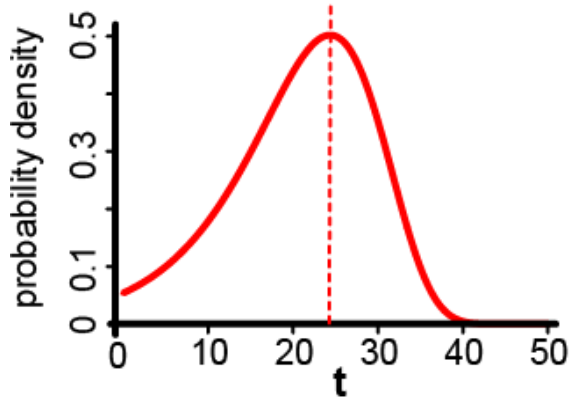

**Supplementary Fig. 6: Density function  $f(t)$**

The graph plots the probability density of survival as a function of time ( $t$ ) in days. The parameters for the equation were derived using DMSO control population survival time data. As can be seen, the distribution of survival times differs markedly from a normal distribution.

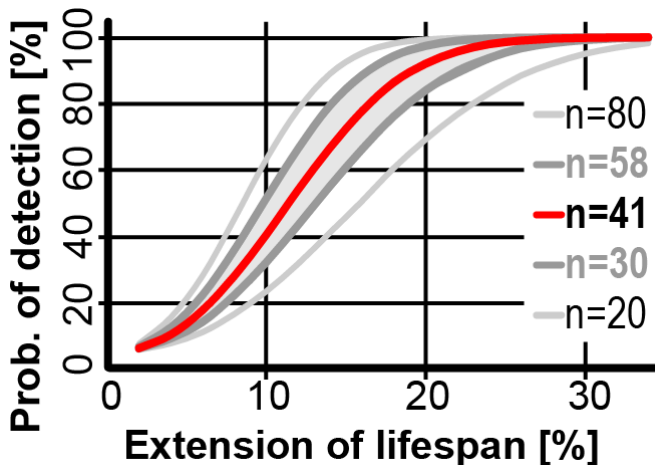

**Supplementary Fig. 7: Probability of detecting % increases in lifespan**

Fig.3 shows the chance of detecting a compound as a function of the percent increase in lifespan it causes using the indicated number of animals ( $n$ ) in the screen. The mean number of animals used for each compound in our screen was 41. Over 90% of the compound-treated populations contained from 30 to 58 animals.

1. M. Cleves, W. Gould, R. Gutierrez, Eds., *An Introduction to Survival Analysis Using STATA*, (ed. revised edition, 2004), revised edition.

**Supplementary Table 1.**  
**Results of primary screen**

\* was tested a second time even though it was not in the top 156 performing compounds

\*\* was identified to extend lifespan twice independently

FDR: False Discovery Rate

| Class     | Drug name                                          | No. of animals | Percent change in [%] lifespan | Mean lifespan[days] | re-tested | Final hit | P-value | FDR   |
|-----------|----------------------------------------------------|----------------|--------------------------------|---------------------|-----------|-----------|---------|-------|
| Adenosine | (S)-ENBA                                           | 39             | 0                              | 20.2                | no        | no        | 0.760   | 0.997 |
| Adenosine | 1,3-Dimethyl-8-phenylxanthine                      | 46             | -4                             | 20.2                | no        | no        | 0.681   | 0.997 |
| Adenosine | 1,3-Dipropyl-7-methylxanthine                      | 39             | 0                              | 20.9                | no        | no        | 0.577   | 0.997 |
| Adenosine | 1,3-Dipropyl-8-p-sulfophenylxanthine               | 39             | -3                             | 21.3                | no        | no        | 0.826   | 0.997 |
| Adenosine | 1,7-Dimethylxanthine                               | 36             | 4                              | 22.4                | no        | no        | 0.738   | 0.997 |
| Adenosine | 1-Allyl-3,7-dimethyl-8-p-sulfophenylxanthine       | 40             | -2                             | 21.4                | no        | no        | 0.933   | 0.997 |
| Adenosine | 2-Chloroadenosine                                  | 21             | 19                             | 25.8                | no        | no        | 0.317   | 0.897 |
| Adenosine | 2-Phenylaminoadenosine                             | 38             | 18                             | 24.3                | yes       | no        | 0.024   | 0.235 |
| Adenosine | 3,7-Dimethyl-1-propargylxanthine                   | 46             | -15                            | 17.9                | no        | no        | 0.078   | 0.492 |
| Adenosine | 3-Isobutyl-1-methylxanthine                        | 42             | -8                             | 19.0                | no        | no        | 0.269   | 0.834 |
| Adenosine | 3-n-Propylxanthine                                 | 42             | 2                              | 21.5                | no        | no        | 0.752   | 0.997 |
| Adenosine | 5'-N-Ethylcarboxamidoadenosine                     | 34             | -5                             | 19.9                | no        | no        | 0.467   | 0.995 |
| Adenosine | 5'-N-Methyl carboxamidoadenosine                   | 37             | -2                             | 21.4                | no        | no        | 0.823   | 0.997 |
| Adenosine | 7-Chloro-4-hydroxy-2-phenyl-1,8-naphthyridine      | 27             | 7                              | 23.3                | no        | no        | 0.539   | 0.997 |
| Adenosine | 8-(3-Chlorostyryl)caffeine                         | 35             | 0                              | 21.3                | no        | no        | 0.649   | 0.997 |
| Adenosine | 8-(p-Sulfophenyl)theophylline                      | 39             | -1                             | 21.7                | no        | no        | 0.958   | 0.997 |
| Adenosine | 8-Cyclopentyl-1,3-dimethylxanthine                 | 42             | 0                              | 21.3                | no        | no        | 0.757   | 0.997 |
| Adenosine | 8-Cyclopentyl-1,3-dipropylxanthine                 | 43             | -1                             | 21.3                | no        | no        | 0.829   | 0.997 |
| Adenosine | AB-MECA                                            | 39             | 10                             | 24.2                | no        | no        | 0.503   | 0.996 |
| Adenosine | Adenosine                                          | 28             | 5                              | 22.9                | no        | no        | 0.945   | 0.997 |
| Adenosine | Alloxazine                                         | 41             | -4                             | 21.0                | no        | no        | 0.429   | 0.977 |
| Adenosine | Aminophylline ethylenediamine                      | 38             | 1                              | 22.9                | no        | no        | 0.900   | 0.997 |
| Adenosine | Caffeine                                           | 44             | -2                             | 21.3                | no        | no        | 0.709   | 0.997 |
| Adenosine | CGS-15943                                          | 38             | -5                             | 20.4                | no        | no        | 0.916   | 0.997 |
| Adenosine | CGS-21680 hydrochloride                            | 46             | -3                             | 20.9                | no        | no        | 0.884   | 0.997 |
| Adenosine | Chloro-IB-MECA                                     | 44             | -10                            | 19.3                | no        | no        | 0.500   | 0.996 |
| Adenosine | Dilazep hydrochloride                              | 36             | 9                              | 23.3                | no        | no        | 0.311   | 0.893 |
| Adenosine | Dipyridamole                                       | 41             | -10                            | 18.9                | no        | no        | 0.276   | 0.843 |
| Adenosine | erythro-9-(2-Hydroxy-3-nonyl)adenine hydrochloride | 31             | 13                             | 22.9                | no        | no        | 0.609   | 0.997 |
| Adenosine | Etazolate hydrochloride                            | 45             | -7                             | 19.4                | no        | no        | 0.489   | 0.996 |
| Adenosine | FSCPX                                              | 26             | 18                             | 23.8                | no        | no        | 0.189   | 0.743 |
| Adenosine | GR 79236X                                          | 41             | 3                              | 22.3                | no        | no        | 0.910   | 0.997 |
| Adenosine | HE-NECA                                            | 42             | 16                             | 23.1                | yes       | no        | 0.099   | 0.560 |
| Adenosine | IB-MECA                                            | 37             | -18                            | 17.0                | no        | no        | 0.172   | 0.717 |
| Adenosine | Metrifudil                                         | 49             | 1                              | 21.4                | no        | no        | 0.662   | 0.997 |
| Adenosine | MRS 1523                                           | 31             | 4                              | 21.4                | no        | no        | 0.503   | 0.996 |
| Adenosine | MRS 1754                                           | 41             | 4                              | 21.4                | no        | no        | 0.844   | 0.997 |

|              |                                      |    |     |      |     |     |       |       |
|--------------|--------------------------------------|----|-----|------|-----|-----|-------|-------|
| Adenosine    | MRS 2211 sodium salt hydrate         | 35 | 2   | 22.3 | no  | no  | 0.980 | 0.997 |
| Adenosine    | N6-2-(4-Aminophenyl)ethyladenosine   | 33 | -4  | 21.0 | no  | no  | 0.671 | 0.997 |
| Adenosine    | N6-2-Phenylethyladenosine            | 35 | 5   | 21.6 | no  | no  | 0.393 | 0.951 |
| Adenosine    | N6-Cyclohexyladenosine               | 45 | -4  | 20.6 | no  | no  | 0.979 | 0.997 |
| Adenosine    | N6-Cyclopentyl-9-methyladenine       | 42 | 11  | 23.5 | no  | no* | 0.153 | 0.681 |
| Adenosine    | N6-Cyclopentyladenosine              | 40 | 26  | 27.4 | yes | no  | 0.023 | 0.232 |
| Adenosine    | N6-Methyladenosine                   | 46 | 3   | 21.2 | no  | no  | 0.788 | 0.997 |
| Adenosine    | N6-Phenyladenosine                   | 46 | -4  | 19.8 | no  | no  | 0.680 | 0.997 |
| Adenosine    | Propentofylline                      | 35 | -3  | 19.9 | no  | no  | 0.687 | 0.997 |
| Adenosine    | R(-)-N6-(2-Phenylisopropyl)adenosine | 40 | -3  | 20.4 | no  | no  | 0.619 | 0.997 |
| Adenosine    | S-(4-Nitrobenzyl)-6-thioguanosine    | 41 | 9   | 24.8 | no  | no  | 0.158 | 0.691 |
| Adenosine    | S-(4-Nitrobenzyl)-6-thioinosine      | 37 | 0   | 21.2 | no  | no  | 0.811 | 0.997 |
| Adenosine    | Theobromine                          | 36 | -2  | 20.8 | no  | no  | 0.983 | 0.997 |
| Adenosine    | Theophylline                         | 50 | 0   | 21.2 | no  | no  | 0.119 | 0.606 |
| Adenosine    | VUF 5574                             | 43 | -16 | 17.5 | no  | no  | 0.001 | 0.020 |
| Adenosine    | Xanthine amine congener              | 31 | -6  | 19.7 | no  | no  | 0.350 | 0.925 |
| Adrenergic   | S(-)-Pindolol                        | 38 | 0   | 21.4 | no  | no  | 0.720 | 0.997 |
| Adrenoceptor | (-)-alpha-Methylnorepinephrine       | 33 | -3  | 20.8 | no  | no  | 0.971 | 0.997 |
| Adrenoceptor | (-)-Ephedrine hemisulfate            | 38 | 11  | 22.5 | no  | no  | 0.276 | 0.843 |
| Adrenoceptor | (-)-Epinephrine bitartrate           | 49 | 6   | 21.4 | no  | no  | 0.697 | 0.997 |
| Adrenoceptor | (-)-Isoproterenol hydrochloride      | 59 | -3  | 20.0 | no  | no  | 0.983 | 0.997 |
| Adrenoceptor | (±)-Atenolol                         | 37 | 10  | 24.0 | no  | no  | 0.419 | 0.968 |
| Adrenoceptor | (±)-CGP-12177A hydrochloride         | 50 | 7   | 22.9 | no  | no  | 0.340 | 0.917 |
| Adrenoceptor | (±)-Epinephrine hydrochloride        | 38 | 10  | 22.3 | no  | no  | 0.321 | 0.903 |
| Adrenoceptor | (±)-Isoproterenol hydrochloride      | 45 | 0   | 20.7 | no  | no  | 0.780 | 0.997 |
| Adrenoceptor | (±)-Metoprolol (+)-tartrate          | 36 | 5   | 21.5 | no  | no  | 0.710 | 0.997 |
| Adrenoceptor | (±)-Norepinephrine (+)bitartrate     | 45 | -6  | 21.5 | no  | no  | 0.823 | 0.997 |
| Adrenoceptor | (±)-Normetanephrine hydrochloride    | 48 | 6   | 22.4 | no  | no  | 0.627 | 0.997 |
| Adrenoceptor | (±)-Octopamine hydrochloride         | 40 | -13 | 18.4 | no  | no  | 0.031 | 0.274 |
| Adrenoceptor | (±)-Propranolol hydrochloride        | 46 | 7   | 22.7 | yes | no  | 0.115 | 0.595 |
| Adrenoceptor | (±)-Sotalol hydrochloride            | 24 | -2  | 20.5 | no  | no  | 0.728 | 0.997 |
| Adrenoceptor | (±)-Synephrine                       | 40 | -6  | 19.6 | no  | no  | 0.031 | 0.270 |
| Adrenoceptor | (±)-Vanillylmandelic acid            | 46 | -2  | 19.6 | no  | no  | 0.796 | 0.997 |
| Adrenoceptor | (S)-(-)-propafenone hydrochloride    | 39 | -4  | 19.7 | no  | no  | 0.751 | 0.997 |
| Adrenoceptor | (S)-Propranolol hydrochloride        | 31 | 14  | 23.4 | no  | no  | 0.175 | 0.721 |
| Adrenoceptor | 6-Fluoronorepinephrine hydrochloride | 47 | -2  | 21.2 | no  | no  | 0.579 | 0.997 |
| Adrenoceptor | 6-Hydroxy-DL-DOPA                    | 42 | -9  | 18.1 | no  | no  | 0.513 | 0.996 |
| Adrenoceptor | A-315456                             | 44 | -9  | 20.7 | no  | no  | 0.264 | 0.830 |
| Adrenoceptor | Albuterol hemisulfate                | 45 | -6  | 19.6 | no  | no  | 0.165 | 0.705 |
| Adrenoceptor | Alprenolol hydrochloride             | 43 | 1   | 22.1 | no  | no  | 0.577 | 0.997 |
| Adrenoceptor | Amiodarone hydrochloride             | 48 | -50 | 10.8 | no  | no  | 0.000 | 0.000 |
| Adrenoceptor | Amitriptyline hydrochloride          | 34 | 20  | 26.3 | yes | no  | 0.091 | 0.533 |
| Adrenoceptor | Amoxapine                            | 40 | 39  | 30.4 | yes | yes | 0.000 | 0.001 |
| Adrenoceptor | Benoxathian hydrochloride            | 42 | 6   | 23.0 | no  | no  | 0.327 | 0.904 |
| Adrenoceptor | Betaxolol hydrochloride              | 34 | -9  | 19.8 | no  | no  | 0.367 | 0.937 |
| Adrenoceptor | B-HT 933 dihydrochloride             | 35 | -8  | 19.9 | no  | no  | 0.199 | 0.755 |



|              |                                      |    |     |      |     |     |       |       |
|--------------|--------------------------------------|----|-----|------|-----|-----|-------|-------|
| Adrenoceptor | Bisoprolol hemifumarate salt         | 29 | 4   | 21.9 | no  | no  | 0.487 | 0.996 |
| Adrenoceptor | Bretylium tosylate                   | 44 | -4  | 20.9 | no  | no  | 0.761 | 0.997 |
| Adrenoceptor | BRL 37344 sodium                     | 47 | -8  | 20.0 | no  | no  | 0.570 | 0.997 |
| Adrenoceptor | Bromoacetyl alprenolol menthane      | 48 | -21 | 17.0 | no  | no  | 0.007 | 0.103 |
| Adrenoceptor | CGP 20712A methanesulfonate          | 41 | 3   | 22.1 | no  | no  | 0.345 | 0.923 |
| Adrenoceptor | Chloroethylclonidine dihydrochloride | 43 | -4  | 20.7 | no  | no  | 0.914 | 0.997 |
| Adrenoceptor | Cirazoline hydrochloride             | 52 | 7   | 22.8 | yes | no  | 0.102 | 0.560 |
| Adrenoceptor | CL 316,243                           | 35 | 6   | 22.9 | no  | no  | 0.557 | 0.997 |
| Adrenoceptor | Clonidine hydrochloride              | 40 | 3   | 22.5 | no  | no  | 0.631 | 0.997 |
| Adrenoceptor | Desipramine hydrochloride            | 50 | 7   | 23.0 | no  | no  | 0.314 | 0.897 |
| Adrenoceptor | Dobutamine hydrochloride             | 44 | 8   | 23.1 | no  | no  | 0.524 | 0.997 |
| Adrenoceptor | Doxazosin mesylate                   | 38 | 11  | 23.2 | yes | yes | 0.017 | 0.186 |
| Adrenoceptor | Doxepin hydrochloride                | 37 | 15  | 24.7 | yes | no  | 0.017 | 0.186 |
| Adrenoceptor | DSP-4 hydrochloride                  | 40 | 2   | 22.1 | no  | no  | 0.806 | 0.997 |
| Adrenoceptor | Fenoterol hydrobromide               | 55 | 5   | 21.2 | no  | no  | 0.670 | 0.997 |
| Adrenoceptor | Fenspiride hydrochloride             | 34 | 4   | 21.1 | no  | no  | 0.777 | 0.997 |
| Adrenoceptor | Fiduxosin hydrochloride              | 32 | -11 | 18.1 | no  | no  | 0.282 | 0.853 |
| Adrenoceptor | Formoterol                           | 37 | 2   | 20.7 | no  | no  | 0.379 | 0.946 |
| Adrenoceptor | Guanabenz acetate                    | 43 | 19  | 23.6 | yes | yes | 0.030 | 0.269 |
| Adrenoceptor | Guanfacine hydrochloride             | 43 | 27  | 25.7 | yes | yes | 0.014 | 0.168 |
| Adrenoceptor | ICI 118,551 hydrochloride            | 44 | 0   | 20.8 | no  | no  | 0.791 | 0.997 |
| Adrenoceptor | Imiloxan hydrochloride               | 37 | 0   | 20.8 | no  | no  | 0.918 | 0.997 |
| Adrenoceptor | Isotharine mesylate                  | 35 | 0   | 20.6 | no  | no  | 0.738 | 0.997 |
| Adrenoceptor | L(-)-Norepinephrine bitartrate       | 38 | 6   | 23.1 | no  | no  | 0.574 | 0.997 |
| Adrenoceptor | L-765,314                            | 36 | 3   | 21.9 | yes | no  | 0.017 | 0.186 |
| Adrenoceptor | Labetalol hydrochloride              | 31 | 11  | 22.9 | no  | no  | 0.307 | 0.885 |
| Adrenoceptor | Maprotiline hydrochloride            | 35 | 10  | 23.4 | yes | no  | 0.103 | 0.560 |
| Adrenoceptor | Metaproterenol hemisulfate           | 44 | 2   | 21.0 | no  | no  | 0.659 | 0.997 |
| Adrenoceptor | Methoxamine hydrochloride            | 37 | 3   | 21.1 | no  | no  | 0.786 | 0.997 |
| Adrenoceptor | MHPG piperazine                      | 36 | 11  | 22.0 | no  | no  | 0.189 | 0.743 |
| Adrenoceptor | MHPG sulfate potassium               | 44 | 11  | 22.2 | no  | no  | 0.389 | 0.950 |
| Adrenoceptor | MK-912                               | 48 | 8   | 22.2 | yes | no  | 0.058 | 0.421 |
| Adrenoceptor | Moxisylyte hydrochloride             | 52 | -8  | 19.0 | no  | no  | 0.426 | 0.973 |
| Adrenoceptor | Moxonidine hydrochloride             | 45 | 0   | 20.6 | no  | no  | 0.735 | 0.997 |
| Adrenoceptor | Naftopidil dihydrochloride           | 30 | 14  | 24.0 | yes | yes | 0.018 | 0.187 |
| Adrenoceptor | Naphazoline hydrochloride            | 34 | 2   | 21.7 | no  | no  | 0.740 | 0.997 |
| Adrenoceptor | Nisoxetine hydrochloride             | 49 | 0   | 21.0 | no  | no  | 0.791 | 0.997 |
| Adrenoceptor | Nortriptyline hydrochloride          | 41 | 26  | 26.7 | yes | yes | 0.000 | 0.001 |
| Adrenoceptor | Nylidrin hydrochloride               | 41 | -12 | 18.5 | no  | no  | 0.298 | 0.871 |
| Adrenoceptor | Oxymetazoline hydrochloride          | 41 | -6  | 19.8 | no  | no  | 0.975 | 0.997 |
| Adrenoceptor | p-Aminoclonidine hydrochloride       | 46 | -6  | 21.3 | no  | no  | 0.395 | 0.951 |
| Adrenoceptor | Phenoxybenzamine hydrochloride       | 53 | -4  | 20.9 | no  | no  | 0.713 | 0.997 |
| Adrenoceptor | Phentolamine mesylate                | 33 | 3   | 21.1 | no  | no  | 0.839 | 0.997 |
| Adrenoceptor | Phenylephrine hydrochloride          | 32 | -5  | 20.0 | no  | no  | 0.118 | 0.606 |
| Adrenoceptor | Pindolol                             | 52 | -11 | 18.8 | no  | no  | 0.058 | 0.421 |
| Adrenoceptor | p-Iodoclonidine hydrochloride        | 46 | 5   | 21.7 | no  | no  | 0.442 | 0.985 |

|              |                                                |    |     |      |     |     |       |       |
|--------------|------------------------------------------------|----|-----|------|-----|-----|-------|-------|
| Adrenoceptor | Prazosin hydrochloride                         | 38 | 6   | 21.8 | no  | no  | 0.223 | 0.787 |
| Adrenoceptor | Protriptyline hydrochloride                    | 36 | 11  | 22.8 | no  | no  | 0.228 | 0.787 |
| Adrenoceptor | R(-)-Denopamine                                | 48 | -6  | 19.6 | no  | no  | 0.903 | 0.997 |
| Adrenoceptor | R(-)-Isoproterenol (+)-bitartrate              | 47 | 6   | 21.0 | no  | no  | 0.496 | 0.996 |
| Adrenoceptor | R(+)-Atenolol                                  | 41 | 1   | 22.2 | no  | no  | 0.742 | 0.997 |
| Adrenoceptor | Rauwolfscine hydrochloride                     | 37 | 16  | 24.1 | no  | no  | 0.144 | 0.661 |
| Adrenoceptor | Ritodrine hydrochloride                        | 37 | 6   | 22.1 | no  | no  | 0.907 | 0.997 |
| Adrenoceptor | RX 821002 hydrochloride                        | 47 | -1  | 20.7 | no  | no  | 0.840 | 0.997 |
| Adrenoceptor | S(-)-Atenolol                                  | 39 | -2  | 21.5 | no  | no  | 0.703 | 0.997 |
| Adrenoceptor | S(-)-Timolol maleate                           | 43 | -2  | 20.8 | no  | no  | 0.606 | 0.997 |
| Adrenoceptor | S(+)-Isoproterenol (+)-bitartrate              | 44 | 1   | 21.0 | no  | no  | 0.764 | 0.997 |
| Adrenoceptor | Salbutamol                                     | 41 | 0   | 20.8 | no  | no  | 0.869 | 0.997 |
| Adrenoceptor | Salmeterol xinafoate                           | 38 | -12 | 18.3 | no  | no  | 0.098 | 0.560 |
| Adrenoceptor | SKF 86466                                      | 38 | 2   | 21.3 | no  | no  | 0.469 | 0.995 |
| Adrenoceptor | SR 59230A oxalate                              | 37 | -3  | 20.7 | no  | no  | 0.271 | 0.836 |
| Adrenoceptor | Terazosin hydrochloride                        | 40 | -5  | 20.2 | no  | no  | 0.384 | 0.948 |
| Adrenoceptor | Terbutaline hemisulfate                        | 42 | 3   | 21.8 | no  | no  | 0.492 | 0.996 |
| Adrenoceptor | Tetrahydrozoline hydrochloride                 | 27 | 14  | 24.2 | no  | no  | 0.563 | 0.997 |
| Adrenoceptor | Tomoxetine                                     | 31 | 0   | 20.9 | no  | no  | 0.705 | 0.997 |
| Adrenoceptor | Tulobuterol hydrochloride                      | 47 | 0   | 21.2 | no  | no  | 0.851 | 0.997 |
| Adrenoceptor | UK 14,304                                      | 41 | 5   | 22.0 | no  | no  | 0.457 | 0.990 |
| Adrenoceptor | Urapidil hydrochloride                         | 41 | 9   | 22.8 | no  | no  | 0.334 | 0.908 |
| Adrenoceptor | Urapidil, 5-Methyl-                            | 51 | -3  | 20.2 | no  | no  | 0.585 | 0.997 |
| Adrenoceptor | WB-4101 hydrochloride                          | 26 | -4  | 20.6 | no  | no  | 0.704 | 0.997 |
| Adrenoceptor | Xamoterol hemifumarate                         | 46 | 12  | 23.3 | no  | no  | 0.377 | 0.944 |
| Adrenoceptor | Xylazine hydrochloride                         | 28 | 14  | 23.8 | no  | no  | 0.178 | 0.726 |
| Adrenoceptor | Xylometazoline hydrochloride                   | 40 | 7   | 22.3 | no  | no  | 0.624 | 0.997 |
| Adrenoceptor | Yohimbine hydrochloride                        | 37 | 8   | 22.5 | no  | no  | 0.316 | 0.897 |
| Angiogenesis | DL-alpha-Difluoromethylornithine hydrochloride | 40 | -4  | 20.2 | no  | no  | 0.841 | 0.997 |
| Antibiotic   | Aminopterin                                    | 32 | 8   | 24.6 | no  | no  | 0.513 | 0.996 |
| Antibiotic   | Cefaclor                                       | 42 | 0   | 21.8 | no  | no  | 0.754 | 0.997 |
| Antibiotic   | Cefazolin sodium                               | 39 | -9  | 19.8 | no  | no  | 0.077 | 0.487 |
| Antibiotic   | Cefmetazole sodium                             | 42 | -5  | 20.6 | no  | no  | 0.618 | 0.997 |
| Antibiotic   | Cefotaxime sodium                              | 56 | 7   | 23.2 | yes | no  | 0.114 | 0.595 |
| Antibiotic   | Cefsulodin sodium salt hydrate                 | 43 | 8   | 23.4 | no  | no  | 0.343 | 0.920 |
| Antibiotic   | Ceftriaxone sodium                             | 41 | 28  | 27.8 | yes | no  | 0.002 | 0.034 |
| Antibiotic   | Cephalexin hydrate                             | 38 | 12  | 24.3 | yes | no  | 0.103 | 0.560 |
| Antibiotic   | Cephalosporin C zinc salt                      | 41 | 0   | 21.8 | no  | no  | 0.684 | 0.997 |
| Antibiotic   | Cephalothin sodium                             | 36 | 6   | 22.9 | no  | no  | 0.722 | 0.997 |
| Antibiotic   | Cephapirin sodium                              | 47 | 5   | 22.8 | no  | no  | 0.805 | 0.997 |
| Antibiotic   | Cephradine                                     | 28 | 10  | 23.9 | no  | no  | 0.583 | 0.997 |
| Antibiotic   | Cinoxacin                                      | 42 | 1   | 21.9 | no  | no  | 0.941 | 0.997 |
| Antibiotic   | Demeclocycline hydrochloride                   | 43 | 16  | 24.4 | yes | yes | 0.089 | 0.530 |
| Antibiotic   | Doxycycline hydrochloride                      | 38 | 29  | 27.0 | yes | yes | 0.018 | 0.187 |
| Antibiotic   | Lomefloxacin hydrochloride                     | 37 | 12  | 23.2 | yes | no  | 0.128 | 0.627 |
| Antibiotic   | Mevastatin                                     | 34 | -2  | 20.2 | no  | no  | 0.665 | 0.997 |

|                |                                                                        |    |     |      |     |     |       |       |
|----------------|------------------------------------------------------------------------|----|-----|------|-----|-----|-------|-------|
| Antibiotic     | Minocycline hydrochloride                                              | 27 | 15  | 24.4 | yes | yes | 0.052 | 0.394 |
| Antibiotic     | Nalidixic acid sodium                                                  | 44 | 9   | 23.1 | yes | no  | 0.015 | 0.174 |
| Antibiotic     | Niclosamide                                                            | 36 | -21 | 16.7 | no  | no  | 0.000 | 0.000 |
| Antibiotic     | Ofloxacin                                                              | 49 | 8   | 22.9 | no  | no  | 0.212 | 0.776 |
| Antibiotic     | Oxolinic acid                                                          | 45 | 8   | 22.7 | no  | no  | 0.255 | 0.820 |
| Antibiotic     | Paromomycin sulfate                                                    | 35 | 5   | 21.5 | no  | no  | 0.947 | 0.997 |
| Antibiotic     | Phosphomycin disodium                                                  | 46 | -7  | 19.7 | no  | no  | 0.616 | 0.997 |
| Antibiotic     | Praziquantel                                                           | 27 | -5  | 20.2 | no  | no  | 0.465 | 0.995 |
| Antibiotic     | Pyrazinocarboxamide                                                    | 50 | -2  | 20.1 | no  | no  | 0.778 | 0.997 |
| Antibiotic     | Thiolactomycin                                                         | 47 | 2   | 21.5 | no  | no  | 0.470 | 0.995 |
| Antibiotic     | Trimethoprim                                                           | 41 | 14  | 23.8 | yes | no  | 0.028 | 0.255 |
| Antibiotic     | Vancomycin hydrochloride                                               | 44 | 5   | 21.9 | no  | no  | 0.252 | 0.817 |
| Anticonvulsant | 5,5-Diphenylhydantoin                                                  | 33 | -1  | 21.1 | no  | no  | 0.898 | 0.997 |
| Anticonvulsant | Carbamazepine                                                          | 52 | 2   | 22.2 | no  | no  | 0.728 | 0.997 |
| Anticonvulsant | Ethosuximide                                                           | 45 | 3   | 20.9 | no  | no  | 0.797 | 0.997 |
| Anticonvulsant | Foliosidine                                                            | 48 | -4  | 19.5 | no  | no  | 0.609 | 0.997 |
| Anticonvulsant | Gabapentin                                                             | 44 | -2  | 19.5 | no  | no  | 0.983 | 0.997 |
| Anticonvulsant | Lamotrigine                                                            | 40 | -3  | 20.2 | no  | no  | 0.718 | 0.997 |
| Anticonvulsant | N-(4-Amino-2-chlorophenyl)phthalimide                                  | 40 | 4   | 22.7 | no  | no  | 0.789 | 0.997 |
| Anticonvulsant | Phenytoin sodium                                                       | 31 | -5  | 20.4 | no  | no  | 0.959 | 0.997 |
| Anticonvulsant | Primidone                                                              | 36 | 7   | 22.0 | no  | no  | 0.894 | 0.997 |
| Anticonvulsant | Valproic acid sodium                                                   | 48 | -2  | 20.7 | no  | no  | 0.947 | 0.997 |
| Anticonvulsant | Zonisamide sodium                                                      | 32 | -4  | 20.0 | no  | no  | 0.455 | 0.990 |
| Apoptosis      | (S)-(+)-Camptothecin                                                   | 32 | 8   | 23.1 | no  | no  | 0.875 | 0.997 |
| Apoptosis      | 1,5-Isouinolinediol                                                    | 42 | 0   | 20.8 | no  | no  | 0.894 | 0.997 |
| Apoptosis      | 3-aminobenzamide                                                       | 49 | -12 | 20.1 | no  | no  | 0.162 | 0.700 |
| Apoptosis      | 4-Amino-1,8-naphthalimide                                              | 35 | -4  | 21.9 | no  | no  | 0.375 | 0.944 |
| Apoptosis      | Aurintricarboxylic acid                                                | 52 | -6  | 21.4 | no  | no  | 0.657 | 0.997 |
| Apoptosis      | Benzamide                                                              | 43 | -4  | 20.9 | no  | no  | 0.881 | 0.997 |
| Apoptosis      | beta-Lapachone                                                         | 38 | -8  | 19.1 | no  | no  | 0.058 | 0.422 |
| Apoptosis      | Emetine dihydrochloride hydrate                                        | 37 | 9   | 22.8 | no  | no  | 0.188 | 0.743 |
| Apoptosis      | Etoposide                                                              | 31 | 2   | 21.3 | no  | no  | 0.946 | 0.997 |
| Apoptosis      | Imiquimod                                                              | 35 | 3   | 21.5 | no  | no  | 0.566 | 0.997 |
| Apoptosis      | m-Iodobenzylguanidine hemisulfate                                      | 38 | -7  | 19.3 | no  | no  | 0.392 | 0.951 |
| Apoptosis      | Pifithrin-mu                                                           | 35 | -1  | 21.0 | no  | no  | 0.461 | 0.993 |
| Apoptosis      | Retinoic acid                                                          | 32 | 1   | 21.1 | no  | no  | 0.807 | 0.997 |
| Apoptosis      | Sobuzoxane                                                             | 33 | 6   | 22.1 | no  | no  | 0.413 | 0.966 |
| Apoptosis      | XK469                                                                  | 46 | 8   | 22.5 | no  | no  | 0.412 | 0.966 |
| Benzodiazepine | 3-Methyl-6-(3-[trifluoromethyl]phenyl)-1,2,4-triazolo[4,3-b]pyridazine | 37 | -3  | 19.9 | no  | no  | 0.239 | 0.789 |
| Benzodiazepine | CB34                                                                   | 35 | 5   | 22.9 | no  | no  | 0.615 | 0.997 |
| Benzodiazepine | Flumazenil                                                             | 36 | 6   | 21.5 | no  | no  | 0.586 | 0.997 |
| Benzodiazepine | L-655,708                                                              | 22 | 20  | 24.8 | yes | no  | 0.073 | 0.471 |
| Benzodiazepine | Methyl 6,7-dimethoxy-4-ethyl-beta-carboline-3-carboxylate              | 47 | 17  | 23.8 | yes | no  | 0.038 | 0.316 |
| Benzodiazepine | Methyl beta-carboline-3-carboxylate                                    | 30 | 3   | 20.8 | no  | no  | 0.688 | 0.997 |

|                |                                                                   |    |     |      |     |     |       |       |
|----------------|-------------------------------------------------------------------|----|-----|------|-----|-----|-------|-------|
| Benzodiazepine | N,N-Dihexyl-2-(4-fluorophenyl)indole-3-acetamide                  | 37 | 20  | 25.2 | yes | no  | 0.043 | 0.351 |
| Biochemistry   | (±)-p-Aminogluthethimide                                          | 34 | 17  | 25.7 | yes | no  | 0.104 | 0.563 |
| Biochemistry   | 1,10-Phenanthroline monohydrate                                   | 40 | -19 | 16.6 | no  | no  | 0.000 | 0.003 |
| Biochemistry   | 1-Deoxynojirimycin hydrochloride                                  | 38 | -2  | 20.5 | no  | no  | 0.636 | 0.997 |
| Biochemistry   | 2,2'-Bipyridyl                                                    | 31 | 6   | 22.3 | no  | no  | 0.560 | 0.997 |
| Biochemistry   | 2,4-Dinitrophenyl 2-fluoro-2-deoxy-beta-D-glucopyranoside         | 40 | 11  | 23.7 | no  | no  | 0.213 | 0.776 |
| Biochemistry   | 2-Chloro-2-deoxy-D-glucose                                        | 30 | 8   | 23.2 | no  | no  | 0.615 | 0.997 |
| Biochemistry   | 3,4-Dichloroisocoumarin                                           | 29 | 28  | 26.9 | yes | yes | 0.052 | 0.394 |
| Biochemistry   | 3-Hydroxybenzylhydrazine dihydrochloride                          | 44 | 1   | 20.1 | no  | no  | 0.692 | 0.997 |
| Biochemistry   | 4-(2-Aminoethyl)benzenesulfonyl fluoride hydrochloride            | 33 | 1   | 22.0 | no  | no  | 0.922 | 0.997 |
| Biochemistry   | 4-Aminobenzamidine dihydrochloride                                | 53 | -8  | 20.9 | no  | no  | 0.623 | 0.997 |
| Biochemistry   | 4-Chloromercuribenzoic acid                                       | 43 | -46 | 11.8 | no  | no  | 0.000 | 0.000 |
| Biochemistry   | 4-Hydroxybenzhydrazide                                            | 47 | 10  | 21.9 | no  | no  | 0.197 | 0.754 |
| Biochemistry   | 4-Methylpyrazole hydrochloride                                    | 48 | 2   | 20.9 | no  | no  | 0.905 | 0.997 |
| Biochemistry   | Acetamide                                                         | 31 | 1   | 23.1 | no  | no  | 0.832 | 0.997 |
| Biochemistry   | Acetazolamide                                                     | 36 | -13 | 19.7 | no  | no  | 0.089 | 0.530 |
| Biochemistry   | Actinonin                                                         | 43 | -2  | 22.3 | no  | no  | 0.610 | 0.997 |
| Biochemistry   | Benserazide hydrochloride                                         | 35 | 2   | 22.1 | no  | no  | 0.976 | 0.997 |
| Biochemistry   | Benzamidine hydrochloride                                         | 43 | 5   | 22.8 | no  | no  | 0.790 | 0.997 |
| Biochemistry   | Bestatin hydrochloride                                            | 33 | -10 | 19.5 | no  | no  | 0.370 | 0.939 |
| Biochemistry   | beta-Chloro-L-alanine hydrochloride                               | 42 | 1   | 22.1 | no  | no  | 0.921 | 0.997 |
| Biochemistry   | Betaine hydrochloride                                             | 32 | 12  | 24.3 | no  | no  | 0.324 | 0.904 |
| Biochemistry   | Chlorothiazide                                                    | 51 | -3  | 21.2 | no  | no  | 0.985 | 0.997 |
| Biochemistry   | Diethylenetriaminepentaacetic acid                                | 49 | 9   | 22.9 | no  | no  | 0.183 | 0.737 |
| Biochemistry   | E-64                                                              | 42 | -3  | 20.3 | no  | no  | 0.839 | 0.997 |
| Biochemistry   | Epibestatin hydrochloride                                         | 42 | -2  | 20.6 | no  | no  | 0.786 | 0.997 |
| Biochemistry   | Ethylene glycol-bis(2-aminoethylether)-N,N,N',N'-tetraacetic acid | 49 | -5  | 19.1 | no  | no  | 0.614 | 0.997 |
| Biochemistry   | Furafylline                                                       | 38 | -9  | 18.4 | no  | no  | 0.648 | 0.997 |
| Biochemistry   | Hydrochlorothiazide                                               | 37 | 14  | 22.8 | yes | no  | 0.108 | 0.571 |
| Biochemistry   | Iodoacetamide                                                     | 55 | 10  | 22.0 | no  | no  | 0.129 | 0.630 |
| Biochemistry   | L-allylglycine                                                    | 42 | -11 | 19.5 | no  | no  | 0.098 | 0.560 |
| Biochemistry   | L-alpha-Methyl DOPA                                               | 37 | 10  | 23.2 | yes | no  | 0.126 | 0.624 |
| Biochemistry   | L-azetidine-2-carboxylic acid                                     | 47 | -6  | 21.5 | no  | no  | 0.445 | 0.985 |
| Biochemistry   | L-Leucinethiol, oxidized dihydrochloride                          | 38 | 5   | 21.8 | no  | no  | 0.723 | 0.997 |
| Biochemistry   | N-Ethylmaleimide                                                  | 47 | 1   | 20.4 | no  | no  | 0.693 | 0.997 |
| Biochemistry   | N-p-Tosyl-L-phenylalanine chloromethyl ketone                     | 52 | 2   | 21.6 | no  | no  | 0.663 | 0.997 |
| Biochemistry   | O-(Carboxymethyl)hydroxylamine hemihydrochloride                  | 43 | -6  | 21.5 | no  | no  | 0.706 | 0.997 |
| Biochemistry   | P1,P4-Di(adenosine-5')tetraphosphate triammonium                  | 40 | -14 | 18.4 | no  | no  | 0.089 | 0.530 |
| Biochemistry   | PD 404,182                                                        | 37 | 0   | 21.1 | no  | no  | 0.563 | 0.997 |
| Biochemistry   | Phosphoramidon disodium                                           | 43 | 0   | 20.9 | no  | no  | 0.973 | 0.997 |
| Biochemistry   | S-(-)-Carbidopa                                                   | 33 | -2  | 21.0 | no  | no  | 0.706 | 0.997 |

|              |                                         |    |     |      |     |     |       |       |
|--------------|-----------------------------------------|----|-----|------|-----|-----|-------|-------|
| Biochemistry | Sodium Oxamate                          | 44 | -13 | 18.5 | no  | no  | 0.181 | 0.733 |
| Biochemistry | Tetraethylthiuram disulfide             | 36 | -3  | 20.6 | no  | no  | 0.805 | 0.997 |
| Biochemistry | Tetraisopropyl pyrophosphoramidate      | 41 | -6  | 19.9 | no  | no  | 0.940 | 0.997 |
| Biochemistry | Z-L-Phe chloromethyl ketone             | 35 | -3  | 21.0 | no  | no  | 0.872 | 0.997 |
| Ca2+ Channel | (±)-Bay K 8644                          | 31 | 12  | 24.2 | no  | no  | 0.269 | 0.834 |
| Ca2+ Channel | (±)-Methoxyverapamil hydrochloride      | 29 | -6  | 19.3 | no  | no  | 0.297 | 0.871 |
| Ca2+ Channel | (±)-Verapamil hydrochloride             | 35 | 12  | 23.5 | no  | no  | 0.204 | 0.760 |
| Ca2+ Channel | Bepridil hydrochloride                  | 41 | -6  | 20.4 | no  | no  | 0.549 | 0.997 |
| Ca2+ Channel | Cilnidipine                             | 35 | -8  | 19.3 | no  | no  | 0.926 | 0.997 |
| Ca2+ Channel | Cinnarizine                             | 33 | 11  | 24.1 | yes | yes | 0.018 | 0.187 |
| Ca2+ Channel | Diltiazem hydrochloride                 | 45 | -2  | 21.1 | no  | no  | 0.982 | 0.997 |
| Ca2+ Channel | Felodipine                              | 39 | -54 | 9.3  | no  | no  | 0.000 | 0.000 |
| Ca2+ Channel | FPL 64176                               | 41 | -8  | 18.6 | no  | no  | 0.478 | 0.996 |
| Ca2+ Channel | Mibefradil dihydrochloride              | 29 | -4  | 19.7 | no  | no  | 0.637 | 0.997 |
| Ca2+ Channel | MRS 1845                                | 25 | 0   | 20.5 | no  | no  | 1.000 | 1.000 |
| Ca2+ Channel | Nicardipine hydrochloride               | 31 | 20  | 25.4 | yes | yes | 0.002 | 0.027 |
| Ca2+ Channel | Nifedipine                              | 46 | 6   | 22.4 | no  | no  | 0.199 | 0.755 |
| Ca2+ Channel | Nimodipine                              | 31 | 7   | 22.6 | yes | no  | 0.066 | 0.451 |
| Ca2+ Channel | Nitrendipine                            | 42 | 12  | 23.6 | yes | yes | 0.009 | 0.120 |
| Ca2+ Channel | NNC 55-0396                             | 43 | -26 | 15.2 | no  | no  | 0.021 | 0.215 |
| Ca2+ Channel | Phloretin                               | 39 | -1  | 20.4 | no  | no  | 0.606 | 0.997 |
| Ca2+ Channel | SKF 96365                               | 27 | -3  | 20.2 | no  | no  | 0.982 | 0.997 |
| Ca2+ Channel | YS-035 hydrochloride                    | 39 | 12  | 23.4 | yes | no  | 0.065 | 0.448 |
| Cannabinoid  | ( R)-(+)-WIN 55,212-2 mesylate          | 38 | 8   | 22.5 | no  | no  | 0.462 | 0.993 |
| Cannabinoid  | CP55940                                 | 40 | -1  | 21.4 | no  | no  | 0.596 | 0.997 |
| Cannabinoid  | JWH-015                                 | 40 | -6  | 19.5 | no  | no  | 0.891 | 0.997 |
| Cannabinoid  | N-arachidonylglycine                    | 41 | 8   | 24.5 | no  | no  | 0.166 | 0.705 |
| Cannabinoid  | Palmitoylethanolamide                   | 41 | -8  | 19.5 | no  | no  | 0.183 | 0.737 |
| Cell Cycle   | 5-Fluorouracil                          | 40 | 5   | 21.3 | no  | no  | 0.840 | 0.997 |
| Cell Cycle   | Apigenin                                | 28 | 3   | 23.5 | no  | no  | 0.865 | 0.997 |
| Cell Cycle   | Bay 11-7085                             | 41 | -2  | 21.2 | no  | no  | 0.491 | 0.996 |
| Cell Cycle   | Caffeic acid phenethyl ester            | 36 | 3   | 22.5 | no  | no  | 0.675 | 0.997 |
| Cell Cycle   | Daidzein                                | 42 | -1  | 20.7 | no  | no  | 0.960 | 0.997 |
| Cell Cycle   | Ellipticine                             | 33 | 8   | 21.9 | no  | no  | 0.234 | 0.787 |
| Cell Cycle   | Fusidic acid sodium                     | 40 | 1   | 20.4 | no  | no  | 0.926 | 0.997 |
| Cell Cycle   | Ganciclovir                             | 40 | -9  | 18.4 | no  | no  | 0.210 | 0.773 |
| Cell Cycle   | MDL 28170                               | 46 | 0   | 20.6 | no  | no  | 0.958 | 0.997 |
| Cell Cycle   | Pyrocatechol                            | 35 | 8   | 23.5 | no  | no  | 0.338 | 0.914 |
| Cell Cycle   | Retinoic acid p-hydroxyanilide          | 41 | -3  | 19.2 | no  | no  | 0.820 | 0.997 |
| Cell Cycle   | Ribavirin                               | 40 | -12 | 18.5 | no  | no  | 0.403 | 0.957 |
| Cell Cycle   | Se-(methyl)selenocysteine hydrochloride | 55 | -64 | 7.3  | no  | no  | 0.000 | 0.000 |
| Cell Cycle   | SU 9516                                 | 38 | 7   | 22.5 | no  | no  | 0.793 | 0.997 |
| Cell Cycle   | TG003                                   | 39 | -3  | 20.4 | no  | no  | 0.262 | 0.827 |
| Cell Stress  | (+)-Catechin Hydrate                    | 40 | 8   | 23.5 | no  | no  | 0.186 | 0.741 |
| Cell Stress  | (±)-alpha-Lipoic Acid                   | 48 | -6  | 19.9 | no  | no  | 0.950 | 0.997 |
| Cell Stress  | (±)-Taxifolin                           | 47 | 2   | 21.8 | no  | no  | 0.467 | 0.995 |

|                 |                                                             |    |     |      |     |     |       |       |
|-----------------|-------------------------------------------------------------|----|-----|------|-----|-----|-------|-------|
| Cell Stress     | 2,3-Dimethoxy-1,4-naphthoquinone                            | 60 | -15 | 18.2 | no  | no  | 0.034 | 0.292 |
| Cell Stress     | 3-Nitropropionic acid                                       | 56 | -9  | 19.3 | no  | no  | 0.230 | 0.787 |
| Cell Stress     | 5,5-Dimethyl-1-pyrroline-N-oxide                            | 37 | 7   | 22.9 | no  | no  | 0.505 | 0.996 |
| Cell Stress     | Allopurinol                                                 | 40 | -10 | 19.8 | no  | no  | 0.134 | 0.642 |
| Cell Stress     | Amifostine                                                  | 44 | -4  | 21.9 | no  | no  | 0.704 | 0.997 |
| Cell Stress     | Astaxanthin                                                 | 29 | 17  | 25.6 | no  | no* | 0.234 | 0.787 |
| Cell Stress     | Caffeic Acid                                                | 38 | 5   | 22.7 | no  | no  | 0.742 | 0.997 |
| Cell Stress     | Hypotaurine                                                 | 44 | 1   | 20.0 | no  | no  | 0.854 | 0.997 |
| Cell Stress     | Isoxanthopterin                                             | 33 | 0   | 20.8 | no  | no  | 0.945 | 0.997 |
| Cell Stress     | L-Canavanine                                                | 26 | 5   | 21.2 | no  | no  | 0.837 | 0.997 |
| Cell Stress     | Lonidamine                                                  | 47 | -3  | 20.0 | no  | no  | 0.932 | 0.997 |
| Cell Stress     | Morin                                                       | 36 | 10  | 22.7 | no  | no  | 0.267 | 0.833 |
| Cell Stress     | N,N,N',N'-Tetramethylazodicarboxamide                       | 40 | 1   | 21.6 | no  | no  | 0.588 | 0.997 |
| Cell Stress     | Rotenone                                                    | 31 | -43 | 11.8 | no  | no  | 0.000 | 0.000 |
| Cell Stress     | U-74389G maleate                                            | 52 | 6   | 22.1 | no  | no  | 0.390 | 0.950 |
| Cholecystokinin | CR 2945                                                     | 41 | -11 | 18.5 | no  | no  | 0.214 | 0.776 |
| Cholecystokinin | Lorglumide sodium                                           | 32 | -6  | 19.3 | no  | no  | 0.347 | 0.923 |
| Cholecystokinin | Proglumide                                                  | 52 | 2   | 21.7 | no  | no  | 0.366 | 0.937 |
| Cholinergic     | (-)-Cotinine                                                | 49 | 1   | 22.0 | no  | no  | 0.484 | 0.996 |
| Cholinergic     | (-)-Eseroline fumarate                                      | 39 | 4   | 21.0 | no  | no  | 0.948 | 0.997 |
| Cholinergic     | (-)-Nicotine hydrogen tartrate salt                         | 27 | 9   | 23.1 | no  | no  | 0.435 | 0.983 |
| Cholinergic     | (-)-Physostigmine                                           | 37 | 11  | 22.5 | no  | no  | 0.232 | 0.787 |
| Cholinergic     | (-)-Scopolamine hydrobromide                                | 37 | -11 | 18.6 | no  | no  | 0.243 | 0.798 |
| Cholinergic     | (-)-Scopolamine methyl bromide                              | 48 | 1   | 21.0 | no  | no  | 0.843 | 0.997 |
| Cholinergic     | (-)-Scopolamine methyl nitrate                              | 38 | 3   | 21.6 | no  | no  | 0.858 | 0.997 |
| Cholinergic     | (-)-Scopolamine,n-Butyl-, bromide                           | 37 | -1  | 20.7 | no  | no  | 0.736 | 0.997 |
| Cholinergic     | (+)-cis-Dioxolane iodide                                    | 25 | 5   | 22.4 | no  | no  | 0.821 | 0.997 |
| Cholinergic     | (+)-Nicotine (+)-di-p-toluoyl tartrate                      | 40 | 1   | 21.4 | no  | no  | 0.728 | 0.997 |
| Cholinergic     | (+)-Pilocarpine hydrochloride                               | 39 | 0   | 21.2 | no  | no  | 0.356 | 0.933 |
| Cholinergic     | (±)-Muscarine chloride                                      | 38 | -6  | 19.8 | no  | no  | 0.327 | 0.904 |
| Cholinergic     | (±)-Vesamicol hydrochloride                                 | 36 | 16  | 24.3 | yes | no  | 0.047 | 0.369 |
| Cholinergic     | 1,1-Dimethyl-4-phenyl-piperazinium iodide                   | 46 | 0   | 21.3 | no  | no  | 0.826 | 0.997 |
| Cholinergic     | 4-DAMP methiodide                                           | 40 | 0   | 20.9 | no  | no  | 0.926 | 0.997 |
| Cholinergic     | 4-Diphenylacetoxy-N-(2-chloroethyl)piperidine hydrochloride | 26 | 17  | 24.5 | no  | no  | 0.236 | 0.787 |
| Cholinergic     | 9-Amino-1,2,3,4-tetrahydroacridine hydrochloride            | 34 | -28 | 16.4 | no  | no  | 0.000 | 0.004 |
| Cholinergic     | Acetyl-beta-methylcholine chloride                          | 43 | -12 | 20.2 | no  | no  | 0.075 | 0.477 |
| Cholinergic     | Acetylcholine mustard hydrochloride                         | 47 | 11  | 23.6 | yes | no  | 0.051 | 0.391 |
| Cholinergic     | Acetylthiocholine chloride                                  | 34 | 3   | 23.4 | no  | no  | 0.974 | 0.997 |
| Cholinergic     | AF267B                                                      | 44 | -4  | 20.0 | no  | no  | 0.673 | 0.997 |
| Cholinergic     | alpha-Lobeline hydrochloride                                | 45 | -10 | 18.7 | no  | no  | 0.072 | 0.467 |
| Cholinergic     | Aminobenzotropine                                           | 38 | -5  | 20.7 | no  | no  | 0.594 | 0.997 |
| Cholinergic     | Arecaidine propargyl ester hydrobromide                     | 37 | 6   | 23.2 | no  | no  | 0.934 | 0.997 |
| Cholinergic     | Arecoline hydrobromide                                      | 36 | 10  | 25.0 | no  | no  | 0.575 | 0.997 |
| Cholinergic     | Atropine methyl bromide                                     | 43 | -6  | 21.4 | no  | no  | 0.519 | 0.997 |

|             |                                                                |    |     |      |     |     |       |       |
|-------------|----------------------------------------------------------------|----|-----|------|-----|-----|-------|-------|
| Cholinergic | Atropine methyl nitrate                                        | 43 | 0   | 22.7 | no  | no  | 0.788 | 0.997 |
| Cholinergic | Atropine sulfate                                               | 28 | -1  | 22.5 | no  | no  | 0.822 | 0.997 |
| Cholinergic | Benztropine mesylate                                           | 46 | -1  | 21.5 | no  | no  | 0.759 | 0.997 |
| Cholinergic | Betaine aldehyde chloride                                      | 47 | -4  | 20.8 | no  | no  | 0.599 | 0.997 |
| Cholinergic | Bethanechol chloride                                           | 48 | 7   | 23.2 | no  | no  | 0.367 | 0.937 |
| Cholinergic | Bromoacetylcholine bromide                                     | 43 | -14 | 18.6 | no  | no  | 0.107 | 0.571 |
| Cholinergic | BW 284c51                                                      | 45 | -19 | 17.8 | no  | no  | 0.024 | 0.235 |
| Cholinergic | Carbachol                                                      | 45 | 5   | 22.7 | no  | no  | 0.709 | 0.997 |
| Cholinergic | Choline bromide                                                | 32 | 2   | 22.2 | no  | no  | 0.866 | 0.997 |
| Cholinergic | DBO-83                                                         | 36 | 5   | 21.9 | no  | no  | 0.687 | 0.997 |
| Cholinergic | Decamethonium dibromide                                        | 46 | 9   | 23.3 | yes | no  | 0.096 | 0.555 |
| Cholinergic | Dicyclomine hydrochloride                                      | 46 | 10  | 23.1 | yes | no  | 0.036 | 0.304 |
| Cholinergic | Dihydro-beta-erythroidine hydrobromide                         | 46 | 13  | 23.7 | yes | no  | 0.119 | 0.606 |
| Cholinergic | DL-Homatropine hydrobromide                                    | 47 | -6  | 18.7 | no  | no  | 0.808 | 0.997 |
| Cholinergic | Edrophonium chloride                                           | 39 | -9  | 18.4 | no  | no  | 0.403 | 0.957 |
| Cholinergic | Gallamine triethiodide                                         | 49 | -4  | 19.5 | no  | no  | 0.634 | 0.997 |
| Cholinergic | Hemicholinium-3                                                | 39 | 8   | 21.5 | no  | no  | 0.291 | 0.862 |
| Cholinergic | Hexahydro-sila-difenidol hydrochloride                         | 43 | 25  | 24.9 | yes | yes | 0.007 | 0.094 |
| Cholinergic | Hexamethonium bromide                                          | 29 | 26  | 25.2 | yes | no  | 0.085 | 0.524 |
| Cholinergic | Hexamethonium dichloride                                       | 44 | 21  | 24.1 | yes | no  | 0.083 | 0.511 |
| Cholinergic | Hydroxytacrine maleate                                         | 46 | 4   | 20.7 | no  | no  | 0.471 | 0.995 |
| Cholinergic | Ipratropium bromide                                            | 44 | 16  | 23.0 | yes | no  | 0.070 | 0.462 |
| Cholinergic | Ivermectin                                                     | 36 | -60 | 8.3  | no  | no  | 0.000 | 0.000 |
| Cholinergic | Karakoline                                                     | 40 | 0   | 20.7 | no  | no  | 0.984 | 0.997 |
| Cholinergic | L-Hyoscyamine                                                  | 36 | 1   | 20.2 | no  | no  | 0.564 | 0.997 |
| Cholinergic | Linopirdine                                                    | 30 | -8  | 18.8 | no  | no  | 0.635 | 0.997 |
| Cholinergic | McN-A-343                                                      | 47 | -5  | 20.6 | no  | no  | 0.907 | 0.997 |
| Cholinergic | Mecamylamine hydrochloride                                     | 41 | 4   | 21.9 | no  | no  | 0.829 | 0.997 |
| Cholinergic | Methoctramine tetrahydrochloride                               | 43 | -1  | 20.9 | no  | no  | 0.826 | 0.997 |
| Cholinergic | Methylcarbamylocholine chloride                                | 53 | -10 | 19.0 | no  | no  | 0.234 | 0.787 |
| Cholinergic | MG 624                                                         | 43 | -24 | 15.6 | no  | no  | 0.002 | 0.039 |
| Cholinergic | N,N,N-trimethyl-1-(4-trans-stilbenoxy)-2-propylammonium iodide | 53 | -16 | 17.7 | no  | no  | 0.015 | 0.174 |
| Cholinergic | Neostigmine bromide                                            | 39 | -11 | 19.0 | no  | no  | 0.263 | 0.829 |
| Cholinergic | Orphenadrine hydrochloride                                     | 48 | -3  | 20.6 | no  | no  | 0.785 | 0.997 |
| Cholinergic | OXA-22 iodide                                                  | 54 | -5  | 20.4 | no  | no  | 0.588 | 0.997 |
| Cholinergic | Oxotremorine methiodide                                        | 41 | -9  | 19.2 | no  | no  | 0.090 | 0.530 |
| Cholinergic | Oxotremorine sesquifumarate salt                               | 30 | 6   | 22.5 | no  | no  | 0.996 | 1.000 |
| Cholinergic | Oxybutynin Chloride                                            | 31 | 5   | 22.3 | no  | no  | 0.503 | 0.996 |
| Cholinergic | Pancuronium bromide                                            | 43 | 8   | 22.8 | no  | no* | 0.138 | 0.657 |
| Cholinergic | Pentolinium di[L(+)-tartrate]                                  | 30 | 2   | 21.5 | no  | no  | 0.555 | 0.997 |
| Cholinergic | Pilocarpine nitrate                                            | 49 | -4  | 20.2 | no  | no  | 0.766 | 0.997 |
| Cholinergic | Pirenzepine dihydrochloride                                    | 42 | 4   | 21.3 | no  | no  | 0.640 | 0.997 |
| Cholinergic | PNU-282987                                                     | 36 | 3   | 21.8 | no  | no  | 0.922 | 0.997 |
| Cholinergic | Propantheline bromide                                          | 45 | -3  | 20.0 | no  | no  | 0.420 | 0.968 |
| Cholinergic | Propofol                                                       | 24 | 21  | 25.4 | no  | no* | 0.271 | 0.836 |

|                    |                                                       |    |     |      |     |       |       |       |
|--------------------|-------------------------------------------------------|----|-----|------|-----|-------|-------|-------|
| Cholinergic        | Pyridostigmine bromide                                | 49 | -8  | 18.9 | no  | no    | 0.163 | 0.700 |
| Cholinergic        | Succinylcholine chloride                              | 46 | -10 | 18.8 | no  | no    | 0.131 | 0.635 |
| Cholinergic        | Telenzepine dihydrochloride                           | 40 | -6  | 19.6 | no  | no    | 0.805 | 0.997 |
| Cholinergic        | Tetraethylammonium chloride                           | 36 | -4  | 20.3 | no  | no    | 0.351 | 0.925 |
| Cholinergic        | TMPH hydrochloride                                    | 43 | 4   | 21.4 | no  | no    | 0.635 | 0.997 |
| Cholinergic        | Trihexyphenidyl hydrochloride                         | 30 | 7   | 22.7 | yes | no    | 0.090 | 0.530 |
| Cholinergic        | Tropicamide                                           | 61 | 3   | 21.6 | no  | no    | 0.371 | 0.939 |
| Cholinergic        | WB 64                                                 | 36 | 13  | 23.5 | yes | no    | 0.061 | 0.432 |
| Cl- Channel        | 5-Nitro-2-(3-phenylpropylamino)benzoic acid           | 37 | 11  | 23.4 | yes | no    | 0.046 | 0.365 |
| Cl- Channel        | N-Phenylanthranilic acid                              | 41 | -10 | 20.4 | no  | no    | 0.030 | 0.269 |
| Cl- Channel        | R(+)-IAA-94                                           | 42 | -5  | 19.6 | no  | no    | 0.727 | 0.997 |
| Cyclic Nucleotides | 8-(4-Chlorophenylthio)-cAMP sodium                    | 39 | 5   | 22.9 | no  | no    | 0.747 | 0.997 |
| Cyclic Nucleotides | 8-Bromo-cAMP sodium                                   | 39 | -2  | 21.3 | no  | no    | 0.511 | 0.996 |
| Cyclic Nucleotides | 8-Bromo-cGMP sodium                                   | 41 | -3  | 21.2 | no  | no    | 0.554 | 0.997 |
| Cyclic Nucleotides | 8-Methoxymethyl-3-isobutyl-1-methylxanthine           | 39 | 7   | 22.1 | no  | no    | 0.382 | 0.946 |
| Cyclic Nucleotides | 9-cyclopentyladenine                                  | 43 | 7   | 23.4 | no  | no    | 0.973 | 0.997 |
| Cyclic Nucleotides | BRL 50481                                             | 27 | 26  | 25.1 | yes | yes   | 0.036 | 0.304 |
| Cyclic Nucleotides | BRL 50481                                             | 46 | 13  | 24.5 | yes | yes** | 0.081 | 0.502 |
| Cyclic Nucleotides | Cilostamide                                           | 26 | 10  | 23.8 | no  | no    | 0.479 | 0.996 |
| Cyclic Nucleotides | Cilostazol                                            | 53 | 9   | 23.7 | no  | no    | 0.172 | 0.717 |
| Cyclic Nucleotides | Enoximone                                             | 29 | -10 | 18.8 | no  | no    | 0.585 | 0.997 |
| Cyclic Nucleotides | Forskolin                                             | 42 | -8  | 18.7 | no  | no    | 0.307 | 0.885 |
| Cyclic Nucleotides | Ibudilast                                             | 45 | 2   | 20.4 | no  | no    | 1.000 | 1.000 |
| Cyclic Nucleotides | Imazodan                                              | 43 | -2  | 19.5 | no  | no    | 0.975 | 0.997 |
| Cyclic Nucleotides | Isoliquirigenin                                       | 34 | 9   | 22.6 | yes | no    | 0.121 | 0.610 |
| Cyclic Nucleotides | Milrinone                                             | 42 | 12  | 23.1 | yes | no    | 0.047 | 0.368 |
| Cyclic Nucleotides | Na-p-Tosyl-L-lysine chloromethyl ketone hydrochloride | 34 | -13 | 18.5 | no  | no    | 0.855 | 0.997 |
| Cyclic Nucleotides | NS 2028                                               | 42 | 3   | 21.7 | no  | no    | 0.315 | 0.897 |
| Cyclic Nucleotides | ODQ                                                   | 55 | 3   | 21.7 | no  | no    | 0.277 | 0.843 |
| Cyclic Nucleotides | Olprinone hydrochloride                               | 63 | 1   | 21.0 | no  | no    | 0.842 | 0.997 |
| Cyclic Nucleotides | Papaverine hydrochloride                              | 49 | 6   | 22.5 | yes | no    | 0.020 | 0.207 |
| Cyclic Nucleotides | Pentoxifylline                                        | 43 | -5  | 20.0 | no  | no    | 0.503 | 0.996 |
| Cyclic Nucleotides | Protoporphyrin IX disodium                            | 43 | -32 | 13.9 | no  | no    | 0.000 | 0.000 |
| Cyclic Nucleotides | Quazinine                                             | 37 | 13  | 23.2 | no  | no    | 0.155 | 0.684 |
| Cyclic Nucleotides | Quercetin dihydrate                                   | 52 | 0   | 20.6 | no  | no    | 0.390 | 0.950 |
| Cyclic Nucleotides | Ro 20-1724                                            | 38 | 4   | 22.6 | no  | no    | 0.217 | 0.779 |
| Cyclic Nucleotides | Rolipram                                              | 47 | -6  | 19.5 | no  | no    | 0.377 | 0.945 |
| Cyclic Nucleotides | SKF 94836                                             | 37 | -1  | 20.4 | no  | no    | 0.559 | 0.997 |
| Cyclic Nucleotides | SQ 22536                                              | 43 | 4   | 22.1 | no  | no    | 0.981 | 0.997 |
| Cyclic Nucleotides | T-0156                                                | 50 | 4   | 21.7 | no  | no    | 0.978 | 0.997 |
| Cyclic Nucleotides | T-1032                                                | 33 | 3   | 21.6 | no  | no    | 0.835 | 0.997 |
| Cyclic Nucleotides | Trequinsin hydrochloride                              | 52 | 14  | 24.3 | yes | yes   | 0.008 | 0.107 |
| Cyclic Nucleotides | Vinpocetine                                           | 25 | 17  | 24.4 | yes | yes   | 0.018 | 0.187 |
| Cyclic Nucleotides | YC-1                                                  | 28 | -6  | 19.6 | no  | no    | 0.519 | 0.997 |
| Cyclic Nucleotides | Zaprinast                                             | 54 | -3  | 20.2 | no  | no    | 0.794 | 0.997 |



|                      |                                                   |    |     |      |     |     |       |       |
|----------------------|---------------------------------------------------|----|-----|------|-----|-----|-------|-------|
| Cyclic Nucleotides   | Zardaverine                                       | 27 | 7   | 22.3 | yes | no  | 0.124 | 0.619 |
| Cytoskeleton and ECM | (±)-Thalidomide                                   | 27 | 6   | 22.0 | no  | no  | 0.862 | 0.997 |
| Cytoskeleton and ECM | 2,3-Butanedione                                   | 28 | 3   | 22.0 | no  | no  | 0.920 | 0.997 |
| Cytoskeleton and ECM | Brefeldin A from <i>Penicillium brefeldianum</i>  | 41 | -2  | 21.2 | no  | no  | 0.938 | 0.997 |
| Cytoskeleton and ECM | Clodronic acid                                    | 47 | 6   | 22.8 | no  | no  | 0.390 | 0.950 |
| Cytoskeleton and ECM | Colchicine                                        | 31 | -7  | 20.3 | no  | no  | 0.561 | 0.997 |
| Cytoskeleton and ECM | Nocodazole                                        | 48 | -31 | 14.2 | no  | no  | 0.000 | 0.000 |
| Cytoskeleton and ECM | Podophyllotoxin                                   | 30 | 6   | 22.4 | no  | no  | 0.726 | 0.997 |
| Cytoskeleton and ECM | Taxol                                             | 33 | -40 | 12.5 | no  | no  | 0.000 | 0.000 |
| Cytoskeleton and ECM | Vinblastine sulfate salt                          | 28 | 6   | 22.1 | no  | no  | 0.975 | 0.997 |
| Cytoskeleton and ECM | Vincristine sulfate                               | 33 | 19  | 24.8 | yes | yes | 0.033 | 0.285 |
| DNA                  | Carboplatin                                       | 31 | 0   | 21.7 | no  | no  | 0.662 | 0.997 |
| DNA                  | Carmustine                                        | 48 | -11 | 19.2 | no  | no  | 0.336 | 0.910 |
| DNA                  | CB 1954                                           | 50 | -11 | 19.2 | no  | no  | 0.196 | 0.754 |
| DNA                  | Chlorambucil                                      | 41 | 11  | 24.1 | no  | no  | 0.224 | 0.787 |
| DNA                  | Chloroquine diphosphate                           | 47 | -2  | 21.3 | no  | no  | 0.953 | 0.997 |
| DNA                  | Cisplatin                                         | 40 | -5  | 20.1 | no  | no  | 0.973 | 0.997 |
| DNA                  | Cyclophosphamide monohydrate                      | 50 | 0   | 21.6 | no  | no  | 0.841 | 0.997 |
| DNA                  | Nimustine hydrochloride                           | 40 | -2  | 20.7 | no  | no  | 0.654 | 0.997 |
| DNA                  | Phosphonoacetic acid                              | 41 | -5  | 19.5 | no  | no  | 0.346 | 0.923 |
| DNA Metabolism       | 5-azacytidine                                     | 53 | -14 | 19.7 | no  | no  | 0.120 | 0.607 |
| DNA Metabolism       | 5-Bromo-2'-deoxyuridine                           | 41 | 0   | 21.7 | no  | no  | 0.933 | 0.997 |
| DNA Metabolism       | 5-fluoro-5'-deoxyuridine                          | 35 | 7   | 21.7 | no  | no  | 0.588 | 0.997 |
| DNA Metabolism       | Altretamine                                       | 52 | -14 | 18.8 | no  | no  | 0.111 | 0.582 |
| DNA Metabolism       | Ancitabine hydrochloride                          | 34 | 9   | 23.9 | no  | no  | 0.654 | 0.997 |
| DNA Metabolism       | Azelaic acid                                      | 52 | -7  | 21.2 | no  | no  | 0.165 | 0.705 |
| DNA Metabolism       | Cytosine-1-beta-D-arabinofuranoside hydrochloride | 34 | 8   | 23.5 | no  | no  | 0.214 | 0.776 |
| DNA Metabolism       | Hydroxyurea                                       | 33 | -1  | 19.8 | no  | no  | 0.960 | 0.997 |
| DNA Metabolism       | Idarubicin                                        | 52 | 14  | 22.8 | no  | no  | 0.448 | 0.985 |
| DNA Metabolism       | Melphalan                                         | 41 | -6  | 19.3 | no  | no  | 0.438 | 0.985 |
| DNA Metabolism       | Methotrexate                                      | 42 | -6  | 21.4 | no  | no  | 0.500 | 0.996 |
| DNA Metabolism       | Mitoxantrone                                      | 31 | 16  | 23.8 | no  | no* | 0.160 | 0.697 |
| DNA Metabolism       | Mizoribine                                        | 43 | -1  | 20.4 | no  | no  | 0.467 | 0.995 |
| DNA Repair           | Amsacrine hydrochloride                           | 46 | 6   | 23.2 | no  | no  | 0.137 | 0.654 |
| DNA Repair           | O6-benzylguanine                                  | 50 | -9  | 19.7 | no  | no  | 0.197 | 0.754 |
| DNA Repair           | p-Benzoquinone                                    | 33 | 13  | 24.6 | no  | no  | 0.405 | 0.959 |
| Dopamine             | (-)-Quinpirole hydrochloride                      | 58 | 2   | 21.1 | no  | no  | 0.750 | 0.997 |
| Dopamine             | (-)-Sulpiride                                     | 42 | 2   | 21.4 | no  | no  | 0.723 | 0.997 |
| Dopamine             | (+)-Bromocriptine methanesulfonate                | 30 | 15  | 24.9 | no  | no* | 0.460 | 0.993 |
| Dopamine             | (±)-6-Chloro-PB hydrobromide                      | 33 | 18  | 25.0 | yes | no  | 0.022 | 0.220 |
| Dopamine             | (±)-7-Hydroxy-DPAT hydrobromide                   | 51 | 10  | 21.9 | no  | no  | 0.142 | 0.661 |

|          |                                                 |    |     |      |     |     |       |       |
|----------|-------------------------------------------------|----|-----|------|-----|-----|-------|-------|
| Dopamine | (±)-Butaclamol hydrochloride                    | 38 | -10 | 19.4 | no  | no  | 0.017 | 0.186 |
| Dopamine | (±)-Chloro-APB hydrobromide                     | 34 | -14 | 18.4 | no  | no  | 0.075 | 0.477 |
| Dopamine | (±)-Octoclothepein maleate                      | 39 | 33  | 28.1 | yes | yes | 0.000 | 0.000 |
| Dopamine | (±)-PD 128,907 hydrochloride                    | 34 | 4   | 21.4 | no  | no  | 0.461 | 0.993 |
| Dopamine | (±)-PPHT hydrochloride                          | 30 | -5  | 19.5 | no  | no  | 0.791 | 0.997 |
| Dopamine | (±)-Quinpirole dihydrochloride                  | 40 | 0   | 20.6 | no  | no  | 0.813 | 0.997 |
| Dopamine | (±)-SKF 38393, N-allyl-, hydrobromide           | 39 | 5   | 22.2 | no  | no  | 0.926 | 0.997 |
| Dopamine | (±)-SKF-38393 hydrochloride                     | 48 | 5   | 22.1 | no  | no  | 0.197 | 0.754 |
| Dopamine | (±)-Sulpiride                                   | 34 | -3  | 20.3 | no  | no  | 0.784 | 0.997 |
| Dopamine | 1-(4-Hydroxybenzyl)imidazole-2-thiol            | 38 | 13  | 22.5 | no  | no  | 0.174 | 0.717 |
| Dopamine | 1-Phenyl-3-(2-thiazolyl)-2-thiourea             | 32 | -21 | 16.7 | no  | no  | 0.015 | 0.172 |
| Dopamine | 3,4-Dihydroxyphenylacetic acid                  | 46 | -1  | 20.7 | no  | no  | 0.821 | 0.997 |
| Dopamine | 3-Methoxy-4-hydroxyphenethylamine hydrochloride | 38 | -1  | 20.5 | no  | no  | 0.901 | 0.997 |
| Dopamine | 3-Phenylpropargylamine hydrochloride            | 40 | -1  | 20.4 | no  | no  | 0.539 | 0.997 |
| Dopamine | 4-Hydroxy-3-methoxyphenylacetic acid            | 36 | 9   | 21.6 | no  | no  | 0.400 | 0.957 |
| Dopamine | 4-Hydroxyphenethylamine hydrochloride           | 36 | 2   | 21.8 | no  | no  | 0.883 | 0.997 |
| Dopamine | 4-Methoxy-3-hydroxyphenethylamine hydrochloride | 29 | 14  | 22.7 | no  | no  | 0.385 | 0.948 |
| Dopamine | 6,7-ADTN hydrobromide                           | 37 | 12  | 23.4 | no  | no  | 0.284 | 0.857 |
| Dopamine | A-77636 hydrochloride                           | 41 | 1   | 22.1 | no  | no  | 0.984 | 0.997 |
| Dopamine | Amantadine hydrochloride                        | 51 | -1  | 22.6 | no  | no  | 0.809 | 0.997 |
| Dopamine | Apomorphine hydrochloride hemihydrate           | 43 | -2  | 22.3 | no  | no  | 0.907 | 0.997 |
| Dopamine | BP 897                                          | 39 | 3   | 22.4 | yes | no  | 0.061 | 0.432 |
| Dopamine | BTCP hydrochloride                              | 51 | 22  | 26.4 | yes | yes | 0.000 | 0.002 |
| Dopamine | Bupropion hydrochloride                         | 33 | 7   | 23.3 | no  | no  | 0.224 | 0.787 |
| Dopamine | Chlorpromazine hydrochloride                    | 33 | -34 | 14.2 | no  | no  | 0.000 | 0.000 |
| Dopamine | Chlorprothixene hydrochloride                   | 43 | 50  | 32.5 | yes | yes | 0.000 | 0.000 |
| Dopamine | cis(+/-)-8-OH-PBZI hydrobromide                 | 37 | 1   | 20.8 | no  | no  | 0.640 | 0.997 |
| Dopamine | cis-(Z)-Flupenthixol dihydrochloride            | 38 | 48  | 30.0 | yes | yes | 0.000 | 0.001 |
| Dopamine | Clozapine                                       | 39 | 19  | 25.9 | no  | no  | 0.136 | 0.650 |
| Dopamine | Cortexolone maleate                             | 47 | 16  | 24.3 | yes | yes | 0.000 | 0.000 |
| Dopamine | Dihydroxidine hydrochloride                     | 37 | 12  | 23.9 | no  | no  | 0.482 | 0.996 |
| Dopamine | Dihydroergocristine methanesulfonate            | 32 | 40  | 29.4 | yes | yes | 0.000 | 0.001 |
| Dopamine | Dipropyldopamine hydrobromide                   | 45 | -13 | 18.2 | no  | no  | 0.225 | 0.787 |
| Dopamine | Domperidone                                     | 49 | 6   | 22.1 | no  | no  | 0.142 | 0.661 |
| Dopamine | Dopamine hydrochloride                          | 46 | 5   | 20.9 | no  | no  | 0.626 | 0.997 |
| Dopamine | Droperidol                                      | 43 | 8   | 23.1 | no  | no  | 0.173 | 0.717 |
| Dopamine | Fenoldopam bromide                              | 42 | 7   | 21.6 | no  | no  | 0.768 | 0.997 |
| Dopamine | Fluphenazine dihydrochloride                    | 57 | 16  | 23.5 | no  | no  | 0.371 | 0.939 |
| Dopamine | Fluspirilene                                    | 49 | -44 | 11.4 | no  | no  | 0.000 | 0.000 |
| Dopamine | Fusaric acid                                    | 40 | -7  | 18.8 | no  | no  | 0.196 | 0.754 |
| Dopamine | GBR-12909 dihydrochloride                       | 45 | 13  | 23.6 | yes | no  | 0.070 | 0.462 |
| Dopamine | GBR-12935 dihydrochloride                       | 44 | 21  | 24.4 | yes | no  | 0.006 | 0.088 |
| Dopamine | GYKI 52895                                      | 42 | 7   | 21.3 | no  | no  | 0.299 | 0.871 |
| Dopamine | Haloperidol                                     | 33 | -8  | 18.3 | no  | no  | 0.289 | 0.861 |

|          |                                                                  |    |     |      |     |     |       |       |
|----------|------------------------------------------------------------------|----|-----|------|-----|-----|-------|-------|
| Dopamine | Indatraline hydrochloride                                        | 23 | -4  | 19.9 | no  | no  | 0.322 | 0.904 |
| Dopamine | JHW 007 hydrochloride                                            | 43 | -25 | 15.7 | no  | no  | 0.000 | 0.002 |
| Dopamine | JL-18                                                            | 36 | 6   | 21.9 | no  | no  | 0.204 | 0.760 |
| Dopamine | L-3,4-Dihydroxyphenylalanine                                     | 32 | 8   | 22.6 | no  | no  | 0.520 | 0.997 |
| Dopamine | L-3,4-Dihydroxyphenylalanine methyl ester hydrochloride          | 45 | 0   | 21.3 | no  | no  | 0.967 | 0.997 |
| Dopamine | L-741,626                                                        | 30 | -31 | 14.2 | no  | no  | 0.001 | 0.014 |
| Dopamine | L-745,870 hydrochloride                                          | 33 | -25 | 15.4 | no  | no  | 0.010 | 0.128 |
| Dopamine | L-750,667 trihydrochloride                                       | 43 | -43 | 11.7 | no  | no  | 0.000 | 0.000 |
| Dopamine | LE 300                                                           | 30 | -6  | 19.5 | no  | no  | 0.657 | 0.997 |
| Dopamine | Loxapine succinate                                               | 41 | 23  | 25.4 | yes | yes | 0.001 | 0.015 |
| Dopamine | Mesulergine hydrochloride                                        | 45 | -1  | 21.1 | no  | no  | 0.519 | 0.997 |
| Dopamine | Methylergonovine maleate                                         | 40 | 26  | 26.0 | yes | yes | 0.010 | 0.128 |
| Dopamine | Metoclopramide hydrochloride                                     | 27 | 21  | 24.9 | yes | no  | 0.070 | 0.462 |
| Dopamine | Molindone hydrochloride                                          | 40 | 4   | 21.6 | no  | no  | 0.396 | 0.953 |
| Dopamine | N-(2-[4-(4-Chlorophenyl)piperazin-1-yl]ethyl)-3-methoxybenzamide | 41 | 29  | 28.1 | yes | yes | 0.001 | 0.012 |
| Dopamine | N-Acetyldopamine monohydrate                                     | 38 | 6   | 23.1 | no  | no  | 0.802 | 0.997 |
| Dopamine | N-Methyldopamine hydrochloride                                   | 33 | -2  | 20.9 | no  | no  | 0.954 | 0.997 |
| Dopamine | Nomifensine maleate                                              | 44 | -9  | 19.2 | no  | no  | 0.154 | 0.681 |
| Dopamine | PD 168,077 maleate                                               | 40 | 11  | 22.8 | yes | no  | 0.023 | 0.228 |
| Dopamine | Pergolide methanesulfonate                                       | 37 | 32  | 27.2 | yes | yes | 0.000 | 0.000 |
| Dopamine | Perphenazine                                                     | 31 | -8  | 19.4 | no  | no  | 0.123 | 0.617 |
| Dopamine | Pimozide                                                         | 54 | -32 | 14.3 | no  | no  | 0.000 | 0.000 |
| Dopamine | Piribedil maleate                                                | 35 | 1   | 20.8 | no  | no  | 0.819 | 0.997 |
| Dopamine | Prochlorperazine dimaleate                                       | 48 | 2   | 21.0 | no  | no  | 0.403 | 0.957 |
| Dopamine | Promazine hydrochloride                                          | 33 | -14 | 17.7 | no  | no  | 0.010 | 0.132 |
| Dopamine | Propionylpromazine hydrochloride                                 | 46 | 24  | 25.6 | yes | yes | 0.000 | 0.003 |
| Dopamine | Quinelorane dihydrochloride                                      | 37 | 5   | 21.6 | no  | no  | 0.504 | 0.996 |
| Dopamine | R(-)-2,10,11-Trihydroxyaporphine hydrobromide                    | 50 | 15  | 24.1 | yes | no  | 0.005 | 0.068 |
| Dopamine | R(-)-2,10,11-Trihydroxy-N-propylnoraporphine hydrobromide        | 36 | 20  | 25.1 | yes | no  | 0.062 | 0.433 |
| Dopamine | R(-)-Apocodeine hydrochloride                                    | 27 | 25  | 26.2 | yes | no  | 0.017 | 0.187 |
| Dopamine | R(-)-N-Allylnorapomorphine hydrobromide                          | 38 | 2   | 21.5 | no  | no  | 0.513 | 0.996 |
| Dopamine | R(-)-Propylnorapomorphine hydrochloride                          | 54 | 17  | 24.6 | yes | no  | 0.002 | 0.032 |
| Dopamine | R(-)-SCH-12679 maleate                                           | 34 | -1  | 21.0 | no  | no  | 0.559 | 0.997 |
| Dopamine | R(+)-3PPP hydrochloride                                          | 37 | 5   | 21.6 | no  | no  | 0.665 | 0.997 |
| Dopamine | R(+)-6-Bromo-APB hydrobromide                                    | 33 | 6   | 22.9 | no  | no  | 0.808 | 0.997 |
| Dopamine | R(+)-7-Hydroxy-DPAT hydrobromide                                 | 41 | 3   | 20.5 | no  | no  | 0.820 | 0.997 |
| Dopamine | R(+)-SCH-23390 hydrochloride                                     | 25 | -1  | 20.7 | no  | no  | 0.608 | 0.997 |
| Dopamine | R(+)-Terguride                                                   | 38 | 18  | 24.7 | yes | no  | 0.025 | 0.239 |
| Dopamine | Risperidone                                                      | 39 | 14  | 23.8 | yes | no  | 0.100 | 0.560 |
| Dopamine | Ropinrole hydrochloride                                          | 32 | 2   | 21.3 | no  | no  | 0.775 | 0.997 |
| Dopamine | S(-)-3PPP hydrochloride                                          | 47 | 3   | 21.1 | no  | no  | 0.901 | 0.997 |
| Dopamine | S(-)-DS 121 hydrochloride                                        | 35 | -1  | 20.8 | no  | no  | 0.940 | 0.997 |
| Dopamine | S(-)-Eticlopride hydrochloride                                   | 37 | 14  | 23.1 | no  | no  | 0.124 | 0.619 |
| Dopamine | S(+)-PD 128,907 hydrochloride                                    | 32 | 5   | 21.6 | no  | no  | 0.609 | 0.997 |

|           |                                             |    |     |      |     |     |       |       |
|-----------|---------------------------------------------|----|-----|------|-----|-----|-------|-------|
| Dopamine  | S(+)-Raclopride L-tartrate                  | 41 | -4  | 20.0 | no  | no  | 0.652 | 0.997 |
| Dopamine  | SKF 75670 hydrobromide                      | 44 | 2   | 21.3 | no  | no  | 0.673 | 0.997 |
| Dopamine  | SKF 83565 hydrobromide                      | 36 | -2  | 20.5 | no  | no  | 0.511 | 0.996 |
| Dopamine  | SKF 83959 hydrobromide                      | 49 | -9  | 19.0 | no  | no  | 0.274 | 0.842 |
| Dopamine  | SKF 89626                                   | 44 | -7  | 19.5 | no  | no  | 0.817 | 0.997 |
| Dopamine  | Spiperone hydrochloride                     | 23 | 6   | 22.2 | no  | no  | 0.235 | 0.787 |
| Dopamine  | Thioridazine hydrochloride                  | 42 | 34  | 28.1 | yes | yes | 0.000 | 0.000 |
| Dopamine  | Thiothixene hydrochloride                   | 45 | 5   | 22.4 | no  | no  | 0.465 | 0.995 |
| Dopamine  | Tiapride hydrochloride                      | 39 | -3  | 20.6 | no  | no  | 0.688 | 0.997 |
| Dopamine  | Trifluoperazine dihydrochloride             | 41 | -8  | 19.1 | no  | no  | 0.225 | 0.787 |
| Dopamine  | Trifluperidol hydrochloride                 | 41 | -16 | 17.6 | no  | no  | 0.088 | 0.530 |
| Dopamine  | Triflupromazine hydrochloride               | 39 | -34 | 14.1 | no  | no  | 0.000 | 0.000 |
| Dopamine  | U-101958 maleate                            | 43 | 4   | 21.8 | no  | no  | 0.413 | 0.966 |
| Dopamine  | U-99194A maleate                            | 38 | 16  | 24.3 | yes | no  | 0.003 | 0.044 |
| G protein | (-)-Perillic acid                           | 45 | -6  | 19.2 | no  | no  | 0.550 | 0.997 |
| G protein | Farnesylthiosalicylic acid                  | 31 | -17 | 16.9 | no  | no  | 0.172 | 0.717 |
| G protein | SCH-202676 hydrobromide                     | 37 | -6  | 19.7 | no  | no  | 0.351 | 0.925 |
| GABA      | (-)-Bicuculline methbromide, 1(S), 9(R)     | 39 | 0   | 21.6 | no  | no  | 0.657 | 0.997 |
| GABA      | (+)-Hydrastine                              | 48 | 11  | 22.1 | no  | no  | 0.205 | 0.760 |
| GABA      | (±)-Baclofen                                | 38 | 1   | 21.9 | no  | no  | 0.934 | 0.997 |
| GABA      | (±)-gamma-Vinyl GABA                        | 50 | -4  | 20.1 | no  | no  | 0.753 | 0.997 |
| GABA      | (±)-Nipecotic acid                          | 40 | 1   | 22.9 | no  | no  | 0.594 | 0.997 |
| GABA      | (E)-4-amino-2-butenic acid                  | 41 | 7   | 22.8 | no  | no  | 0.385 | 0.948 |
| GABA      | 2-Hydroxysaclofen                           | 51 | 0   | 22.7 | no  | no  | 0.719 | 0.997 |
| GABA      | 3-alpha,21-Dihydroxy-5-alpha-pregnan-20-one | 38 | 2   | 21.6 | no  | no  | 0.444 | 0.985 |
| GABA      | 3-Amino-1-propanesulfonic acid sodium       | 39 | 8   | 24.6 | no  | no  | 0.330 | 0.904 |
| GABA      | 3-Aminopropylphosphonic acid                | 38 | 0   | 22.7 | no  | no  | 0.694 | 0.997 |
| GABA      | 5alpha-Pregnan-3alpha-ol-11,20-dione        | 33 | 4   | 21.9 | no  | no  | 0.735 | 0.997 |
| GABA      | 5alpha-Pregnan-3alpha-ol-20-one             | 34 | 20  | 24.6 | yes | no  | 0.047 | 0.368 |
| GABA      | 5-Aminovaleric acid hydrochloride           | 43 | -12 | 20.1 | no  | no  | 0.097 | 0.560 |
| GABA      | CGP-13501                                   | 37 | -3  | 21.1 | no  | no  | 0.579 | 0.997 |
| GABA      | CGP-7930                                    | 35 | 5   | 22.7 | no  | no  | 0.303 | 0.880 |
| GABA      | cis-4-Aminocrotonic acid                    | 25 | 2   | 22.3 | no  | no  | 0.962 | 0.997 |
| GABA      | Dehydroisoandrosterone 3-sulfate sodium     | 40 | 8   | 23.2 | no  | no  | 0.234 | 0.787 |
| GABA      | GABA                                        | 33 | -3  | 22.1 | no  | no  | 0.614 | 0.997 |
| GABA      | Gabaculine hydrochloride                    | 36 | 5   | 23.8 | no  | no  | 0.984 | 0.997 |
| GABA      | gamma-Acetylinic GABA                       | 41 | 4   | 22.8 | no  | no  | 0.709 | 0.997 |
| GABA      | Guvacine hydrochloride                      | 46 | 7   | 21.2 | no  | no  | 0.506 | 0.996 |
| GABA      | Imidazole-4-acetic acid hydrochloride       | 34 | 7   | 21.4 | no  | no  | 0.566 | 0.997 |
| GABA      | Isoguvacine hydrochloride                   | 52 | 1   | 20.2 | no  | no  | 0.990 | 0.999 |
| GABA      | Isonipecotic acid                           | 43 | -4  | 19.8 | no  | no  | 0.736 | 0.997 |
| GABA      | Muscimol hydrobromide                       | 40 | -2  | 19.6 | no  | no  | 0.874 | 0.997 |
| GABA      | NCS-356                                     | 30 | -2  | 20.7 | no  | no  | 0.588 | 0.997 |
| GABA      | NCS-382                                     | 43 | 2   | 21.6 | no  | no  | 0.513 | 0.996 |
| GABA      | N-Methyl-beta-carboline-3-carboxamide       | 39 | -6  | 19.0 | no  | no  | 0.528 | 0.997 |
| GABA      | NO-711 hydrochloride                        | 54 | 4   | 22.0 | no  | no  | 0.571 | 0.997 |

|           |                                                                   |    |     |      |     |          |       |       |
|-----------|-------------------------------------------------------------------|----|-----|------|-----|----------|-------|-------|
| GABA      | Phaclofen                                                         | 46 | 6   | 21.7 | no  | no       | 0.220 | 0.785 |
| GABA      | Picrotoxin                                                        | 39 | -1  | 20.9 | no  | no       | 0.624 | 0.997 |
| GABA      | Piperidine-4-sulphonic acid                                       | 41 | -2  | 20.2 | no  | no       | 0.995 | 1.000 |
| GABA      | PK 11195                                                          | 42 | 5   | 22.8 | no  | no       | 0.229 | 0.787 |
| GABA      | Pregnenolone sulfate sodium                                       | 43 | 5   | 21.7 | yes | previous | 0.105 | 0.563 |
| GABA      | SB 205384                                                         | 39 | -11 | 18.6 | no  | no       | 0.129 | 0.630 |
| GABA      | SKF 89976A hydrochloride                                          | 43 | -9  | 19.4 | no  | no       | 0.196 | 0.754 |
| GABA      | SKF 97541 hydrochloride                                           | 49 | -1  | 21.6 | no  | no       | 0.898 | 0.997 |
| GABA      | SR-95531                                                          | 36 | -7  | 19.8 | no  | no       | 0.256 | 0.820 |
| GABA      | THIP hydrochloride                                                | 33 | -3  | 20.2 | no  | no       | 0.615 | 0.997 |
| GABA      | TPMPA                                                             | 38 | -2  | 20.4 | no  | no       | 0.749 | 0.997 |
| GABA      | Xli 093 hydrate                                                   | 43 | 6   | 23.3 | no  | no       | 0.617 | 0.997 |
| Glutamate | (-)-MK-801 hydrogen maleate                                       | 44 | 3   | 21.8 | no  | no       | 0.328 | 0.904 |
| Glutamate | (+)-MK-801 hydrogen maleate                                       | 39 | -5  | 20.1 | no  | no       | 0.482 | 0.996 |
| Glutamate | (+)-Quisqualic acid                                               | 44 | 7   | 22.1 | no  | no       | 0.600 | 0.997 |
| Glutamate | (±)-2-Amino-3-phosphonopropionic acid                             | 28 | 10  | 25.1 | no  | no       | 0.259 | 0.824 |
| Glutamate | (±)-2-Amino-4-phosphonobutyric acid                               | 53 | -7  | 21.2 | no  | no       | 0.292 | 0.864 |
| Glutamate | (±)-2-Amino-5-phosphonopentanoic acid                             | 36 | 2   | 23.3 | no  | no       | 0.887 | 0.997 |
| Glutamate | (±)-2-Amino-7-phosphonoheptanoic acid                             | 31 | -5  | 21.7 | no  | no       | 0.425 | 0.973 |
| Glutamate | (±)-alpha-Methyl-4-carboxyphenylglycine                           | 37 | 12  | 23.0 | no  | no       | 0.394 | 0.951 |
| Glutamate | (±)-AMPA hydrobromide                                             | 38 | 1   | 20.1 | no  | no       | 0.945 | 0.997 |
| Glutamate | (±)-cis-Piperidine-2,3-dicarboxylic acid                          | 55 | 5   | 21.6 | no  | no       | 0.168 | 0.710 |
| Glutamate | (±)-CPP                                                           | 37 | -8  | 19.7 | no  | no       | 0.615 | 0.997 |
| Glutamate | (±)-HA-966                                                        | 44 | -10 | 19.8 | no  | no       | 0.259 | 0.824 |
| Glutamate | (±)-Ibotenic acid                                                 | 37 | 7   | 22.2 | no  | no       | 0.189 | 0.743 |
| Glutamate | (2S,1'S,2'S)-2-(carboxycyclopropyl)glycine                        | 46 | 3   | 22.0 | no  | no       | 0.802 | 0.997 |
| Glutamate | (S)-3,5-Dihydroxyphenylglycine                                    | 45 | -6  | 20.2 | no  | no       | 0.911 | 0.997 |
| Glutamate | (S)-MAP4 hydrochloride                                            | 33 | 2   | 20.9 | no  | no       | 0.905 | 0.997 |
| Glutamate | 1,10-Diaminodecane                                                | 45 | -6  | 19.6 | no  | no       | 0.665 | 0.997 |
| Glutamate | 1-Aminocyclopropanecarboxylic acid hydrochloride                  | 48 | -2  | 22.3 | no  | no       | 0.770 | 0.997 |
| Glutamate | 2,6-Difluoro-4-[2-(phenylsulfonylamino)ethylthio]phenoxyacetamide | 48 | 2   | 21.0 | no  | no       | 0.472 | 0.995 |
| Glutamate | 3-Methoxy-morphanin hydrochloride                                 | 31 | 1   | 21.5 | no  | no       | 0.728 | 0.997 |
| Glutamate | 5,7-Dichlorokynurenic acid                                        | 42 | 3   | 21.6 | no  | no       | 0.830 | 0.997 |
| Glutamate | 5-Fluoroindole-2-carboxylic acid                                  | 46 | 3   | 23.4 | no  | no       | 0.818 | 0.997 |
| Glutamate | 6,7-Dichloroquinoxaline-2,3-dione                                 | 34 | 1   | 21.2 | no  | no       | 0.947 | 0.997 |
| Glutamate | 6-Methyl-2-(phenylethynyl)pyridine hydrochloride                  | 41 | -14 | 17.8 | no  | no       | 0.035 | 0.297 |
| Glutamate | 7-Chlorokynurenic acid                                            | 36 | -3  | 20.7 | no  | no       | 0.613 | 0.997 |
| Glutamate | AIDA                                                              | 41 | -2  | 21.4 | no  | no       | 0.665 | 0.997 |
| Glutamate | AMN082                                                            | 43 | 16  | 24.7 | yes | yes      | 0.000 | 0.006 |
| Glutamate | Aniracetam                                                        | 42 | 0   | 21.8 | no  | no       | 0.893 | 0.997 |
| Glutamate | Arcaïne sulfate                                                   | 44 | -2  | 22.3 | no  | no       | 0.973 | 0.997 |
| Glutamate | ATPA                                                              | 39 | -5  | 20.7 | no  | no       | 0.212 | 0.776 |
| Glutamate | ATPO                                                              | 44 | -4  | 21.0 | no  | no       | 0.671 | 0.997 |

|           |                                           |    |    |      |     |     |       |       |
|-----------|-------------------------------------------|----|----|------|-----|-----|-------|-------|
| Glutamate | Chelidamic acid                           | 47 | 5  | 22.9 | no  | no  | 0.481 | 0.996 |
| Glutamate | cis-Azetidine-2,4-dicarboxylic acid       | 35 | -1 | 21.6 | no  | no  | 0.711 | 0.997 |
| Glutamate | CNQX disodium                             | 33 | 0  | 21.4 | no  | no  | 0.346 | 0.923 |
| Glutamate | CNS-1102                                  | 43 | 7  | 23.3 | yes | no  | 0.099 | 0.560 |
| Glutamate | CPCCOEt                                   | 31 | 7  | 23.3 | no  | no  | 0.368 | 0.937 |
| Glutamate | CR 2249                                   | 41 | 1  | 21.4 | no  | no  | 0.635 | 0.997 |
| Glutamate | CX 546                                    | 43 | -1 | 21.3 | no  | no  | 0.819 | 0.997 |
| Glutamate | Cyclothiazide                             | 35 | 14 | 24.4 | no  | no  | 0.196 | 0.754 |
| Glutamate | Cystamine dihydrochloride                 | 50 | -5 | 20.7 | no  | no  | 0.555 | 0.997 |
| Glutamate | D(-)-2-Amino-7-phosphonoheptanoic acid    | 33 | -3 | 21.2 | no  | no  | 0.495 | 0.996 |
| Glutamate | D-Cycloserine                             | 37 | -4 | 20.8 | no  | no  | 0.829 | 0.997 |
| Glutamate | Dextromethorphan hydrobromide monohydrate | 37 | 15 | 24.6 | no  | no  | 0.330 | 0.904 |
| Glutamate | Dextrorphan D-tartrate                    | 50 | -3 | 20.2 | no  | no  | 0.723 | 0.997 |
| Glutamate | DFB                                       | 32 | -1 | 21.1 | no  | no  | 0.812 | 0.997 |
| Glutamate | Dihydrokainic acid                        | 47 | 3  | 22.0 | no  | no  | 0.744 | 0.997 |
| Glutamate | DL-threo-beta-hydroxyaspartic acid        | 43 | -4 | 19.1 | no  | no  | 0.809 | 0.997 |
| Glutamate | DNQX                                      | 42 | 4  | 22.2 | no  | no  | 0.572 | 0.997 |
| Glutamate | D-Serine                                  | 36 | 0  | 20.8 | no  | no  | 0.929 | 0.997 |
| Glutamate | Eliprodil                                 | 43 | 17 | 24.5 | yes | yes | 0.070 | 0.462 |
| Glutamate | Felbamate                                 | 41 | 2  | 20.7 | no  | no  | 0.879 | 0.997 |
| Glutamate | Flupirtine maleate                        | 42 | 5  | 21.3 | no  | no  | 0.444 | 0.985 |
| Glutamate | gamma-D-Glutamylaminomethylsulfonic acid  | 36 | 11 | 22.0 | no  | no  | 0.242 | 0.797 |
| Glutamate | GYKI 52466 hydrochloride                  | 40 | 12 | 22.2 | no  | no  | 0.363 | 0.937 |
| Glutamate | IEM-1460                                  | 44 | 9  | 21.7 | no  | no  | 0.373 | 0.940 |
| Glutamate | Ifenprodil tartrate                       | 42 | 3  | 21.4 | no  | no  | 0.511 | 0.996 |
| Glutamate | Kainic acid                               | 48 | -3 | 20.0 | no  | no  | 0.976 | 0.997 |
| Glutamate | Kynurenic acid                            | 43 | -7 | 19.2 | no  | no  | 0.451 | 0.988 |
| Glutamate | L-2-aminoadipic acid                      | 36 | -4 | 21.1 | no  | no  | 0.511 | 0.996 |
| Glutamate | L-701,324                                 | 50 | 3  | 21.4 | no  | no  | 0.591 | 0.997 |
| Glutamate | L-Aspartic acid                           | 46 | 1  | 22.0 | no  | no  | 0.916 | 0.997 |
| Glutamate | L-Cysteinesulfinic Acid                   | 45 | -5 | 20.7 | no  | no  | 0.696 | 0.997 |
| Glutamate | L-Glutamic acid hydrochloride             | 47 | -5 | 19.3 | no  | no  | 0.437 | 0.985 |
| Glutamate | L-Glutamic acid, N-phthaloyl-             | 32 | -2 | 20.7 | no  | no  | 0.912 | 0.997 |
| Glutamate | L-Glutamine                               | 44 | -3 | 19.6 | no  | no  | 0.770 | 0.997 |
| Glutamate | L-Methionine sulfoximine                  | 37 | 3  | 21.2 | no  | no  | 0.884 | 0.997 |
| Glutamate | MDL 105,519                               | 44 | -4 | 20.4 | no  | no  | 0.570 | 0.997 |
| Glutamate | MDL 26,630 trihydrochloride               | 36 | 5  | 22.3 | no  | no  | 0.291 | 0.862 |
| Glutamate | Memantine hydrochloride                   | 42 | -5 | 20.1 | no  | no  | 0.820 | 0.997 |
| Glutamate | N-(3,3-Diphenylpropyl)glycinamide         | 49 | -1 | 20.0 | no  | no  | 0.864 | 0.997 |
| Glutamate | N-Acetyl-L-Cysteine                       | 26 | 0  | 21.9 | no  | no  | 0.798 | 0.997 |
| Glutamate | NBQX disodium                             | 41 | 1  | 21.4 | no  | no  | 0.362 | 0.937 |
| Glutamate | N-Methyl-D-aspartic acid                  | 48 | 1  | 20.7 | no  | no  | 0.350 | 0.925 |
| Glutamate | NS 521 oxalate                            | 34 | 13 | 23.9 | yes | no  | 0.013 | 0.165 |
| Glutamate | O-Phospho-L-serine                        | 40 | -8 | 19.5 | no  | no  | 0.089 | 0.530 |
| Glutamate | Pentamidine isethionate                   | 33 | -1 | 20.9 | no  | no  | 0.872 | 0.997 |
| Glutamate | Phthalamoyl-L-glutamic acid trisodium     | 42 | 1  | 20.8 | no  | no  | 0.889 | 0.997 |

|           |                                                                         |    |     |      |     |     |       |       |
|-----------|-------------------------------------------------------------------------|----|-----|------|-----|-----|-------|-------|
| Glutamate | Piracetam                                                               | 41 | 6   | 22.4 | no  | no  | 0.709 | 0.997 |
| Glutamate | Putrescine dihydrochloride                                              | 44 | 5   | 21.6 | no  | no  | 0.365 | 0.937 |
| Glutamate | Quinolinic acid                                                         | 33 | 14  | 23.4 | no  | no  | 0.238 | 0.788 |
| Glutamate | Riluzole                                                                | 39 | -22 | 16.4 | no  | no  | 0.001 | 0.011 |
| Glutamate | Ro 25-6981 hydrochloride                                                | 42 | -3  | 20.2 | no  | no  | 0.560 | 0.997 |
| Glutamate | Ro 8-4304                                                               | 43 | -3  | 20.3 | no  | no  | 0.532 | 0.997 |
| Glutamate | S(-)-Willardiine                                                        | 38 | 10  | 23.0 | no  | no  | 0.549 | 0.997 |
| Glutamate | SIB 1757                                                                | 46 | 9   | 23.1 | no  | no  | 0.541 | 0.997 |
| Glutamate | SIB 1893                                                                | 37 | 1   | 21.4 | no  | no  | 0.948 | 0.997 |
| Glutamate | Spermidine trihydrochloride                                             | 48 | -3  | 20.2 | no  | no  | 0.965 | 0.997 |
| Glutamate | Spermine tetrahydrochloride                                             | 47 | -6  | 19.6 | no  | no  | 0.339 | 0.915 |
| Glutamate | trans-(±)-ACPD                                                          | 54 | 1   | 22.0 | no  | no  | 0.926 | 0.997 |
| Glutamate | trans-Azetidine-2,4-dicarboxylic acid                                   | 36 | 4   | 22.8 | no  | no  | 0.956 | 0.997 |
| Glycine   | Phenylbenzene-omega-phosphono-alpha-amino acid                          | 34 | -4  | 19.8 | no  | no  | 0.711 | 0.997 |
| Glycine   | Taurine                                                                 | 42 | 0   | 21.3 | no  | no  | 0.997 | 1.000 |
| Histamine | (+)-Brompheniramine maleate                                             | 33 | -3  | 21.0 | no  | no  | 0.875 | 0.997 |
| Histamine | (+)-Chlorpheniramine maleate                                            | 28 | 8   | 23.5 | no  | no  | 0.555 | 0.997 |
| Histamine | (±)-Brompheniramine maleate                                             | 35 | 4   | 22.4 | no  | no  | 0.612 | 0.997 |
| Histamine | (±)-Chlorpheniramine maleate                                            | 31 | 2   | 22.1 | no  | no  | 0.893 | 0.997 |
| Histamine | 1-Methylhistamine dihydrochloride                                       | 34 | -1  | 20.4 | no  | no  | 0.885 | 0.997 |
| Histamine | 3-(1H-Imidazol-4-yl)propyl di(p-fluorophenyl)methyl ether hydrochloride | 48 | -22 | 16.1 | no  | no  | 0.000 | 0.001 |
| Histamine | 4-Imidazoleacrylic acid                                                 | 42 | -2  | 20.5 | no  | no  | 0.940 | 0.997 |
| Histamine | 4-Imidazolemethanol hydrochloride                                       | 33 | 21  | 24.0 | yes | no  | 0.119 | 0.606 |
| Histamine | Cimetidine                                                              | 40 | 3   | 22.4 | no  | no  | 0.985 | 0.997 |
| Histamine | Clemastine fumarate                                                     | 46 | -19 | 17.5 | no  | no  | 0.002 | 0.035 |
| Histamine | Clemizole hydrochloride                                                 | 41 | 10  | 23.8 | no  | no  | 0.544 | 0.997 |
| Histamine | Diphenhydramine hydrochloride                                           | 38 | 11  | 23.9 | no  | no  | 0.185 | 0.740 |
| Histamine | Doxylamine succinate                                                    | 42 | 4   | 22.3 | no  | no  | 0.703 | 0.997 |
| Histamine | Famotidine                                                              | 41 | 9   | 22.1 | no  | no  | 0.633 | 0.997 |
| Histamine | Fexofenadine hydrochloride                                              | 45 | -2  | 19.8 | no  | no  | 0.936 | 0.997 |
| Histamine | Histamine dihydrochloride                                               | 58 | 2   | 20.3 | no  | no  | 0.509 | 0.996 |
| Histamine | Histamine, R(-)-alpha-methyl-, dihydrochloride                          | 34 | 9   | 21.8 | no  | no  | 0.626 | 0.997 |
| Histamine | Imetit dihydrobromide                                                   | 42 | 0   | 20.7 | no  | no  | 0.644 | 0.997 |
| Histamine | Ketotifen fumarate                                                      | 42 | 1   | 21.0 | no  | no  | 0.553 | 0.997 |
| Histamine | L-Histidine hydrochloride                                               | 40 | -4  | 19.1 | no  | no  | 0.771 | 0.997 |
| Histamine | Loratadine                                                              | 29 | 23  | 25.4 | yes | yes | 0.013 | 0.159 |
| Histamine | Methapyrilene hydrochloride                                             | 34 | 12  | 23.7 | no  | no  | 0.282 | 0.854 |
| Histamine | Oxatomide                                                               | 35 | 31  | 27.6 | yes | yes | 0.000 | 0.001 |
| Histamine | Pheniramine maleate                                                     | 37 | 0   | 20.5 | no  | no  | 0.440 | 0.985 |
| Histamine | Promethazine hydrochloride                                              | 34 | 22  | 25.7 | yes | yes | 0.026 | 0.245 |
| Histamine | Pyrilamine maleate                                                      | 45 | 1   | 21.3 | no  | no  | 0.665 | 0.997 |
| Histamine | Ranitidine hydrochloride                                                | 50 | -5  | 19.8 | no  | no  | 0.511 | 0.996 |
| Histamine | SKF 91488 dihydrochloride                                               | 34 | 1   | 21.4 | no  | no  | 0.425 | 0.973 |
| Histamine | SKF 95282 dimaleate                                                     | 31 | 10  | 22.9 | yes | no  | 0.059 | 0.426 |

|             |                                                          |    |     |      |     |     |       |       |
|-------------|----------------------------------------------------------|----|-----|------|-----|-----|-------|-------|
| Histamine   | Terfenadine                                              | 33 | 43  | 29.9 | yes | no  | 0.000 | 0.000 |
| Histamine   | Thioperamide maleate                                     | 38 | 3   | 21.6 | no  | no  | 0.907 | 0.997 |
| Histamine   | Triprolidine hydrochloride                               | 39 | 2   | 21.7 | no  | no  | 0.684 | 0.997 |
| Hormone     | (R,R)-cis-Diethyl tetrahydro-2,8-chrysenediol            | 26 | 13  | 23.6 | yes | yes | 0.082 | 0.505 |
| Hormone     | 1-(2-Chlorophenyl)-1-(4-chlorophenyl)-2,2-dichloroethane | 27 | 8   | 23.5 | no  | no* | 0.145 | 0.661 |
| Hormone     | 1,3,5-tris(4-hydroxyphenyl)-4-propyl-1H-pyrazole         | 41 | -3  | 19.3 | no  | no  | 0.365 | 0.937 |
| Hormone     | 17alpha-hydroxyprogesterone                              | 42 | 0   | 19.9 | no  | no  | 0.829 | 0.997 |
| Hormone     | 2-methoxyestradiol                                       | 44 | -7  | 19.1 | no  | no  | 0.825 | 0.997 |
| Hormone     | 4-Androsten-4-ol-3,17-dione                              | 32 | 8   | 24.5 | no  | no  | 0.156 | 0.685 |
| Hormone     | AC-93253 iodide                                          | 46 | -72 | 5.9  | no  | no  | 0.000 | 0.000 |
| Hormone     | Acetohexamide                                            | 40 | 0   | 21.9 | no  | no  | 0.730 | 0.997 |
| Hormone     | Androsterone                                             | 36 | 1   | 22.1 | no  | no  | 0.816 | 0.997 |
| Hormone     | Beclomethasone                                           | 37 | -4  | 20.9 | no  | no  | 0.567 | 0.997 |
| Hormone     | beta-Estradiol                                           | 39 | 19  | 24.0 | yes | yes | 0.070 | 0.462 |
| Hormone     | Betamethasone                                            | 40 | 16  | 25.0 | yes | no  | 0.108 | 0.571 |
| Hormone     | Budesonide                                               | 30 | -8  | 19.9 | no  | no  | 0.998 | 1.000 |
| Hormone     | Chlorpropamide                                           | 43 | 6   | 23.0 | no  | no  | 0.472 | 0.995 |
| Hormone     | Cortexolone maleate                                      | 50 | -7  | 19.1 | no  | no  | 0.443 | 0.985 |
| Hormone     | Corticosterone                                           | 27 | -2  | 21.2 | no  | no  | 0.697 | 0.997 |
| Hormone     | Cortisone                                                | 44 | -2  | 21.3 | no  | no  | 0.884 | 0.997 |
| Hormone     | Cortisone 21-acetate                                     | 43 | -1  | 21.4 | no  | no  | 0.883 | 0.997 |
| Hormone     | Cyproterone acetate                                      | 37 | 26  | 27.4 | yes | yes | 0.002 | 0.027 |
| Hormone     | Danazol                                                  | 49 | 6   | 22.1 | yes | yes | 0.061 | 0.432 |
| Hormone     | Estrone                                                  | 47 | -2  | 19.9 | no  | no  | 0.978 | 0.997 |
| Hormone     | Finasteride                                              | 37 | -7  | 21.2 | no  | no  | 0.721 | 0.997 |
| Hormone     | Flutamide                                                | 49 | -19 | 16.5 | no  | no  | 0.079 | 0.496 |
| Hormone     | Fulvestrant                                              | 35 | -10 | 19.6 | no  | no  | 0.141 | 0.661 |
| Hormone     | Hydrocortisone                                           | 45 | 9   | 21.8 | no  | no  | 0.417 | 0.968 |
| Hormone     | Hydrocortisone 21-hemisuccinate sodium                   | 33 | 2   | 20.2 | no  | no  | 0.631 | 0.997 |
| Hormone     | Mifepristone                                             | 46 | -5  | 20.0 | no  | no  | 0.871 | 0.997 |
| Hormone     | Nilutamide                                               | 33 | -7  | 19.8 | no  | no  | 0.861 | 0.997 |
| Hormone     | PQ401                                                    | 55 | -24 | 15.8 | no  | no  | 0.000 | 0.000 |
| Hormone     | Progesterone                                             | 36 | -14 | 18.2 | no  | no  | 0.008 | 0.107 |
| Hormone     | Raloxifene hydrochloride                                 | 42 | 13  | 23.6 | yes | no  | 0.003 | 0.042 |
| Hormone     | Spironolactone                                           | 43 | -3  | 20.4 | no  | no  | 0.758 | 0.997 |
| Hormone     | Tolazamide                                               | 42 | 3   | 21.9 | no  | no  | 0.781 | 0.997 |
| Hormone     | Tolbutamide                                              | 36 | 6   | 22.6 | no  | no  | 0.432 | 0.979 |
| Hormone     | trans-Dehydroandrosterone                                | 40 | 5   | 22.6 | no  | no  | 0.609 | 0.997 |
| Hormone     | Triamcinolone                                            | 43 | 3   | 21.8 | no  | no  | 0.407 | 0.963 |
| Imidazoline | Agmatine sulfate                                         | 40 | -1  | 22.5 | no  | no  | 0.567 | 0.997 |
| Imidazoline | Antozoline hydrochloride                                 | 34 | -1  | 21.7 | no  | no  | 0.534 | 0.997 |
| Imidazoline | Benazoline oxalate                                       | 41 | 3   | 22.3 | no  | no  | 0.505 | 0.996 |
| Imidazoline | BU224 hydrochloride                                      | 40 | -4  | 20.7 | no  | no  | 0.672 | 0.997 |
| Imidazoline | BU99006                                                  | 50 | 9   | 21.6 | no  | no  | 0.285 | 0.857 |



|                                |                                         |    |     |      |     |    |       |       |
|--------------------------------|-----------------------------------------|----|-----|------|-----|----|-------|-------|
| Imidazoline                    | Efaroxan hydrochloride                  | 39 | 6   | 21.4 | no  | no | 0.737 | 0.997 |
| Imidazoline                    | Harmaline                               | 34 | 21  | 24.1 | yes | no | 0.010 | 0.128 |
| Imidazoline                    | Idazoxan hydrochloride                  | 43 | -5  | 19.7 | no  | no | 0.455 | 0.990 |
| Imidazoline                    | Metrazoline oxalate                     | 42 | 0   | 20.6 | no  | no | 0.847 | 0.997 |
| Imidazoline                    | Rilmenidine hemifumarate                | 43 | -2  | 20.5 | no  | no | 0.659 | 0.997 |
| Immune System                  | (E)-5-(2-Bromovinyl)-2'-deoxyuridine    | 42 | -10 | 19.5 | no  | no | 0.061 | 0.432 |
| Immune System                  | 2',3'-didehydro-3'-deoxythymidine       | 36 | 3   | 22.0 | no  | no | 0.744 | 0.997 |
| Immune System                  | 2',3'-dideoxycytidine                   | 45 | 10  | 23.5 | no  | no | 0.223 | 0.787 |
| Immune System                  | 3'-Azido-3'-deoxythymidine              | 31 | 8   | 24.5 | yes | no | 0.112 | 0.582 |
| Immune System                  | 3-deazaadenosine                        | 48 | 3   | 21.5 | no  | no | 0.677 | 0.997 |
| Immune System                  | 6-Aminohexanoic acid                    | 53 | -8  | 20.0 | no  | no | 0.457 | 0.990 |
| Immune System                  | Acyclovir                               | 43 | -9  | 20.8 | no  | no | 0.162 | 0.700 |
| Immune System                  | AFMK                                    | 48 | -7  | 19.0 | no  | no | 0.145 | 0.661 |
| Immune System                  | Amiprilose hydrochloride                | 40 | -6  | 21.4 | no  | no | 0.171 | 0.717 |
| Immune System                  | CV-3988                                 | 30 | 9   | 22.7 | yes | no | 0.042 | 0.341 |
| Immune System                  | Leflunomide                             | 39 | -7  | 19.2 | no  | no | 0.838 | 0.997 |
| Immune System                  | Pirfenidone                             | 42 | 2   | 21.6 | no  | no | 0.716 | 0.997 |
| Intracellular Ca <sup>2+</sup> | Calcimycin                              | 26 | 7   | 23.3 | no  | no | 0.560 | 0.997 |
| Intracellular Ca <sup>2+</sup> | Calmidazolium chloride                  | 41 | -21 | 17.2 | no  | no | 0.015 | 0.174 |
| Intracellular Ca <sup>2+</sup> | Dantrolene sodium                       | 36 | 5   | 22.1 | no  | no | 0.476 | 0.996 |
| Intracellular Ca <sup>2+</sup> | Thapsigargin                            | 27 | 15  | 23.9 | no  | no | 0.551 | 0.997 |
| Intracellular Ca <sup>2+</sup> | Thio-NADP sodium                        | 43 | -2  | 20.8 | no  | no | 0.793 | 0.997 |
| Intracellular Ca <sup>2+</sup> | TMB-8 hydrochloride                     | 36 | -3  | 22.1 | no  | no | 0.890 | 0.997 |
| Intracellular Ca <sup>2+</sup> | W-7 hydrochloride                       | 39 | -15 | 19.4 | no  | no | 0.221 | 0.786 |
| Ion Channels                   | SCH-28080                               | 40 | -16 | 17.5 | no  | no | 0.252 | 0.817 |
| Ion Pump                       | 3',4'-Dichlorobenzamil                  | 31 | -25 | 15.7 | no  | no | 0.228 | 0.787 |
| Ion Pump                       | 5-(N,N-Dimethyl)amiloride hydrochloride | 45 | -11 | 20.2 | no  | no | 0.147 | 0.665 |
| Ion Pump                       | 5-(N,N-hexamethylene)amiloride          | 32 | 3   | 22.5 | no  | no | 0.273 | 0.841 |
| Ion Pump                       | 5-(N-Ethyl-N-isopropyl)amiloride        | 37 | -7  | 21.1 | no  | no | 0.323 | 0.904 |
| Ion Pump                       | 5-(N-Methyl-N-isobutyl)amiloride        | 27 | -4  | 21.9 | no  | no | 0.957 | 0.997 |
| Ion Pump                       | Benzamil hydrochloride                  | 35 | -8  | 19.9 | no  | no | 0.663 | 0.997 |
| Ion Pump                       | Bumetanide                              | 36 | -6  | 20.4 | no  | no | 0.763 | 0.997 |
| Ion Pump                       | Dihydroouabain                          | 44 | -3  | 20.7 | no  | no | 0.896 | 0.997 |
| Ion Pump                       | Flunarizine dihydrochloride             | 39 | -27 | 14.7 | no  | no | 0.001 | 0.012 |
| Ion Pump                       | Furosemide                              | 41 | -2  | 19.9 | no  | no | 0.926 | 0.997 |
| Ion Pump                       | Lansoprazole                            | 44 | 10  | 22.8 | no  | no | 0.184 | 0.737 |
| Ion Pump                       | Ouabain                                 | 40 | -1  | 21.0 | no  | no | 0.433 | 0.980 |
| Ion Pump                       | R(+)-Butylindazone                      | 43 | -1  | 20.7 | no  | no | 0.601 | 0.997 |
| Ion Pump                       | Ruthenium red                           | 36 | -6  | 19.7 | no  | no | 0.584 | 0.997 |
| Ion Pump                       | Sanguinarine chloride                   | 42 | -35 | 13.5 | no  | no | 0.000 | 0.000 |
| K <sup>+</sup> Channel         | 2,3-Butanedione monoxime                | 38 | 8   | 23.7 | no  | no | 0.562 | 0.997 |
| K <sup>+</sup> Channel         | 4-Aminopyridine                         | 39 | 8   | 24.6 | no  | no | 0.299 | 0.871 |
| K <sup>+</sup> Channel         | 5-hydroxydecanoic acid sodium           | 40 | 0   | 19.9 | no  | no | 0.891 | 0.997 |
| K <sup>+</sup> Channel         | Alinidine                               | 39 | 6   | 21.5 | no  | no | 0.906 | 0.997 |
| K <sup>+</sup> Channel         | CBIO                                    | 35 | -77 | 5.0  | no  | no | 0.000 | 0.000 |
| K <sup>+</sup> Channel         | Cibenzoline succinate                   | 31 | 5   | 21.7 | no  | no | 0.333 | 0.908 |

|             |                                                                  |    |     |      |     |     |       |       |
|-------------|------------------------------------------------------------------|----|-----|------|-----|-----|-------|-------|
| K+ Channel  | Clotrimazole                                                     | 42 | -32 | 14.7 | no  | no  | 0.003 | 0.044 |
| K+ Channel  | DCEBIO                                                           | 52 | -4  | 20.1 | no  | no  | 0.423 | 0.972 |
| K+ Channel  | Dequalinium dichloride                                           | 37 | -52 | 10.4 | no  | no  | 0.000 | 0.000 |
| K+ Channel  | Diazoxide                                                        | 41 | 11  | 23.3 | yes | no  | 0.098 | 0.560 |
| K+ Channel  | Disopyramide phosphate                                           | 38 | -13 | 18.2 | no  | no  | 0.651 | 0.997 |
| K+ Channel  | Glibenclamide                                                    | 34 | 4   | 21.1 | no  | no  | 0.793 | 0.997 |
| K+ Channel  | Glipizide                                                        | 33 | 10  | 21.8 | no  | no  | 0.758 | 0.997 |
| K+ Channel  | IMID-4F hydrochloride                                            | 34 | 15  | 22.9 | no  | no  | 0.331 | 0.904 |
| K+ Channel  | Minoxidil                                                        | 43 | 2   | 21.1 | no  | no  | 0.644 | 0.997 |
| K+ Channel  | NS-1619                                                          | 47 | -16 | 17.6 | no  | no  | 0.025 | 0.239 |
| K+ Channel  | Pinacidil                                                        | 48 | -9  | 18.7 | no  | no  | 0.479 | 0.996 |
| K+ Channel  | PNU-37887A                                                       | 45 | -2  | 21.5 | no  | no  | 0.643 | 0.997 |
| K+ Channel  | Propafenone hydrochloride                                        | 44 | -7  | 19.7 | no  | no  | 0.530 | 0.997 |
| K+ Channel  | Psora-4                                                          | 46 | 26  | 27.5 | yes | yes | 0.000 | 0.002 |
| K+ Channel  | Quinidine sulfate                                                | 35 | 18  | 24.2 | yes | yes | 0.053 | 0.394 |
| K+ Channel  | Quinine sulfate                                                  | 38 | -5  | 19.6 | no  | no  | 0.662 | 0.997 |
| K+ Channel  | Rutaecarpine                                                     | 38 | -3  | 20.2 | no  | no  | 0.703 | 0.997 |
| Leukotriene | AA-861                                                           | 44 | -9  | 20.8 | no  | no  | 0.289 | 0.861 |
| Leukotriene | BWB70C                                                           | 40 | -12 | 19.1 | no  | no  | 0.014 | 0.168 |
| Leukotriene | Ebselen                                                          | 37 | 2   | 20.7 | no  | no  | 0.750 | 0.997 |
| Leukotriene | Hydroquinone                                                     | 33 | 14  | 22.8 | no  | no  | 0.279 | 0.848 |
| Leukotriene | MK-886                                                           | 47 | 4   | 21.3 | no  | no  | 0.783 | 0.997 |
| Leukotriene | Nordihydroguaiaretic acid from Larrea divaricata (creosote bush) | 36 | -1  | 21.0 | no  | no  | 0.910 | 0.997 |
| Leukotriene | REV 5901                                                         | 44 | -31 | 14.4 | no  | no  | 0.000 | 0.002 |
| Leukotriene | SR 2640                                                          | 54 | -4  | 20.0 | no  | no  | 0.682 | 0.997 |
| Leukotriene | Tranilast                                                        | 39 | -6  | 20.0 | no  | no  | 0.255 | 0.820 |
| Leukotriene | U-75302                                                          | 35 | 4   | 21.7 | no  | no  | 0.637 | 0.997 |
| Lipid       | (Z)-Guggulesterone                                               | 43 | 9   | 22.7 | no  | no  | 0.166 | 0.705 |
| Lipid       | 7,7-Dimethyl-(5Z,8Z)-eicosadienoic acid                          | 32 | 0   | 20.9 | no  | no  | 0.894 | 0.997 |
| Lipid       | Bromo-enol lactone                                               | 31 | 21  | 26.4 | yes | no  | 0.014 | 0.168 |
| Lipid       | Citicoline sodium                                                | 60 | 10  | 23.7 | no  | no* | 0.146 | 0.662 |
| Lipid       | Clofibrate                                                       | 43 | -5  | 20.7 | no  | no  | 0.526 | 0.997 |
| Lipid       | D-609 potassium                                                  | 35 | -4  | 20.1 | no  | no  | 0.600 | 0.997 |
| Lipid       | ET-18-OCH3                                                       | 42 | -15 | 17.9 | no  | no  | 0.210 | 0.773 |
| Lipid       | L-165,041                                                        | 32 | 21  | 24.1 | no  | no* | 0.254 | 0.820 |
| Lipid       | Ranolazine dihydrochloride                                       | 53 | -7  | 19.3 | no  | no  | 0.328 | 0.904 |
| Lipid       | Sandoz 58-035                                                    | 46 | -10 | 20.5 | no  | no  | 0.412 | 0.966 |
| Lipid       | U-73122                                                          | 48 | -1  | 20.8 | no  | no  | 0.978 | 0.997 |
| Melatonin   | 6-Hydroxymelatonin                                               | 41 | -1  | 19.6 | no  | no  | 0.598 | 0.997 |
| Melatonin   | IKK7                                                             | 28 | 5   | 21.6 | no  | no  | 0.392 | 0.951 |
| Melatonin   | K 185                                                            | 39 | 5   | 21.6 | yes | no  | 0.028 | 0.255 |
| Melatonin   | Melatonin                                                        | 50 | -6  | 19.4 | no  | no  | 0.151 | 0.678 |
| Melatonin   | N-Acetyl-5-hydroxytryptamine                                     | 44 | 1   | 23.0 | no  | no  | 0.998 | 1.000 |
| Melatonin   | N-Acetyltryptamine                                               | 24 | -2  | 21.4 | no  | no  | 0.987 | 0.998 |

|                       |                                                           |    |     |      |     |    |       |       |
|-----------------------|-----------------------------------------------------------|----|-----|------|-----|----|-------|-------|
| Multi-Drug Resistance | 1-(4-Chlorobenzyl)-5-methoxy-2-methylindole-3-acetic acid | 38 | 7   | 23.2 | no  | no | 0.236 | 0.787 |
| Multi-Drug Resistance | 1-(4-Fluorobenzyl)-5-methoxy-2-methylindole-3-acetic acid | 36 | -12 | 17.7 | no  | no | 0.382 | 0.946 |
| Multi-Drug Resistance | 1-Aminobenzotriazole                                      | 50 | -1  | 22.5 | no  | no | 0.472 | 0.995 |
| Multi-Drug Resistance | 1-benzoyl-5-methoxy-2-methylindole-3-acetic acid          | 43 | -11 | 19.4 | no  | no | 0.216 | 0.776 |
| Multi-Drug Resistance | 3-Aminopropionitrile fumarate                             | 30 | -8  | 20.9 | no  | no | 0.227 | 0.787 |
| Multi-Drug Resistance | DL-Buthionine-[S,R]-sulfoximine                           | 62 | -1  | 21.5 | no  | no | 0.800 | 0.997 |
| Multi-Drug Resistance | Ketoconazole                                              | 44 | 2   | 21.2 | no  | no | 0.170 | 0.715 |
| Multi-Drug Resistance | L-Buthionine-sulfoximine                                  | 36 | 8   | 23.4 | no  | no | 0.386 | 0.948 |
| Multi-Drug Resistance | S-(p-Azidophenacyl)glutathione                            | 40 | -7  | 21.2 | no  | no | 0.234 | 0.787 |
| Multi-Drug Resistance | SKF-525A hydrochloride                                    | 27 | 0   | 21.1 | no  | no | 0.943 | 0.997 |
| Multi-Drug Resistance | Sodium Taurocholate                                       | 32 | 0   | 22.7 | no  | no | 0.919 | 0.997 |
| Multi-Drug Resistance | Sulfaphenazole                                            | 45 | -3  | 20.2 | no  | no | 0.495 | 0.996 |
| Na+ Channel           | Amiloride hydrochloride                                   | 45 | -16 | 18.3 | no  | no | 0.043 | 0.351 |
| Na+ Channel           | Disopyramide                                              | 45 | 8   | 22.6 | no  | no | 0.147 | 0.664 |
| Na+ Channel           | Flecainide acetate                                        | 35 | 4   | 21.1 | no  | no | 0.902 | 0.997 |
| Na+ Channel           | Lidocaine hydrochloride                                   | 32 | 7   | 22.3 | no  | no | 0.631 | 0.997 |
| Na+ Channel           | Lidocaine N-ethyl bromide quaternary salt                 | 33 | 2   | 21.0 | no  | no | 0.869 | 0.997 |
| Na+ Channel           | Lidocaine N-methyl hydrochloride                          | 34 | 2   | 21.1 | no  | no | 0.971 | 0.997 |
| Na+ Channel           | Metolazone                                                | 88 | 6   | 21.2 | no  | no | 0.330 | 0.904 |
| Na+ Channel           | Mexiletene hydrochloride                                  | 41 | -5  | 19.5 | no  | no | 0.535 | 0.997 |
| Na+ Channel           | N-Acetylprocainamide hydrochloride                        | 23 | 2   | 23.3 | no  | no | 0.744 | 0.997 |
| Na+ Channel           | N-Bromoacetamide                                          | 41 | -3  | 21.0 | no  | no | 0.972 | 0.997 |
| Na+ Channel           | Phenamil methanesulfonate                                 | 47 | -12 | 18.1 | no  | no | 0.173 | 0.717 |
| Na+ Channel           | Prilocaine hydrochloride                                  | 31 | 8   | 22.2 | no  | no | 0.244 | 0.801 |
| Na+ Channel           | Procainamide hydrochloride                                | 42 | 3   | 21.2 | no  | no | 0.895 | 0.997 |
| Na+ Channel           | Procaine hydrochloride                                    | 32 | 8   | 22.2 | no  | no | 0.497 | 0.996 |
| Na+ Channel           | R(-)-Me5                                                  | 38 | 8   | 22.2 | no  | no | 0.320 | 0.902 |
| Na+ Channel           | Tetracaine hydrochloride                                  | 48 | -2  | 20.5 | no  | no | 0.922 | 0.997 |
| Na+ Channel           | Tocainide hydrochloride                                   | 41 | 9   | 23.4 | no  | no | 0.144 | 0.661 |
| Na+ Channel           | Triamterene                                               | 41 | -2  | 20.8 | no  | no | 0.372 | 0.940 |
| Neurodegeneration     | BF-170 hydrochloride                                      | 48 | -21 | 16.2 | no  | no | 0.000 | 0.007 |
| Neurodegeneration     | Ro 90-7501                                                | 36 | 18  | 24.5 | yes | no | 0.005 | 0.075 |
| Neurotransmission     | (-)-cis-(1S,2R)-U-50488 tartrate                          | 36 | 9   | 22.4 | no  | no | 0.365 | 0.937 |
| Neurotransmission     | (±)-2,3-Dichloro-alpha-methylbenzylamine hydrochloride    | 33 | 3   | 21.6 | no  | no | 0.522 | 0.997 |
| Neurotransmission     | (±)-3-(3,4-dihydroxyphenyl)-2-methyl-DL-alanine           | 30 | 13  | 23.3 | no  | no | 0.202 | 0.758 |
| Neurotransmission     | (±)-p-Chlorophenylalanine                                 | 36 | 12  | 24.3 | no  | no | 0.522 | 0.997 |
| Neurotransmission     | (6R)-5,6,7,8-Tetrahydro-L-biopterin hydrochloride         | 36 | 4   | 22.2 | no  | no | 0.418 | 0.968 |
| Neurotransmission     | 1-Amino-1-cyclohexanecarboxylic acid hydrochloride        | 50 | -3  | 21.1 | no  | no | 0.794 | 0.997 |

|                   |                                                     |    |     |      |     |    |       |       |
|-------------------|-----------------------------------------------------|----|-----|------|-----|----|-------|-------|
| Neurotransmission | 2-Cyclooctyl-2-hydroxyethylamine hydrochloride      | 36 | -2  | 21.0 | no  | no | 0.943 | 0.997 |
| Neurotransmission | 3,5-Dinitrocatechol                                 | 36 | -1  | 20.8 | no  | no | 0.573 | 0.997 |
| Neurotransmission | 3-Iodo-L-tyrosine                                   | 41 | 0   | 20.6 | no  | no | 0.820 | 0.997 |
| Neurotransmission | 6-Methoxy-1,2,3,4-tetrahydro-9H-pyrido[3,4b]indole  | 40 | 6   | 24.3 | no  | no | 0.529 | 0.997 |
| Neurotransmission | alpha-Methyl-DL-tyrosine methyl ester hydrochloride | 44 | 2   | 20.9 | no  | no | 0.800 | 0.997 |
| Neurotransmission | BRL 52537 hydrochloride                             | 40 | 3   | 21.8 | no  | no | 0.303 | 0.880 |
| Neurotransmission | Captopril                                           | 40 | 3   | 22.4 | no  | no | 0.939 | 0.997 |
| Neurotransmission | Carisoprodol                                        | 28 | 11  | 24.2 | no  | no | 0.447 | 0.985 |
| Neurotransmission | Chlormezanone                                       | 32 | -5  | 20.4 | no  | no | 0.401 | 0.957 |
| Neurotransmission | Clorgyline hydrochloride                            | 32 | -2  | 20.1 | no  | no | 0.485 | 0.996 |
| Neurotransmission | Debrisoquin sulfate                                 | 35 | -4  | 20.6 | no  | no | 0.798 | 0.997 |
| Neurotransmission | DL-alpha-Methyl-p-tyrosine                          | 45 | -14 | 19.6 | no  | no | 0.135 | 0.648 |
| Neurotransmission | DL-p-Chlorophenylalanine methyl ester hydrochloride | 38 | 1   | 22.1 | no  | no | 0.814 | 0.997 |
| Neurotransmission | DL-Thiorphan                                        | 35 | 8   | 22.9 | no  | no | 0.329 | 0.904 |
| Neurotransmission | Hydralazine hydrochloride                           | 49 | 15  | 22.9 | no  | no | 0.288 | 0.861 |
| Neurotransmission | Hydroxylamine hydrochloride                         | 40 | 9   | 21.7 | no  | no | 0.380 | 0.946 |
| Neurotransmission | Icilin                                              | 38 | -5  | 20.0 | no  | no | 0.581 | 0.997 |
| Neurotransmission | lofetamine hydrochloride                            | 44 | 10  | 22.8 | no  | no | 0.363 | 0.937 |
| Neurotransmission | Iproniazid phosphate                                | 39 | -4  | 19.9 | no  | no | 0.603 | 0.997 |
| Neurotransmission | L-162,313                                           | 37 | 13  | 23.3 | yes | no | 0.021 | 0.212 |
| Neurotransmission | L-368,899                                           | 47 | -1  | 20.5 | no  | no | 0.792 | 0.997 |
| Neurotransmission | L-alpha-Methyl-p-tyrosine                           | 49 | -1  | 21.0 | no  | no | 0.230 | 0.787 |
| Neurotransmission | Lithium Chloride                                    | 32 | 5   | 21.0 | no  | no | 0.766 | 0.997 |
| Neurotransmission | NBI 27914                                           | 35 | 23  | 24.9 | yes | no | 0.048 | 0.374 |
| Neurotransmission | Nialamide                                           | 47 | 7   | 22.6 | no  | no | 0.411 | 0.966 |
| Neurotransmission | N-Oleoyldopamine                                    | 49 | -3  | 20.3 | no  | no | 0.900 | 0.997 |
| Neurotransmission | N-Succinyl-L-proline                                | 44 | 0   | 20.9 | no  | no | 0.859 | 0.997 |
| Neurotransmission | Org 24598 lithium salt                              | 45 | -3  | 22.0 | no  | no | 0.932 | 0.997 |
| Neurotransmission | Pargyline hydrochloride                             | 42 | -5  | 19.6 | no  | no | 0.360 | 0.937 |
| Neurotransmission | Pentylentetrazole                                   | 56 | -6  | 19.8 | no  | no | 0.245 | 0.801 |
| Neurotransmission | p-Fluoro-L-phenylalanine                            | 40 | 0   | 20.3 | no  | no | 0.906 | 0.997 |
| Neurotransmission | Phenelzine sulfate                                  | 28 | 7   | 22.1 | no  | no | 0.492 | 0.996 |
| Neurotransmission | Quinacrine dihydrochloride                          | 43 | -8  | 18.9 | no  | no | 0.993 | 1.000 |
| Neurotransmission | R(-)-Deprenyl hydrochloride                         | 38 | 3   | 21.8 | no  | no | 0.326 | 0.904 |
| Neurotransmission | R(-)-Desmethyldeprenyl hydrochloride                | 38 | 9   | 22.9 | no  | no | 0.216 | 0.776 |
| Neurotransmission | Ro 16-6491 hydrochloride                            | 28 | -2  | 20.4 | no  | no | 0.709 | 0.997 |
| Neurotransmission | Ro 41-0960                                          | 45 | 3   | 21.5 | no  | no | 0.237 | 0.787 |
| Neurotransmission | Ro 41-1049 hydrochloride                            | 39 | -8  | 19.3 | no  | no | 0.386 | 0.948 |
| Neurotransmission | S-(+)-PD 123177 trifluoroacetate salt hydrate       | 30 | 2   | 22.0 | no  | no | 0.994 | 1.000 |
| Neurotransmission | SB 218795                                           | 35 | -3  | 19.4 | no  | no | 0.688 | 0.997 |
| Neurotransmission | Semicarbazide hydrochloride                         | 34 | 3   | 21.6 | no  | no | 0.942 | 0.997 |
| Neurotransmission | Tranylcypromine hydrochloride                       | 50 | -2  | 20.1 | no  | no | 0.779 | 0.997 |
| Nitric Oxide      | (±)-AMT hydrochloride                               | 46 | 1   | 22.0 | no  | no | 0.717 | 0.997 |

|              |                                                                  |    |     |      |     |     |       |       |
|--------------|------------------------------------------------------------------|----|-----|------|-----|-----|-------|-------|
| Nitric Oxide | 1,3-PBIT dihydrobromide                                          | 33 | 5   | 21.5 | no  | no  | 0.398 | 0.955 |
| Nitric Oxide | 1,4-PBIT dihydrobromide                                          | 33 | -9  | 18.7 | no  | no  | 0.753 | 0.997 |
| Nitric Oxide | 1-[2-(Trifluoromethyl)phenyl]imidazole                           | 47 | 2   | 21.7 | no  | no  | 0.750 | 0.997 |
| Nitric Oxide | 1400W dihydrochloride                                            | 38 | 5   | 21.9 | no  | no  | 0.945 | 0.997 |
| Nitric Oxide | 2-(2-Aminoethyl)isothiourea dihydrobromide                       | 38 | -6  | 21.4 | no  | no  | 0.609 | 0.997 |
| Nitric Oxide | 3-Bromo-7-nitroindazole                                          | 35 | -5  | 20.6 | no  | no  | 0.617 | 0.997 |
| Nitric Oxide | 3-Morpholinosydnimine hydrochloride                              | 50 | 3   | 21.9 | no  | no  | 0.580 | 0.997 |
| Nitric Oxide | 4-Phenyl-3-furoxanarbonitrile                                    | 34 | 24  | 26.3 | yes | yes | 0.005 | 0.068 |
| Nitric Oxide | 7-Nitroindazole                                                  | 32 | -1  | 21.0 | no  | no  | 0.787 | 0.997 |
| Nitric Oxide | alpha-Guanidinoglutaric acid                                     | 40 | 2   | 20.7 | no  | no  | 0.930 | 0.997 |
| Nitric Oxide | Aminoguanidine hemisulfate                                       | 36 | 4   | 23.7 | no  | no  | 0.711 | 0.997 |
| Nitric Oxide | Aminoguanidine hydrochloride                                     | 35 | 2   | 22.3 | no  | no  | 0.708 | 0.997 |
| Nitric Oxide | Ammonium pyrrolidinedithiocarbamate                              | 50 | -19 | 16.6 | no  | no  | 0.001 | 0.020 |
| Nitric Oxide | Chlorzoxazone                                                    | 42 | -10 | 19.5 | no  | no  | 0.068 | 0.462 |
| Nitric Oxide | Diphenyleneiodonium chloride                                     | 47 | -46 | 11.5 | no  | no  | 0.000 | 0.000 |
| Nitric Oxide | L-Arginine                                                       | 55 | 1   | 22.9 | no  | no  | 0.308 | 0.885 |
| Nitric Oxide | L-Canavanine sulfate                                             | 33 | 6   | 23.1 | no  | no  | 0.510 | 0.996 |
| Nitric Oxide | L-N6-(1-Iminoethyl)lysine hydrochloride                          | 33 | 7   | 22.2 | no  | no  | 0.588 | 0.997 |
| Nitric Oxide | Molsidomine                                                      | 43 | 1   | 20.9 | no  | no  | 0.542 | 0.997 |
| Nitric Oxide | N <sup>6</sup> G,N <sup>6</sup> G-Dimethylarginine hydrochloride | 33 | 7   | 23.0 | no  | no  | 0.219 | 0.785 |
| Nitric Oxide | NADPH tetrasodium                                                | 52 | -5  | 20.1 | no  | no  | 0.965 | 0.997 |
| Nitric Oxide | NG-Hydroxy-L-arginine acetate                                    | 37 | 18  | 23.5 | no  | no  | 0.193 | 0.754 |
| Nitric Oxide | NG-Monomethyl-L-arginine acetate                                 | 38 | 1   | 20.7 | no  | no  | 0.536 | 0.997 |
| Nitric Oxide | NG-Nitro-L-arginine                                              | 36 | -4  | 20.3 | no  | no  | 0.732 | 0.997 |
| Nitric Oxide | NG-Nitro-L-arginine methyl ester hydrochloride                   | 38 | -2  | 20.7 | no  | no  | 0.417 | 0.968 |
| Nitric Oxide | Sepiapterin                                                      | 44 | -1  | 21.0 | no  | no  | 0.730 | 0.997 |
| Nitric Oxide | S-Ethylisothiourea hydrobromide                                  | 41 | -13 | 17.5 | no  | no  | 0.126 | 0.624 |
| Nitric Oxide | S-Methylisothiourea hemisulfate                                  | 48 | -10 | 18.4 | no  | no  | 0.030 | 0.269 |
| Nitric Oxide | S-Methyl-L-thiocitrulline acetate                                | 53 | -4  | 19.8 | no  | no  | 0.583 | 0.997 |
| Nitric Oxide | S-Nitrosoglutathione                                             | 31 | -6  | 19.9 | no  | no  | 0.504 | 0.996 |
| Nitric Oxide | S-Nitroso-N-acetylpenicillamine                                  | 35 | 8   | 22.9 | no  | no  | 0.449 | 0.987 |
| Nitric Oxide | Sodium nitroprusside dihydrate                                   | 37 | -13 | 18.2 | no  | no  | 0.014 | 0.169 |
| Nitric Oxide | Thiocitrulline                                                   | 42 | 1   | 21.1 | no  | no  | 0.585 | 0.997 |
| Nootropic    | Centrophenoxine hydrochloride                                    | 31 | 10  | 24.0 | no  | no  | 0.331 | 0.904 |
| Nootropic    | DM 235                                                           | 38 | 3   | 22.1 | no  | no  | 0.631 | 0.997 |
| Nootropic    | Oxiracetam                                                       | 40 | 2   | 21.6 | no  | no  | 0.764 | 0.997 |
| Opioid       | (-)-3-Methoxynaltrexone hydrochloride                            | 41 | -10 | 19.0 | no  | no  | 0.103 | 0.560 |
| Opioid       | (-)-trans-(1S,2S)-U-50488 hydrochloride                          | 40 | 1   | 21.2 | no  | no  | 0.660 | 0.997 |
| Opioid       | (+)-Cyclazocine                                                  | 58 | -5  | 20.4 | no  | no  | 0.838 | 0.997 |
| Opioid       | (+)-N-Allylnormetazocine hydrochloride                           | 37 | 0   | 21.8 | no  | no  | 0.550 | 0.997 |
| Opioid       | (±) trans-U-50488 methanesulfonate                               | 35 | 2   | 21.4 | no  | no  | 0.709 | 0.997 |
| Opioid       | (±)-N-Allylnormetazocine hydrochloride                           | 44 | -3  | 21.3 | no  | no  | 0.552 | 0.997 |
| Opioid       | AC 915 oxalate                                                   | 45 | 6   | 24.1 | no  | no  | 0.227 | 0.787 |
| Opioid       | Carbetapentane citrate                                           | 40 | -4  | 20.9 | no  | no  | 0.665 | 0.997 |
| Opioid       | GR-89696 fumarate                                                | 56 | -4  | 19.1 | no  | no  | 0.577 | 0.997 |
| Opioid       | Guanidinylnaltrindole di-trifluoroacetate                        | 55 | -7  | 18.8 | no  | no  | 0.594 | 0.997 |

|                 |                                                                        |    |     |      |     |     |       |       |
|-----------------|------------------------------------------------------------------------|----|-----|------|-----|-----|-------|-------|
| Opioid          | ICI 204,448 hydrochloride                                              | 35 | -4  | 19.8 | no  | no  | 0.628 | 0.997 |
| Opioid          | L-687,384 hydrochloride                                                | 43 | -10 | 18.6 | no  | no  | 0.193 | 0.754 |
| Opioid          | Levallorphan tartrate                                                  | 30 | 7   | 22.0 | no  | no  | 0.490 | 0.996 |
| Opioid          | Loperamide hydrochloride                                               | 33 | 8   | 22.3 | no  | no  | 0.312 | 0.894 |
| Opioid          | Nalbuphine hydrochloride                                               | 35 | 0   | 21.2 | no  | no  | 0.951 | 0.997 |
| Opioid          | Naloxonazine dihydrochloride                                           | 36 | -12 | 18.5 | no  | no  | 0.024 | 0.235 |
| Opioid          | Naloxone benzoylhydrazone                                              | 42 | 8   | 22.8 | no  | no  | 0.177 | 0.725 |
| Opioid          | Naloxone hydrochloride                                                 | 29 | 4   | 22.1 | no  | no  | 0.935 | 0.997 |
| Opioid          | Naltrexone hydrochloride                                               | 53 | -6  | 19.9 | no  | no  | 0.453 | 0.990 |
| Opioid          | Naltriben methanesulfonate                                             | 51 | -2  | 20.8 | no  | no  | 0.445 | 0.985 |
| Opioid          | Naltrindole hydrochloride                                              | 34 | -4  | 20.4 | no  | no  | 0.535 | 0.997 |
| Opioid          | nor-Binaltorphimine dihydrochloride                                    | 32 | 3   | 21.8 | no  | no  | 0.775 | 0.997 |
| Opioid          | Noscapine hydrchloride                                                 | 51 | -13 | 18.3 | no  | no  | 0.430 | 0.977 |
| Opioid          | PRE-084                                                                | 33 | 3   | 21.7 | no  | no  | 0.615 | 0.997 |
| Opioid          | SNC80                                                                  | 42 | 2   | 21.2 | no  | no  | 0.394 | 0.951 |
| Opioid          | U-62066                                                                | 42 | 2   | 21.2 | no  | no  | 0.841 | 0.997 |
| Opioid          | U-69593                                                                | 40 | -13 | 18.2 | no  | no  | 0.179 | 0.726 |
| P2 Receptor     | 2-Chloroadenosine triphosphate tetrasodium                             | 45 | 3   | 22.0 | no  | no  | 0.353 | 0.930 |
| P2 Receptor     | 2-Methylthioadenosine diphosphate trisodium                            | 42 | 4   | 21.9 | no  | no  | 0.493 | 0.996 |
| P2 Receptor     | 2-Methylthioadenosine triphosphate tetrasodium                         | 36 | 1   | 22.2 | no  | no  | 0.675 | 0.997 |
| P2 Receptor     | alpha,beta-Methylene adenosine 5'-triphosphate dilitium                | 44 | 4   | 21.3 | no  | no  | 0.513 | 0.996 |
| P2 Receptor     | ARL 67156 trisodium salt                                               | 32 | 8   | 23.5 | no  | no  | 0.744 | 0.997 |
| P2 Receptor     | Azathioprine                                                           | 38 | -1  | 22.5 | no  | no  | 0.984 | 0.997 |
| P2 Receptor     | MRS 2159                                                               | 40 | 6   | 21.8 | no  | no  | 0.566 | 0.997 |
| P2 Receptor     | MRS 2179                                                               | 53 | -7  | 19.2 | no  | no  | 0.168 | 0.710 |
| P2 Receptor     | NF 023                                                                 | 46 | -7  | 19.8 | no  | no  | 0.668 | 0.997 |
| P2 Receptor     | PPADS                                                                  | 42 | -1  | 20.3 | no  | no  | 0.624 | 0.997 |
| P2 Receptor     | PPNDS tetrasodium                                                      | 34 | 6   | 22.3 | no  | no  | 0.306 | 0.885 |
| P2 Receptor     | Reactive Blue 2                                                        | 51 | 1   | 21.1 | no  | no  | 0.961 | 0.997 |
| P2 Receptor     | Suramin hexasodium                                                     | 31 | -1  | 21.0 | no  | no  | 0.804 | 0.997 |
| P2 Receptor     | Uridine 5'-diphosphate sodium                                          | 40 | -6  | 19.5 | no  | no  | 0.154 | 0.681 |
| Phosphorylation | (-)-Tetramisole hydrochloride                                          | 45 | 21  | 25.1 | yes | no  | 0.000 | 0.006 |
| Phosphorylation | 1-(5-Isoquinolinylsulfonyl)-2-methylpiperazine dihydrochloride         | 37 | 2   | 21.2 | no  | no  | 0.948 | 0.997 |
| Phosphorylation | 1-(5-Isoquinolinylsulfonyl)-3-methylpiperazine dihydrochloride         | 44 | 3   | 21.2 | no  | no  | 0.510 | 0.996 |
| Phosphorylation | 1,4-Dideoxy-1,4-imino-D-arabinitol                                     | 39 | 2   | 21.8 | no  | no  | 0.565 | 0.997 |
| Phosphorylation | 2,6-Diamino-4-pyrimidinone                                             | 39 | -11 | 18.7 | no  | no  | 0.355 | 0.933 |
| Phosphorylation | 7-Cyclopentyl-5-(4-phenoxy)phenyl-7H-pyrrolo[2,3-d]pyrimidin-4-ylamine | 25 | 14  | 23.8 | yes | yes | 0.044 | 0.351 |
| Phosphorylation | A3 hydrochloride                                                       | 41 | -2  | 20.2 | no  | no  | 0.408 | 0.964 |
| Phosphorylation | Adenosine 3',5'-cyclic monophosphate                                   | 54 | -10 | 19.7 | no  | no  | 0.258 | 0.824 |
| Phosphorylation | Aurothioglucose                                                        | 41 | 0   | 20.7 | no  | no  | 0.561 | 0.997 |
| Phosphorylation | BIO                                                                    | 41 | -43 | 11.8 | no  | no  | 0.000 | 0.000 |
| Phosphorylation | Cantharidic Acid                                                       | 28 | -29 | 15.4 | no  | no  | 0.000 | 0.001 |
| Phosphorylation | Cantharidin                                                            | 46 | -40 | 13.1 | no  | no  | 0.000 | 0.000 |

|                 |                                                      |    |     |      |     |     |       |       |
|-----------------|------------------------------------------------------|----|-----|------|-----|-----|-------|-------|
| Phosphorylation | Ceramide                                             | 37 | -1  | 21.4 | no  | no  | 0.956 | 0.997 |
| Phosphorylation | CGP 57380                                            | 31 | -7  | 19.4 | no  | no  | 0.846 | 0.997 |
| Phosphorylation | CGP-74514A hydrochloride                             | 34 | -31 | 15.0 | no  | no  | 0.000 | 0.000 |
| Phosphorylation | Chelerythrine chloride                               | 32 | -19 | 17.6 | no  | no  | 0.068 | 0.462 |
| Phosphorylation | CK2 Inhibitor 2                                      | 40 | -1  | 21.2 | no  | no  | 0.547 | 0.997 |
| Phosphorylation | Cyclosporin A                                        | 41 | 14  | 24.9 | yes | yes | 0.015 | 0.174 |
| Phosphorylation | DAPH                                                 | 47 | 14  | 24.8 | yes | yes | 0.024 | 0.235 |
| Phosphorylation | Daphnetin                                            | 39 | 6   | 22.6 | no  | no  | 0.660 | 0.997 |
| Phosphorylation | Dephostatin                                          | 38 | 9   | 22.7 | no  | no  | 0.440 | 0.985 |
| Phosphorylation | Diacylglycerol Kinase Inhibitor II                   | 47 | 16  | 24.8 | yes | no  | 0.028 | 0.255 |
| Phosphorylation | DL-erythro-Dihydrosphingosine                        | 29 | 10  | 23.1 | no  | no  | 0.628 | 0.997 |
| Phosphorylation | DL-Stearoylcarnitine chloride                        | 45 | -13 | 18.2 | no  | no  | 0.030 | 0.269 |
| Phosphorylation | Emodin                                               | 36 | -7  | 18.8 | no  | no  | 0.037 | 0.307 |
| Phosphorylation | Endothall                                            | 31 | 10  | 22.2 | no  | no  | 0.359 | 0.937 |
| Phosphorylation | Furegrelate sodium                                   | 39 | -2  | 19.9 | no  | no  | 0.938 | 0.997 |
| Phosphorylation | Genistein                                            | 43 | 6   | 21.5 | no  | no  | 0.595 | 0.997 |
| Phosphorylation | GW2974                                               | 43 | 7   | 21.6 | no  | no  | 0.296 | 0.871 |
| Phosphorylation | GW5074                                               | 34 | 2   | 20.6 | no  | no  | 0.782 | 0.997 |
| Phosphorylation | H-8 dihydrochloride                                  | 38 | 7   | 22.7 | no  | no  | 0.234 | 0.787 |
| Phosphorylation | H-89                                                 | 43 | -28 | 15.7 | no  | no  | 0.001 | 0.017 |
| Phosphorylation | H-9 dihydrochloride                                  | 46 | -4  | 21.1 | no  | no  | 0.707 | 0.997 |
| Phosphorylation | HA-100                                               | 40 | -10 | 18.0 | no  | no  | 0.401 | 0.957 |
| Phosphorylation | HA-1004 hydrochloride                                | 38 | -4  | 19.2 | no  | no  | 0.558 | 0.997 |
| Phosphorylation | Hispidin                                             | 26 | 18  | 23.4 | no  | no  | 0.458 | 0.990 |
| Phosphorylation | IC 261                                               | 29 | 11  | 22.8 | yes | no  | 0.059 | 0.426 |
| Phosphorylation | Indirubin-3'-oxime                                   | 31 | 16  | 23.1 | no  | no  | 0.552 | 0.997 |
| Phosphorylation | I-OMe-Tyrphostin AG 538                              | 45 | 10  | 23.0 | yes | no  | 0.027 | 0.252 |
| Phosphorylation | Kenpauillone                                         | 45 | 21  | 25.0 | yes | yes | 0.001 | 0.016 |
| Phosphorylation | LFM-A13                                              | 35 | 23  | 25.4 | yes | yes | 0.002 | 0.033 |
| Phosphorylation | LY-294,002 hydrochloride                             | 42 | 0   | 20.7 | no  | no  | 0.484 | 0.996 |
| Phosphorylation | Me-3,4-dephostatin                                   | 30 | -1  | 20.9 | no  | no  | 0.998 | 1.000 |
| Phosphorylation | ML-7                                                 | 42 | -9  | 18.9 | no  | no  | 0.825 | 0.997 |
| Phosphorylation | ML-9                                                 | 44 | -7  | 20.2 | no  | no  | 0.921 | 0.997 |
| Phosphorylation | Myricetin                                            | 36 | 8   | 22.2 | yes | no  | 0.069 | 0.462 |
| Phosphorylation | Norcantharidin                                       | 37 | -5  | 20.0 | no  | no  | 0.967 | 0.997 |
| Phosphorylation | NSC 95397                                            | 38 | -11 | 17.7 | no  | no  | 0.073 | 0.471 |
| Phosphorylation | Oleic Acid                                           | 43 | -3  | 20.5 | no  | no  | 0.587 | 0.997 |
| Phosphorylation | Olomoucine                                           | 40 | 5   | 22.1 | no  | no  | 0.798 | 0.997 |
| Phosphorylation | Palmitoyl-DL-Carnitine chloride                      | 32 | 13  | 23.8 | yes | no  | 0.015 | 0.174 |
| Phosphorylation | PD 169316                                            | 36 | -21 | 16.6 | no  | no  | 0.067 | 0.455 |
| Phosphorylation | PD 98,059                                            | 36 | -1  | 20.4 | no  | no  | 0.521 | 0.997 |
| Phosphorylation | Phorbol 12-myristate 13-acetate                      | 28 | -49 | 10.4 | no  | no  | 0.000 | 0.000 |
| Phosphorylation | Piceatannol                                          | 44 | -12 | 18.6 | no  | no  | 0.181 | 0.733 |
| Phosphorylation | rac-2-Ethoxy-3-hexadecanamido-1-propylphosphocholine | 30 | -8  | 18.5 | no  | no  | 0.144 | 0.661 |

|                 |                                                      |    |     |      |     |     |       |       |
|-----------------|------------------------------------------------------|----|-----|------|-----|-----|-------|-------|
| Phosphorylation | rac-2-Ethoxy-3-octadecanamido-1-propylphosphocholine | 37 | -2  | 19.9 | no  | no  | 0.624 | 0.997 |
| Phosphorylation | Roscovitine                                          | 38 | -1  | 20.7 | no  | no  | 0.368 | 0.937 |
| Phosphorylation | Rottlerin                                            | 40 | 6   | 22.1 | no  | no  | 0.209 | 0.772 |
| Phosphorylation | S(-)-p-Bromotetramisole oxalate                      | 42 | 12  | 25.5 | no  | no  | 0.326 | 0.904 |
| Phosphorylation | SB 202190                                            | 37 | -3  | 21.0 | no  | no  | 0.765 | 0.997 |
| Phosphorylation | SB 216763                                            | 38 | 7   | 22.5 | no  | no  | 0.719 | 0.997 |
| Phosphorylation | SB 415286                                            | 42 | -2  | 19.8 | no  | no  | 0.980 | 0.997 |
| Phosphorylation | SD-169                                               | 46 | -4  | 20.5 | no  | no  | 0.810 | 0.997 |
| Phosphorylation | SP600125                                             | 47 | -22 | 16.4 | no  | no  | 0.004 | 0.059 |
| Phosphorylation | Sphingosine                                          | 39 | 5   | 22.0 | no  | no  | 0.519 | 0.997 |
| Phosphorylation | SU 4312                                              | 29 | 16  | 24.6 | yes | yes | 0.000 | 0.005 |
| Phosphorylation | SU 5416                                              | 38 | -13 | 18.2 | no  | no  | 0.055 | 0.407 |
| Phosphorylation | SU 6656                                              | 39 | -22 | 16.0 | no  | no  | 0.090 | 0.530 |
| Phosphorylation | Tamoxifen citrate                                    | 31 | -21 | 16.5 | no  | no  | 0.229 | 0.787 |
| Phosphorylation | TBB                                                  | 34 | -9  | 19.2 | no  | no  | 0.102 | 0.560 |
| Phosphorylation | Tetramisole hydrochloride                            | 46 | 9   | 23.2 | no  | no  | 0.816 | 0.997 |
| Phosphorylation | Tyrphostin 1                                         | 41 | 5   | 22.3 | no  | no  | 0.606 | 0.997 |
| Phosphorylation | Tyrphostin 23                                        | 60 | -6  | 19.9 | no  | no  | 0.444 | 0.985 |
| Phosphorylation | Tyrphostin 25                                        | 30 | 13  | 24.0 | yes | no  | 0.105 | 0.563 |
| Phosphorylation | Tyrphostin 47                                        | 34 | 10  | 23.1 | no  | no* | 0.141 | 0.661 |
| Phosphorylation | Tyrphostin 51                                        | 46 | 11  | 23.1 | no  | no* | 0.161 | 0.697 |
| Phosphorylation | Tyrphostin A9                                        | 21 | -95 | 1.1  | no  | no  | 0.199 | 0.755 |
| Phosphorylation | Tyrphostin AG 112                                    | 37 | 3   | 21.8 | no  | no  | 0.426 | 0.973 |
| Phosphorylation | Tyrphostin AG 126                                    | 49 | -10 | 18.7 | no  | no  | 0.215 | 0.776 |
| Phosphorylation | Tyrphostin AG 1478                                   | 36 | 3   | 21.8 | yes | yes | 0.064 | 0.445 |
| Phosphorylation | Tyrphostin AG 34                                     | 38 | 8   | 22.8 | no  | no* | 0.141 | 0.661 |
| Phosphorylation | Tyrphostin AG 490                                    | 43 | 6   | 22.4 | no  | no  | 0.262 | 0.827 |
| Phosphorylation | Tyrphostin AG 494                                    | 39 | 5   | 22.3 | no  | no  | 0.335 | 0.909 |
| Phosphorylation | Tyrphostin AG 527                                    | 36 | 11  | 23.5 | no  | no  | 0.214 | 0.776 |
| Phosphorylation | Tyrphostin AG 528                                    | 40 | 5   | 22.4 | yes | no  | 0.041 | 0.334 |
| Phosphorylation | Tyrphostin AG 537                                    | 21 | -8  | 19.5 | no  | no  | 0.149 | 0.671 |
| Phosphorylation | Tyrphostin AG 538                                    | 30 | 9   | 22.8 | no  | no  | 0.318 | 0.899 |
| Phosphorylation | Tyrphostin AG 555                                    | 50 | -7  | 19.7 | no  | no  | 0.470 | 0.995 |
| Phosphorylation | Tyrphostin AG 698                                    | 46 | -7  | 19.7 | no  | no  | 0.636 | 0.997 |
| Phosphorylation | Tyrphostin AG 808                                    | 28 | -2  | 20.9 | no  | no  | 0.985 | 0.997 |
| Phosphorylation | Tyrphostin AG 835                                    | 46 | 1   | 21.5 | no  | no  | 0.539 | 0.997 |
| Phosphorylation | Tyrphostin AG 879                                    | 43 | -92 | 1.7  | no  | no  | 0.000 | 0.000 |
| Phosphorylation | U0126                                                | 41 | -21 | 16.6 | no  | no  | 0.012 | 0.156 |
| Phosphorylation | Wortmannin                                           | 40 | 17  | 24.4 | yes | no  | 0.008 | 0.107 |
| Phosphorylation | Y-27632 dihydrochloride                              | 34 | 8   | 23.2 | no  | no  | 0.278 | 0.845 |
| Phosphorylation | ZM 39923 hydrochloride                               | 34 | 14  | 24.2 | yes | no  | 0.006 | 0.090 |
| Prostaglandin   | (-)-Naproxen sodium                                  | 40 | -11 | 18.4 | no  | no  | 0.102 | 0.560 |
| Prostaglandin   | (±)-Ibuprofen                                        | 45 | 1   | 20.8 | no  | no  | 0.924 | 0.997 |
| Prostaglandin   | 1-Methylimidazole                                    | 46 | -2  | 20.8 | no  | no  | 0.903 | 0.997 |
| Prostaglandin   | Acetylsalicylic acid                                 | 39 | 2   | 23.3 | no  | no  | 0.864 | 0.997 |



|               |                                               |    |     |      |     |     |       |       |
|---------------|-----------------------------------------------|----|-----|------|-----|-----|-------|-------|
| Prostaglandin | Diclofenac sodium                             | 27 | 2   | 21.4 | no  | no  | 0.484 | 0.996 |
| Prostaglandin | Etodolac                                      | 44 | -9  | 19.1 | no  | no  | 0.102 | 0.560 |
| Prostaglandin | Indomethacin                                  | 45 | -3  | 20.0 | no  | no  | 0.833 | 0.997 |
| Prostaglandin | Ketoprofen                                    | 61 | -1  | 20.6 | no  | no  | 0.774 | 0.997 |
| Prostaglandin | Ketorolac tris salt                           | 43 | 0   | 20.8 | no  | no  | 0.783 | 0.997 |
| Prostaglandin | Ioxoprofen                                    | 47 | -5  | 19.6 | no  | no  | 0.833 | 0.997 |
| Prostaglandin | Meclofenamic acid sodium                      | 48 | -10 | 18.6 | no  | no  | 0.055 | 0.407 |
| Prostaglandin | Meloxicam sodium                              | 43 | 2   | 20.9 | no  | no  | 0.715 | 0.997 |
| Prostaglandin | Niflumic acid                                 | 47 | -13 | 18.5 | no  | no  | 0.003 | 0.042 |
| Prostaglandin | Nimesulide                                    | 27 | 16  | 24.5 | yes | no  | 0.018 | 0.188 |
| Prostaglandin | Oxaprozin                                     | 49 | -5  | 20.0 | no  | no  | 0.223 | 0.787 |
| Prostaglandin | Phenylbutazone                                | 40 | -11 | 18.3 | no  | no  | 0.063 | 0.438 |
| Prostaglandin | Piroxicam                                     | 26 | -2  | 20.6 | no  | no  | 0.898 | 0.997 |
| Prostaglandin | Resveratrol                                   | 42 | -18 | 17.2 | no  | no  | 0.090 | 0.530 |
| Prostaglandin | S(+)-Ibuprofen                                | 42 | -1  | 20.4 | no  | no  | 0.777 | 0.997 |
| Prostaglandin | SC 19220                                      | 48 | -3  | 20.2 | no  | no  | 0.446 | 0.985 |
| Prostaglandin | SC-560                                        | 33 | -14 | 17.9 | no  | no  | 0.001 | 0.013 |
| Prostaglandin | Sulindac                                      | 39 | -6  | 19.7 | no  | no  | 0.365 | 0.937 |
| Prostaglandin | Sulindac sulfone                              | 36 | -5  | 19.9 | no  | no  | 0.544 | 0.997 |
| Serotonin     | (R)-(-)-DOI hydrochloride                     | 38 | -3  | 20.4 | no  | no  | 0.997 | 1.000 |
| Serotonin     | (±)-8-Hydroxy-DPAT hydrobromide               | 39 | -3  | 19.4 | no  | no  | 0.943 | 0.997 |
| Serotonin     | (±)-DOI hydrochloride                         | 33 | 5   | 22.0 | no  | no  | 0.587 | 0.997 |
| Serotonin     | 1-(1-Naphthyl)piperazine hydrochloride        | 30 | -11 | 19.0 | no  | no  | 0.927 | 0.997 |
| Serotonin     | 1-(2-Methoxyphenyl)piperazine hydrochloride   | 40 | 8   | 23.0 | no  | no  | 0.200 | 0.755 |
| Serotonin     | 1-(3-Chlorophenyl)piperazine dihydrochloride  | 33 | -18 | 17.8 | no  | no  | 0.087 | 0.530 |
| Serotonin     | 1-(m-Chlorophenyl)-biguanide hydrochloride    | 27 | 10  | 23.6 | no  | no  | 0.727 | 0.997 |
| Serotonin     | 1-Phenylbiguanide                             | 34 | 6   | 21.9 | no  | no  | 0.237 | 0.787 |
| Serotonin     | 2-Methyl-5-hydroxytryptamine maleate          | 50 | -7  | 19.7 | no  | no  | 0.895 | 0.997 |
| Serotonin     | 3-Tropanyl-3,5-dichlorobenzoate               | 56 | -12 | 18.3 | no  | no  | 0.740 | 0.997 |
| Serotonin     | 3-Tropanyl-indole-3-carboxylate hydrochloride | 38 | 0   | 20.8 | no  | no  | 0.785 | 0.997 |
| Serotonin     | 3-Tropanylindole-3-carboxylate methiodide     | 27 | 1   | 21.1 | no  | no  | 0.539 | 0.997 |
| Serotonin     | 5-Carboxamidotryptamine maleate               | 48 | 10  | 23.6 | no  | no  | 0.130 | 0.631 |
| Serotonin     | 5-Hydroxyindolacetic acid                     | 41 | 9   | 21.6 | no  | no  | 0.350 | 0.925 |
| Serotonin     | 5-Hydroxy-L-tryptophan                        | 31 | 10  | 21.9 | no  | no  | 0.496 | 0.996 |
| Serotonin     | 5-Methoxy DMT oxalate                         | 35 | -1  | 20.3 | no  | no  | 0.862 | 0.997 |
| Serotonin     | Alaproclate hydrochloride                     | 40 | -3  | 21.1 | no  | no  | 0.785 | 0.997 |
| Serotonin     | alpha-Methyl-5-hydroxytryptamine maleate      | 41 | -1  | 21.1 | no  | no  | 0.990 | 0.999 |
| Serotonin     | Amperozide hydrochloride                      | 38 | 25  | 28.5 | yes | yes | 0.008 | 0.106 |
| Serotonin     | BMY 7378 dihydrochloride                      | 39 | 2   | 22.2 | no  | no  | 0.423 | 0.972 |
| Serotonin     | BRL 15572                                     | 37 | 16  | 25.2 | yes | yes | 0.000 | 0.010 |
| Serotonin     | BRL 54443 maleate                             | 44 | 6   | 23.0 | no  | no  | 0.387 | 0.948 |
| Serotonin     | Buspirone hydrochloride                       | 44 | -2  | 21.3 | no  | no  | 0.689 | 0.997 |
| Serotonin     | BW 723C86                                     | 39 | -2  | 21.2 | no  | no  | 0.961 | 0.997 |
| Serotonin     | CGS-12066A maleate                            | 39 | -13 | 18.7 | no  | no  | 0.093 | 0.545 |
| Serotonin     | Citalopram hydrobromide                       | 41 | 10  | 23.9 | no  | no  | 0.659 | 0.997 |
| Serotonin     | Clomipramine hydrochloride                    | 37 | 21  | 26.4 | no  | no* | 0.152 | 0.679 |

|           |                                                 |    |     |      |     |          |       |       |
|-----------|-------------------------------------------------|----|-----|------|-----|----------|-------|-------|
| Serotonin | Cyclobenzaprine hydrochloride                   | 38 | 41  | 30.7 | yes | no       | 0.000 | 0.000 |
| Serotonin | Cyproheptadine hydrochloride                    | 34 | 42  | 30.8 | yes | previous | 0.000 | 0.000 |
| Serotonin | Dihydroergotamine methanesulfonate              | 41 | 42  | 30.4 | yes | yes      | 0.000 | 0.000 |
| Serotonin | Fluoxetine hydrochloride                        | 50 | -13 | 17.5 | no  | no       | 0.080 | 0.502 |
| Serotonin | Fluvoxamine maleate                             | 39 | -2  | 19.9 | no  | no       | 0.651 | 0.997 |
| Serotonin | GR 113808                                       | 44 | -7  | 20.1 | no  | no       | 0.504 | 0.996 |
| Serotonin | GR 125487 sulfamate salt                        | 45 | 3   | 20.6 | no  | no       | 0.746 | 0.997 |
| Serotonin | GR 127935 hydrochloride                         | 45 | -4  | 19.8 | no  | no       | 0.629 | 0.997 |
| Serotonin | GR 4661                                         | 39 | -5  | 21.6 | no  | no       | 0.687 | 0.997 |
| Serotonin | Imipramine hydrochloride                        | 31 | -10 | 18.6 | no  | no       | 0.297 | 0.871 |
| Serotonin | Ketanserin tartrate                             | 39 | 18  | 25.0 | yes | yes      | 0.049 | 0.374 |
| Serotonin | L-Tryptophan                                    | 45 | -2  | 20.8 | no  | no       | 0.727 | 0.997 |
| Serotonin | LY-278,584 maleate                              | 43 | 3   | 21.2 | no  | yes      | 0.653 | 0.997 |
| Serotonin | LY-310,762 hydrochloride                        | 38 | 31  | 27.2 | yes | no       | 0.001 | 0.011 |
| Serotonin | LY-367,265                                      | 25 | 40  | 29.1 | yes | yes      | 0.000 | 0.000 |
| Serotonin | Metergoline                                     | 34 | 23  | 25.4 | yes | yes      | 0.005 | 0.068 |
| Serotonin | Methiothepin mesylate                           | 34 | 33  | 28.2 | yes | previous | 0.000 | 0.000 |
| Serotonin | Methysergide maleate                            | 29 | -1  | 21.0 | no  | no       | 0.746 | 0.997 |
| Serotonin | Mianserin hydrochloride                         | 35 | 36  | 27.9 | yes | previous | 0.000 | 0.006 |
| Serotonin | ML 10302                                        | 42 | -5  | 19.6 | no  | no       | 0.827 | 0.997 |
| Serotonin | N,N-Dipropyl-5-carboxamidotryptamine maleate    | 40 | 8   | 22.7 | no  | no       | 0.202 | 0.758 |
| Serotonin | NAN-190 hydrobromide                            | 41 | -6  | 20.0 | no  | no       | 0.412 | 0.966 |
| Serotonin | N-omega-Methyl-5-hydroxytryptamine oxalate salt | 40 | 6   | 21.8 | no  | no       | 0.926 | 0.997 |
| Serotonin | O-Methylserotonin hydrochloride                 | 29 | 8   | 22.2 | no  | no       | 0.585 | 0.997 |
| Serotonin | PAPP                                            | 42 | 23  | 26.1 | yes | no       | 0.001 | 0.024 |
| Serotonin | Paroxetine hydrochloride hemihydrate            | 51 | 6   | 23.1 | yes | no       | 0.099 | 0.560 |
| Serotonin | Parthenolide                                    | 44 | -11 | 18.8 | no  | no*      | 0.450 | 0.988 |
| Serotonin | Pirenperone                                     | 40 | 8   | 22.2 | yes | no       | 0.019 | 0.203 |
| Serotonin | p-MPPF dihydrochloride                          | 36 | 8   | 22.9 | no  | no       | 0.205 | 0.760 |
| Serotonin | Quipazine dimaleate                             | 39 | 3   | 21.1 | no  | no       | 0.440 | 0.985 |
| Serotonin | Quipazine, 6-nitro-, maleate                    | 32 | -21 | 16.2 | no  | no       | 0.000 | 0.001 |
| Serotonin | Quipazine, N-methyl-, dimaleate                 | 45 | -18 | 17.0 | no  | no       | 0.001 | 0.021 |
| Serotonin | R(-)-Fluoxetine hydrochloride                   | 27 | 7   | 21.7 | no  | no       | 0.555 | 0.997 |
| Serotonin | R(+)-8-Hydroxy-DPAT hydrobromide                | 43 | 5   | 20.9 | no  | no       | 0.734 | 0.997 |
| Serotonin | R(+)-UH-301 hydrochloride                       | 53 | 7   | 22.3 | no  | no       | 0.245 | 0.801 |
| Serotonin | Reserpine                                       | 26 | 6   | 24.2 | no  | no       | 0.189 | 0.743 |
| Serotonin | Ritanserin                                      | 45 | -16 | 17.5 | no  | no       | 0.000 | 0.004 |
| Serotonin | Ro 04-6790 dihydrochloride                      | 30 | 1   | 21.1 | no  | no       | 0.763 | 0.997 |
| Serotonin | S(-)-UH-301 hydrochloride                       | 30 | -1  | 20.6 | no  | no       | 0.652 | 0.997 |
| Serotonin | S(+)-Fluoxetine hydrochloride                   | 43 | -8  | 18.6 | no  | no       | 0.265 | 0.831 |
| Serotonin | S15535                                          | 36 | -4  | 20.3 | no  | no       | 0.256 | 0.820 |
| Serotonin | SB 200646 hydrochloride                         | 30 | -6  | 20.5 | no  | no       | 0.531 | 0.997 |
| Serotonin | SB 203186                                       | 34 | 6   | 22.8 | no  | no       | 0.551 | 0.997 |
| Serotonin | SB 204070 hydrochloride                         | 45 | 7   | 22.4 | yes | no       | 0.022 | 0.218 |
| Serotonin | SB 204741                                       | 32 | -4  | 20.9 | no  | no       | 0.887 | 0.997 |

|                |                                                                          |    |     |      |     |    |       |       |
|----------------|--------------------------------------------------------------------------|----|-----|------|-----|----|-------|-------|
| Serotonin      | SB 206553 hydrochloride                                                  | 47 | -1  | 21.1 | no  | no | 0.420 | 0.968 |
| Serotonin      | SB 224289 hydrochloride                                                  | 49 | 4   | 22.1 | yes | no | 0.101 | 0.560 |
| Serotonin      | SB 228357                                                                | 25 | 15  | 22.9 | no  | no | 0.276 | 0.843 |
| Serotonin      | SB 269970 hydrochloride                                                  | 38 | 7   | 22.3 | yes | no | 0.127 | 0.625 |
| Serotonin      | SB-215505                                                                | 50 | -6  | 19.9 | no  | no | 0.913 | 0.997 |
| Serotonin      | SDZ-205,557 hydrochloride                                                | 45 | -4  | 20.4 | no  | no | 0.516 | 0.997 |
| Serotonin      | Serotonin hydrochloride                                                  | 41 | 16  | 23.1 | yes | no | 0.033 | 0.283 |
| Serotonin      | Sertraline hydrochloride                                                 | 38 | -32 | 14.5 | no  | no | 0.003 | 0.044 |
| Serotonin      | Spiroaxatine                                                             | 33 | 14  | 24.3 | yes | no | 0.026 | 0.246 |
| Serotonin      | SR 57227A                                                                | 42 | -1  | 20.6 | no  | no | 0.770 | 0.997 |
| Serotonin      | Trazodone hydrochloride                                                  | 42 | -5  | 20.1 | no  | no | 0.367 | 0.937 |
| Serotonin      | Trimipramine maleate                                                     | 31 | 11  | 23.5 | no  | no | 0.226 | 0.787 |
| Serotonin      | Tryptamine hydrochloride                                                 | 46 | -5  | 21.8 | no  | no | 0.267 | 0.833 |
| Serotonin      | VER-3323 hemifumarate salt                                               | 37 | -24 | 15.7 | no  | no | 0.035 | 0.299 |
| Serotonin      | WAY-100635 maleate                                                       | 41 | 11  | 23.2 | no  | no | 0.177 | 0.725 |
| Serotonin      | Zimelidine dihydrochloride                                               | 46 | -1  | 20.6 | no  | no | 0.945 | 0.997 |
| Sigma receptor | Opipramol dihydrochloride                                                | 36 | -2  | 21.4 | no  | no | 0.771 | 0.997 |
| Somatostatin   | Cysteamine hydrochloride                                                 | 34 | -4  | 19.7 | no  | no | 0.452 | 0.989 |
| Sphingolipid   | (±)-threo-1-Phenyl-2-decanoylamino-3-morpholino-1-propanol hydrochloride | 48 | -7  | 19.0 | no  | no | 0.485 | 0.996 |
| Sphingolipid   | DL-Cycloserine                                                           | 36 | -3  | 21.2 | no  | no | 0.687 | 0.997 |
| Sphingolipid   | L-Cycloserine                                                            | 44 | -1  | 21.5 | no  | no | 0.873 | 0.997 |
| Sphingolipid   | N-Oleylethanolamine                                                      | 39 | 1   | 21.4 | no  | no | 0.790 | 0.997 |
| Tachykinin     | L-703,606 oxalate                                                        | 31 | -46 | 11.2 | no  | no | 0.000 | 0.000 |
| Tachykinin     | L-732,138                                                                | 30 | 5   | 23.9 | no  | no | 0.706 | 0.997 |
| Tachykinin     | L-733,060 hydrochloride                                                  | 35 | -39 | 12.6 | no  | no | 0.000 | 0.007 |
| Tachykinin     | SB 222200                                                                | 41 | 14  | 24.8 | yes | no | 0.119 | 0.606 |
| Tachykinin     | WIN 62,577                                                               | 39 | 7   | 22.3 | yes | no | 0.101 | 0.560 |
| Thromboxane    | Picotamide                                                               | 31 | 6   | 21.8 | no  | no | 0.677 | 0.997 |
| Transcription  | 6(5H)-Phenanthridinone                                                   | 46 | -7  | 19.1 | no  | no | 0.617 | 0.997 |
| Transcription  | 6-Nitroso-1,2-benzopyrone                                                | 47 | -4  | 20.3 | no  | no | 0.860 | 0.997 |
| Transcription  | AC-55649                                                                 | 49 | -5  | 19.9 | no  | no | 0.049 | 0.377 |
| Transcription  | Ciprofibrate                                                             | 40 | -12 | 19.1 | no  | no | 0.121 | 0.610 |
| Transcription  | D-ribofuranosylbenzimidazole                                             | 43 | -8  | 19.8 | no  | no | 0.110 | 0.581 |
| Transcription  | Fenofibrate                                                              | 37 | -6  | 18.9 | no  | no | 0.601 | 0.997 |
| Transcription  | GW1929                                                                   | 33 | 1   | 20.5 | no  | no | 0.515 | 0.997 |
| Transcription  | GW7647                                                                   | 33 | -13 | 17.7 | no  | no | 0.145 | 0.661 |
| Transcription  | GW9662                                                                   | 42 | -13 | 17.9 | no  | no | 0.018 | 0.187 |
| Transcription  | TCPOBOP                                                                  | 44 | -20 | 17.0 | no  | no | 0.010 | 0.128 |
| Transcription  | Tetradecylthioacetic acid                                                | 48 | -10 | 19.1 | no  | no | 0.001 | 0.024 |
| Transcription  | TTNPB                                                                    | 37 | 11  | 23.6 | yes | no | 0.106 | 0.570 |
| Vanilloid      | Capsazepine                                                              | 35 | 0   | 21.4 | no  | no | 0.989 | 0.999 |
| Vanilloid      | Dihydrocapsaicin                                                         | 35 | -1  | 20.4 | no  | no | 0.784 | 0.997 |
| Vanilloid      | N-Vanillylnonanamide                                                     | 29 | 3   | 21.5 | no  | no | 0.736 | 0.997 |
| Vanilloid      | SB-366791                                                                | 49 | -12 | 18.3 | no  | no | 0.067 | 0.455 |
| Vanilloid      | Vanillic acid diethylamide                                               | 18 | 21  | 25.4 | yes | no | 0.111 | 0.581 |

**Supplementary Table 2.**  
**Summary of *C. elegans* lifespan experiments with 57 hit compounds**

\*mean lifespan in days/ *P* value/ % change in lifespan/ no. of animals

\*\*mean % change in lifespan/ S.D./ no. of experiments/ no. of animals

| Class                        | Compound name                | Con<br>c.<br>[ $\mu$ M] | Screen*                  | Dose-response*        | Expt. #1*                | Expt. #2*                | Expt. #3*                | Expt. #4* | Summary**            |
|------------------------------|------------------------------|-------------------------|--------------------------|-----------------------|--------------------------|--------------------------|--------------------------|-----------|----------------------|
| Antibiotic                   | Demeclocycline hydrochloride | 3                       |                          | 18.0/0.75/ +1%/45     |                          |                          |                          |           | +1%/ --/1/45         |
|                              |                              | 13                      |                          | 19.5/0.21/ +10%/49    |                          |                          |                          |           | +10%/ --/1/49        |
|                              |                              | 33                      | 24.4/0.03/<br>+16%/43    | 22.0/0.06/ +14%/61    | 30.7/2.7E-05/<br>+19%/59 |                          |                          |           | <u>+16%/3/3/163</u>  |
|                              |                              | 88                      |                          | 25.4/4.0E-05/ +28%/57 |                          |                          |                          |           | +28%/ --/1/57        |
|                              |                              | 176                     |                          | 19.7/0.01/ -6%/65     |                          |                          |                          |           | -6%/ --/1/65         |
| Antibiotic                   | Doxycycline hydrochloride    | 0.2                     |                          | 27.0/0.77/ -1%/46     |                          |                          |                          |           | -1%/ --/1/46         |
|                              |                              | 0.6                     |                          | 28.6/0.79/4%/34       |                          |                          |                          |           | +4%/ --/1/34         |
|                              |                              | 3                       |                          | 30.4/0.47/ +11%/32    |                          |                          |                          |           | +11%/ --/1/32        |
|                              |                              | 6                       |                          | 31.2/1.2E-03/ +14%/39 |                          |                          |                          |           | +14%/ --/1/39        |
|                              |                              | 17                      |                          | 32.1/8.0E-03/ +17%/39 |                          |                          |                          |           | +17%/ --/1/39        |
|                              |                              | 33                      | 27.0/2.1E-03/<br>+29%/38 | 28.0/0.04/ +2%/38     | 32.9/5.1E-13/<br>+32%/43 | 28.7/2.6E-05/<br>+11%/52 |                          |           | <u>+18%/14/4/171</u> |
| Antibiotic                   | Minocycline hydrochloride    | 3                       |                          | 17.1/0.26/ -4%/56     |                          |                          |                          |           | -4%/ --/1/56         |
|                              |                              | 13                      |                          | 21.4/4.8E-03/ +21%/54 |                          |                          |                          |           | +21%/ --/1/54        |
|                              |                              | 33                      | 24.4/8.0E-03/<br>+15%/27 | 23.7/1.1E-03/ +22%/58 |                          |                          |                          |           | +18%/5/2/85          |
|                              |                              | 88                      |                          | 29.5/7.5E-12/ +49%/63 | 27.7/0.01/<br>+14%/71    | 26.9/3.0E-06/<br>+24%/70 | 33.8/1.3E-12/<br>+31%/61 |           | <u>+29%/15/4/265</u> |
|                              |                              | 176                     |                          | 26.0/0.01/ +24%/55    |                          |                          |                          |           | +24%/ --/1/55        |
| Biochemistry                 | 3,4-Dichloroisocoumarin      | 3                       |                          | 17.9/0.95/ +0%/61     |                          |                          |                          |           | 0%/ --/1/61          |
|                              |                              | 13                      |                          | 18.1/0.95/ +3%/60     |                          |                          |                          |           | +3%/ --/1/60         |
|                              |                              | 33                      | 26.9/0.012/<br>+28%/29   | 24.5/1.4E-03/ +26%/39 |                          |                          |                          |           | +27%/10/1.4/68       |
|                              |                              | 56                      |                          |                       | 24.7/7.1E-04/<br>+14%/74 |                          |                          |           | +14%/ --/1/74        |
|                              |                              | 88                      |                          | 28.1/2.1E-07/ +41%/48 | 20.3/0.49/<br>-17%/85    | 29.8/4.3E-03/<br>+16%/33 |                          |           | <u>+13%/29/3/166</u> |
|                              |                              | 176                     |                          | 10.8/3.9E-08/ -48%/36 |                          |                          |                          |           | -48%/ --/1/36        |
| Biogenic Amine/ Adrenoceptor | Amoxapine                    | 3                       |                          | 21.8/0.2/ +21%/41     |                          |                          |                          |           | +21%/ --/1/41        |
|                              |                              | 13                      |                          | 26.5/4.7E-08/ +50%/41 |                          |                          |                          |           | +50%/ --/1/41        |
|                              |                              | 33                      | 30.4/3.4E-08/<br>+39%/40 | 27.3/1.4E-06/ +41%/44 |                          |                          |                          |           | +40%/1/2/84          |
|                              |                              | 88                      |                          | 32.8/1.5E-15/ +65%/43 | 28.5/4.4E-05/<br>+17%/83 | 28.4/1.9E-07/<br>+31%/65 | 30.6/4.4E-05/<br>+19%/68 |           | <u>+33%/22/4/259</u> |
|                              |                              | 176                     |                          | 25.9/0.025/ +24%/47   |                          |                          |                          |           | +24%/ --/1/47        |
| Biogenic Amine/ Adrenoceptor | Doxazosin mesylate           | 3                       |                          | 15.9/0.3/ -11%/42     |                          |                          |                          |           | -11%/ --/1/42        |
|                              |                              | 13                      |                          | 20.1/2.6E-03/ +14%/57 |                          |                          |                          |           | +14%/ --/1/57        |

|                                    |                                |     |                          |                       |                          |                          |                          |                      |                      |
|------------------------------------|--------------------------------|-----|--------------------------|-----------------------|--------------------------|--------------------------|--------------------------|----------------------|----------------------|
|                                    |                                | 33  | 23.2/1.8E-03/<br>+11%/38 | 22.1/3.4E-04/ +14%/46 | 30.9/3.9E-08/<br>+20%/52 |                          |                          |                      | <u>+15%/5/3/136</u>  |
|                                    |                                | 88  |                          | 19.1/0.09/ -4%/54     |                          |                          |                          |                      | -4%/ --/1/54         |
|                                    |                                | 176 |                          | 13.2/2.2E-11/ -37%/59 |                          |                          |                          |                      | -37%/ --/1/59        |
| Biogenic<br>Amine/<br>Adrenoceptor | Guanabenz acetate              | 3   |                          | 19.9/0.04/ +11%/48    |                          |                          |                          |                      | +11%/ --/1/48        |
|                                    |                                | 13  |                          | 19.5/0.027/ +10%/76   |                          |                          |                          |                      | +10%/ --/1/76        |
|                                    |                                | 33  | 23.6/5.7E-03/<br>+19%/43 | 18.1/0.5/ -7%/50      |                          |                          |                          |                      | +6%/18/2/93          |
|                                    |                                | 88  |                          | 23.3/1.9E-04/ +17%/61 | 29.3/5.5E-12/<br>+21%/90 | 23.7/0.011/<br>+10%/69   | 26.1/0.8/<br>+1%/53      |                      | <u>+12%/9/4/273</u>  |
|                                    |                                | 176 |                          | 23.5/8.5E-04/ +12%/60 |                          |                          |                          |                      | +12%/ --/1/60        |
| Biogenic<br>Amine/<br>Adrenoceptor | Guanfacine<br>hydrochloride    | 3   |                          | 18.4/0.47/ +2%/67     |                          |                          |                          |                      | +2%/ --/1/67         |
|                                    |                                | 13  |                          | 21.8/2.1E-04/ +23%/55 | 25.1/0.39/ +3%/66        | 26.7/1.8E-04/<br>+23%/55 | 28.2/0.03/<br>+10%/51    |                      | <u>+15%/10/4/227</u> |
|                                    |                                | 33  | 25.7/1.4E-03/<br>+27%/43 | 23.3/4.0E-03/ +20%/47 |                          |                          |                          |                      | +24%/ --/5/2/90      |
|                                    |                                | 88  |                          | 24.3/9.9E-05/ +22%/61 |                          |                          |                          |                      | +22%/ --/1/61        |
|                                    |                                | 176 |                          | 23.8/1.8E-03/ +13%/44 |                          |                          |                          |                      | +13%/ --/1/44        |
| Biogenic<br>Amine/<br>Adrenoceptor | Naftopidil<br>dihydrochloride  | 3   |                          | 20.0/0.06/ +12%/63    |                          |                          |                          |                      | +12%/ --/1/63        |
|                                    |                                | 13  |                          | 19.4/0.02/ +10%/68    |                          |                          |                          |                      | +10%/ --/1/68        |
|                                    |                                | 33  | 24/1.0E-03/<br>+14%/30   | 23.7/1.1E-04/ +22%/43 | 27.6/0.11/ +7%/62        |                          |                          |                      | <u>+14%/8/3/135</u>  |
|                                    |                                | 88  |                          | 26.1/2.8E-07/ +31%/57 |                          |                          |                          |                      | +31%/ --/1/57        |
|                                    |                                | 176 |                          | 28.8/1.1E-09/ +37%/57 |                          |                          |                          |                      | +37%/ --/1/57        |
| Biogenic<br>Amine/<br>Adrenoceptor | Nortriptyline<br>hydrochloride | 3   |                          | 18.8/0.55/ +5%/60     |                          |                          |                          |                      | +5%/ --/1/60         |
|                                    |                                | 13  |                          | 17.9/0.66/ +1%/62     |                          |                          |                          |                      | +1%/ --/1/62         |
|                                    |                                | 33  | 26.7/5.1E-09/<br>+26%/41 | 22.4/0.026/ +15%/56   |                          |                          |                          |                      | +21%/8/2/97          |
|                                    |                                | 88  |                          | 26.9/3.9E-08/ +35%/71 | 31.1/1.7E-07/<br>+28%/73 | 25.5/0.014/<br>+18%/75   | 26.1/0.98/<br>+1%/49     |                      | <u>+21%/15/4/268</u> |
|                                    |                                | 176 |                          | 26.6/0.048/ +26%/51   |                          |                          |                          |                      | +26%/ --/1/51        |
| Biogenic<br>Amine<br>/Histamine    | Loratadine                     | 3   |                          | +17.7/0.7/ -1%/54     |                          |                          |                          |                      | -1%/ --/1/54         |
|                                    |                                | 13  |                          | 19.7/0.07/ +11%/63    |                          |                          |                          |                      | +11%/ --/1/63        |
|                                    |                                | 33  | 25.4/7.2E-04/<br>+23%/29 | 23.0/3.8E-05/ +18%/57 | 28.8/0.47/<br>+12%/42    |                          |                          |                      | <u>+18%/6/3/128</u>  |
|                                    |                                | 88  |                          | 26.9/5.9E-09/ +35%/58 |                          |                          |                          |                      | +35%/ --/1/58        |
|                                    |                                | 176 |                          | 21.3/0.95/ +2%/46     |                          |                          |                          |                      | +2%/ --/1/46         |
| Biogenic<br>Amine<br>/Histamine    | Oxatomide                      | 3   |                          | 21.4/0.04/ +19%/48    | 25.7/0.07/ -6%/38        |                          |                          |                      | +7%/18/2/86          |
|                                    |                                | 13  |                          | 25.1/1.1E-07/ +42%/55 | 29.8/0.03/ +9%/44        |                          |                          |                      | +26%/23/2/99         |
|                                    |                                | 33  | 27.6/6.9E-09/<br>+31%/35 | 25.1/1.6E-07/ +29%/52 | 30.3/1.4E-03/<br>+11%/44 |                          |                          |                      | +24%/11/3/131        |
|                                    |                                | 88  |                          | 28.9/3.9E-12/ +46%/69 | 31.7/1.6E-05/<br>+16%/49 | 31.7/3.9E-15/<br>+30%/94 | 27.4/8.1E-09/<br>+27%/96 | 27.6/0.25/<br>+7%/58 | <u>+25%/15/5/366</u> |
|                                    |                                | 176 |                          | 32.0/4.8E-12/ +53%/59 | 29.7/0.17/ +8%/50        |                          |                          |                      | +31%/32/2/109        |
| Biogenic<br>Amine<br>/Histamine    | Promethazine<br>hydrochloride  | 3   |                          | 21.2/0.1/ +18%/48     |                          |                          |                          |                      | +18%/ --/1/48        |

|                          |                                      |     |                          |                        |                          |                          |                          |  |  |                      |
|--------------------------|--------------------------------------|-----|--------------------------|------------------------|--------------------------|--------------------------|--------------------------|--|--|----------------------|
|                          |                                      | 13  |                          | 17.1/0.6/ -3%/65       |                          |                          |                          |  |  | -3%/ -/1/65          |
|                          |                                      | 33  | 25.7/2.7E-03/<br>+22%/34 | 24.3/1.7E-04/ +25%/60  |                          |                          |                          |  |  | +24%/2/2/94          |
|                          |                                      | 88  |                          | 27.5/3.4E-06/ +38%/44  |                          |                          |                          |  |  | +38%/ -/1/44         |
|                          |                                      | 176 |                          | 32.0/2.0E-13/ +52%/68  | 31.8/6.9E-10/<br>+31%/79 | 29.4/1.3E-08/<br>+36%/67 | 28.2/0.9/<br>+10%/51     |  |  | <u>+32%/17/4/265</u> |
| Biogenic Amine /Dopamine | (±)-OctoclothePIN maleate            | 3   |                          | 27.6/ 4.3E-13/ +54%/62 |                          |                          |                          |  |  | +54%/ -/1/62         |
|                          |                                      | 13  |                          | 29.9/2.2E-23/ +69%/73  | 32.4/2.1E-03/<br>+31%/52 | 28.8/2.6E-11/<br>+33%/76 | 30.3/3.7E-04/<br>+18%/57 |  |  | <u>+38%/22/4/258</u> |
|                          |                                      | 33  | 28.1/1.1E-12/<br>+33%/39 | 31.1/6.5E-19/ +60%/60  |                          |                          |                          |  |  | +47%/19/2/99         |
|                          |                                      | 88  |                          | 23.9/6.1E-03/ +20%/61  |                          |                          |                          |  |  | +20%/ -/1/61         |
|                          |                                      | 176 |                          | 11.5/1.9E-15/ -45%/53  |                          |                          |                          |  |  | -45%/ -/1/53         |
| Biogenic Amine /Dopamine | BTCP hydrochloride                   | 3   |                          | 17.9/0.83/0%/47        |                          |                          |                          |  |  | 0%/ -/1/47           |
|                          |                                      | 13  |                          | 18.0/0.78/ +2%/53      |                          |                          |                          |  |  | +2%/ -/1/53          |
|                          |                                      | 33  | 26.4/1.4E-07/<br>+22%/51 | 22.8/1.2E-03/ +18%/58  |                          |                          |                          |  |  | +20%/3/2/109         |
|                          |                                      | 88  |                          | 22.1/0.05/ +11%/35     | 29.2/0.06/<br>+18%/47    | 26.7/9.1E-08/<br>+23%/63 | 27.1/0.07/<br>+5%/63     |  |  | <u>+14%/8/4/208</u>  |
|                          |                                      | 176 |                          | 18.3/0.42/ -13%/50     |                          |                          |                          |  |  | -13%/ -/1/50         |
| Biogenic Amine /Dopamine | Chlorprothixene hydrochloride        | 3   |                          | 26.2/7.1E-06/ +46%/44  |                          |                          |                          |  |  | +46%/ -/1/44         |
|                          |                                      | 13  |                          | 28.2/1.7E-12/ +59%/45  | 31.4/8.7E-04/<br>+27%/67 | 30.6/4.3E-13/<br>+42%/66 | 26.5/0.76/<br>+3%/59     |  |  | <u>+33%/24/4/237</u> |
|                          |                                      | 33  | 32.5/3.9E-18/<br>+50%/43 | 28.9/3.9E-11/ +49%/44  |                          |                          |                          |  |  | +50%/1/2/87          |
|                          |                                      | 88  |                          | 26.6/9.3E-06/ +34%/52  |                          |                          |                          |  |  | +34%/ -/1/52         |
|                          |                                      | 176 |                          | 26.5/1.8E-03/ +26%/57  |                          |                          |                          |  |  | +26%/ -/1/57         |
| Biogenic Amine /Dopamine | cis-(Z)-Flupenthixol dihydrochloride | 3   |                          | 21.7/0.46/ +21%/59     |                          |                          |                          |  |  | +21%/ -/1/59         |
|                          |                                      | 13  |                          | 26.7/3.3E-11/ +51%/59  |                          |                          |                          |  |  | +51%/ -/1/59         |
|                          |                                      | 33  | 30.0/1.7E-08/<br>+48%/38 | 30.6/3.4E-17/ +57%/53  | 28.6/0.09/<br>+16%/57    | 28.0/5.9E-09/<br>+30%/67 | 25.3/0.35/<br>-2%/53     |  |  | <u>+30%/24/5/268</u> |
|                          |                                      | 88  |                          | 31.2/6.4E-15/ +57%/57  |                          |                          |                          |  |  | +57%/ -/1/57         |
|                          |                                      | 176 |                          | 19.9/0.14/ -5%/41      |                          |                          |                          |  |  | -5%/ -/1/41          |
| Biogenic Amine /Dopamine | Cortexolone maleate                  | 3   |                          | 19.1/0.14/ +6%/56      |                          |                          |                          |  |  | +6%/ -/1/56          |
|                          |                                      | 13  |                          | 18.9/0.15/ +7%/46      |                          |                          |                          |  |  | +7%/ -/1/46          |
|                          |                                      | 33  | 24.3/3.9E-10/<br>+16%/47 | 22.0/8.8E-04/ +13%/53  | 25.0/0.55/ +5%/74        |                          |                          |  |  | <u>-11%/6/3/174</u>  |
|                          |                                      | 88  |                          | 24.2/2.6E-05/ +22%/50  |                          |                          |                          |  |  | +22%/ -/1/50         |
|                          |                                      | 176 |                          | 24.0/6.2E-04/ +14%/65  |                          |                          |                          |  |  | +14%/ -/1/65         |
| Biogenic Amine /Dopamine | Dihydroergocristine methanesulfonate | 3   |                          | 20.4/0.08/ +14%/53     |                          |                          |                          |  |  | +14%/ -/1/53         |
|                          |                                      | 13  |                          | 22.9/1.3E-03/ +30%/40  |                          |                          |                          |  |  | +30%/ -/1/40         |
|                          |                                      | 33  | 29.4/8.3E-08/<br>+40%/32 | 24.5/1.1E-04/ +26%/46  |                          |                          |                          |  |  | +33%/10/2/78         |
|                          |                                      | 88  |                          | 27.7/3.2E-08/ +39%/53  |                          |                          |                          |  |  | +39%/ -/1/53         |

|                          |                                                                  |     |                       |                       |                       |                       |                       |  |                      |
|--------------------------|------------------------------------------------------------------|-----|-----------------------|-----------------------|-----------------------|-----------------------|-----------------------|--|----------------------|
|                          |                                                                  | 176 |                       | 31.0/1.5E-11/ +48%/67 | 33.1/5.5E-05/ +34%/71 | 30.3/2.0E-12/ +40%/57 | 29.6/3.7E-03/ +15%/53 |  | <u>+34%/14/4/248</u> |
| Biogenic Amine /Dopamine | Loxapine succinate                                               | 3   |                       | 20.2/0.46/ +13%/59    |                       |                       |                       |  | +13%/ --/1/59        |
|                          |                                                                  | 13  |                       | 23.7/1.4E-04/ +34%/50 |                       |                       |                       |  | +34%/ --/1/50        |
|                          |                                                                  | 33  | 25.4/8.0E-06/ +23%/41 | 25.5/8.9E-06/ +31%/58 |                       |                       |                       |  | +27%/6/2/99          |
|                          |                                                                  | 88  |                       | 30.3/5.3E-12/ +53%/47 | 36.1/1.9E-08/ +46%/59 | 33.5/6.1E-21/ +55%/65 | 30.2/6.9E-06/ +17%/80 |  | <u>+43%/18/4/251</u> |
|                          |                                                                  | 176 |                       | 31.7/1.3E-10/ +51%/39 |                       |                       |                       |  | +51%/ --/1/39        |
| Biogenic Amine /Dopamine | Methylergonovine maleate                                         | 3   |                       | 20.7/0.06/ +15%/63    |                       |                       |                       |  | +15%/ --/1/63        |
|                          |                                                                  | 13  |                       | 22.6/1.2E-04/ +28%/59 |                       |                       |                       |  | +28%/ --/1/59        |
|                          |                                                                  | 33  | 26.0/5.9E-04/ +26%/40 | 28.5/1.0E-09/ +47%/48 |                       |                       |                       |  | +37%/15/2/88         |
|                          |                                                                  | 88  |                       | 29.9/1.1E-13/ +51%/70 | 29.8/0.11/ +21%/71    | 27.4/5.2E-06/ +27%/60 | 29.3/0.02/ +14%/61    |  | <u>+28%/16/4/262</u> |
|                          |                                                                  | 176 |                       | 30.1/1.0E-06/ +43%/51 |                       |                       |                       |  | +43%/ --/1/51        |
| Biogenic Amine /Dopamine | N-(2-[4-(4-Chlorophenyl)piperazin-1-yl]ethyl)-3-methoxybenzamide | 3   |                       | 21.1/0.09/ +18%/42    |                       |                       |                       |  | +18%/ --/1/42        |
|                          |                                                                  | 13  |                       | 23.7/8.3E-08/ +34%/57 |                       |                       |                       |  | +34%/ --/1/57        |
|                          |                                                                  | 33  | 28.1/1.7E-06/ +29%/41 | 28.3/3.2E-12/ +46%/44 | 32.7/3.5E-05/ +32%/54 | 32.2/3.2E-18/ +49%/57 | 30.8/2.8E-07/ +20%/61 |  | <u>+35%/12/5/257</u> |
|                          |                                                                  | 88  |                       | 27.0/1.3E-09/ +36%/47 |                       |                       |                       |  | +36%/ --/1/47        |
|                          |                                                                  | 176 |                       | 29.6/5.8E-10/ +41%/50 |                       |                       |                       |  | +41%/ --/1/50        |
| Biogenic Amine /Dopamine | Pergolide methanesulfonate                                       | 3   |                       | 24.9/4.5E-07/ +39%/54 |                       |                       |                       |  | +39%/ --/1/54        |
|                          |                                                                  | 13  |                       | 30.5/1.5E-19/ +72%/50 | 29.8/0.04/ +21%/63    | 30.5/1.8E-11/ +41%/56 | 29.3/1.0E-04/ +14%/83 |  | <u>+37%/26/4/252</u> |
|                          |                                                                  | 33  | 27.2/4.4E-10/ +32%/37 | 31.6/1.1E-19/ +63%/54 |                       |                       |                       |  | +48%/22/2/91         |
|                          |                                                                  | 88  |                       | 30.6/9.9E-14/ +54%/54 |                       |                       |                       |  | +54%/ --/1/54        |
|                          |                                                                  | 176 |                       | 30.2/7.4E-11/ +44%/67 |                       |                       |                       |  | +44%/ --/1/67        |
| Biogenic Amine /Dopamine | Propionylpromazine hydrochloride                                 | 3   |                       | 22.3/0.01/ +24%/44    |                       |                       |                       |  | +24%/ --/1/44        |
|                          |                                                                  | 13  |                       | 23.8/4.5E-06/ +35%/48 |                       |                       |                       |  | +35%/ --/1/48        |
|                          |                                                                  | 33  | 25.6/1.4E-07/ +24%/46 | 26.4/5.9E-08/ +36%/55 | 25.6/0.06/ -1%/64     |                       |                       |  | <u>+20%/19/3/165</u> |
|                          |                                                                  | 88  |                       | 30.4/4.9E-15/ +53%/57 |                       |                       |                       |  | +53%/ --/1/57        |
|                          |                                                                  | 176 |                       | 24.1/0.01/ +15%/44    |                       |                       |                       |  | +15%/ --/1/44        |
| Biogenic Amine /Dopamine | Thioridazine hydrochloride                                       | 3   |                       | 18.8/0.74/ +5%/46     |                       |                       |                       |  | +5%/ --/1/46         |
|                          |                                                                  | 13  |                       | 23.9/8.3E-06/ +35%/51 |                       |                       |                       |  | +35%/ --/1/51        |
|                          |                                                                  | 33  | 28.1/5.1E-15/ +34%/42 | 29/2.5E-13/ +49%/57   | 25.7/0.09/ +9%/92     |                       |                       |  | <u>+31%/20/3/191</u> |
|                          |                                                                  | 88  |                       | 31.2/8.9E-16/ +57%/55 |                       |                       |                       |  | +57%/ --/1/55        |
|                          |                                                                  | 176 |                       | 19.3/0.67/ -8%/59     |                       |                       |                       |  | -8%/ --/1/59         |

|                            |                                    |     |                       |                        |                       |                       |                       |  |                      |
|----------------------------|------------------------------------|-----|-----------------------|------------------------|-----------------------|-----------------------|-----------------------|--|----------------------|
| Biogenic Amines /Serotonin | Amperozide hydrochloride           | 3   |                       | 25.3/5.7E-08/ +41%/53  |                       |                       |                       |  | +41%/-/1/53          |
|                            |                                    | 13  |                       | 30.1/1.3E-16/ +70%/39  | 28.9/3.0E-04/ +19%/73 | 30.8/5.7E-19/ +42%/85 | 30.8/5.6E-09/ +20%/61 |  | <u>+38%/24/4/258</u> |
|                            |                                    | 33  | 28.5/5.2E-04/ +25%/38 | 32.6/4.1E-24/ +68%/63  |                       |                       |                       |  | +47%/30/2/101        |
|                            |                                    | 88  |                       | 32.5/1.6E-22/ +64%/64  |                       |                       |                       |  | +64%/-/1/64          |
|                            |                                    | 176 |                       | 32.3/3.3E-17/ +54%/59  |                       |                       |                       |  | +54%/-/1/59          |
| Biogenic Amines /Serotonin | BRL 15572                          | 3   |                       | 29.6/0.3/ +6%/74       |                       |                       |                       |  | +6%/-/1/74           |
|                            |                                    | 13  |                       | 32.8/9.9E-06/ +17%/58  |                       |                       |                       |  | +17%/-/1/58          |
|                            |                                    | 33  | 25.2/1.9E-06/ +16%/37 | 29.2/0.12/ +5%/75      | 28.5/1.5E-03/ +11%/59 | 26.3/5E-05/ +6%/50    |                       |  | <u>+10%/5/4/221</u>  |
|                            |                                    | 88  |                       | 21.5/3.8E-10/ -23%/80  |                       |                       |                       |  | -23%/-/1/80          |
|                            |                                    | 176 |                       | 18.3/5.5E-30/ -34%/84  |                       |                       |                       |  | -34%/-/1/84          |
| Biogenic Amines /Serotonin | Dihydroergotamine methanesulfonate | 3   |                       | 22.4/6.5E-03/ +25%/35  |                       |                       |                       |  | +25%/-/1/35          |
|                            |                                    | 13  |                       | 23.0/7.1E-05/ +30%/61  |                       |                       |                       |  | +30%/-/1/61          |
|                            |                                    | 33  | 30.4/1.7E-10/ +42%/41 | 22.1/0.08/ +14%/48     |                       |                       |                       |  | +28%/2/2/89          |
|                            |                                    | 88  |                       | 28.7/9.9E-07/ +44%/38  | 31.0/4.8E-08/ +27%/85 | 23.2/0.35/ +7%/77     | 30.4/5.0E-03/ +18%/61 |  | <u>+24%/20/4/261</u> |
|                            |                                    | 176 |                       | 27.4/7.7E-04/ +30%/54  |                       |                       |                       |  | +30%/-/1/54          |
| Biogenic Amines /Serotonin | Ketanserin tartrate                | 3   |                       | 20.1/0.36/ +12%/49     |                       |                       |                       |  | +12%/-/1/49          |
|                            |                                    | 13  |                       | 19.5/0.49/ +10%/49     |                       |                       |                       |  | +10%/-/1/49          |
|                            |                                    | 33  | 25/6.3E-03/ +18%/39   | 21.0/0.19/ +8%/55      |                       |                       |                       |  | +13%/7/2/94          |
|                            |                                    | 88  |                       | 24.2/3.4E-03/ +22%/55  |                       |                       |                       |  | +22%/-/1/55          |
|                            |                                    | 176 |                       | 25.9/1.3E-03/ +23%/59  | 27.9/0.02/ +15%/66    | 25.3/0.04/ +17%/69    | 25.2/0.47/ -2%/61     |  | <u>+13%/11/4/255</u> |
| Biogenic Amines /Serotonin | LY-165,163                         | 3   |                       | 19.8/0.5/ +10%/48      |                       |                       |                       |  | +10%/1/48            |
|                            |                                    | 13  |                       | 25.2/1.1E-08/ +42%/59  |                       |                       |                       |  | +42%/-/1/59          |
|                            |                                    | 33  | 26.1/8.8E-06/ +23%/42 | 31.3/2.1E-18/ +61%/55  | 31.9/3.4E-13/ +31%/77 | 29.8/2.2E-10/ +38%/70 | 29.1/0.03/ +13%/65    |  | <u>+33%/18/5/309</u> |
|                            |                                    | 88  |                       | +30.1/2.6E-11/ +52%/49 |                       |                       |                       |  | +52%/-/1/49          |
|                            |                                    | 176 |                       | 32.3/6.9E-14/ +54%/63  |                       |                       |                       |  | +54%/-/1/63          |
| Biogenic Amines /Serotonin | LY-367,265                         | 3   |                       | 23.4/1.3E-06/ +34%/106 |                       |                       |                       |  | +34%/-/1/106         |
|                            |                                    | 13  |                       | 28.8/1.5E-20/ +64%/103 |                       |                       |                       |  | +64%/-/1/103         |
|                            |                                    | 33  | 29.1/5.3E-11/ +40%/25 | 28.2/5.7E-1/ +61%/89   | 31.7/1.6E-09/ +28%/44 | 27.4/0.05/ +7%/51     |                       |  | <u>+34%/23/4/209</u> |
|                            |                                    | 88  |                       | 29.1/2.0E-18/ +66%/88  |                       |                       |                       |  | +66%/-/1/88          |
|                            |                                    | 176 |                       | 28/1.9E-13/ +60%/67    |                       |                       |                       |  | +60%/-/1/67          |
| Biogenic Amines /Serotonin | Metergoline                        | 3   |                       | 22.6/0.017/ +26%/37    |                       |                       |                       |  | +26%/-/1/37          |
|                            |                                    | 13  |                       | 22.8/2.2/ +29%/51      |                       |                       |                       |  | +29%/-/1/51          |
|                            |                                    | 33  | 25.4/1.2E-04/ +23%/34 | 25.6/5.2E-05/ +32%/43  | 28.9/1.4E-03/ +13%/65 |                       |                       |  | <u>+23%/10/3/142</u> |



|                                   |                                               |     |                       |                        |                        |                        |                       |                       |                      |
|-----------------------------------|-----------------------------------------------|-----|-----------------------|------------------------|------------------------|------------------------|-----------------------|-----------------------|----------------------|
|                                   |                                               | 88  |                       | 23.8/1.1E-05/ +20%/63  |                        |                        |                       |                       | +20%/ --/1/63        |
|                                   |                                               | 176 |                       | 13.1/1.9E-05/ -38%/49  |                        |                        |                       |                       | -38%/ --/1/49        |
| <b>Biogenic Amines /Serotonin</b> | <b>Mianserin hydrochloride</b>                | 3   |                       | 23.8/3.0E-03/ +31%/66  |                        |                        |                       |                       | +31%/ --/1/66        |
|                                   |                                               | 13  |                       | 29.0/1.1E-15/ +59%/89  |                        |                        |                       |                       | +59%/ --/1/89        |
|                                   |                                               | 33  | 27.9/3.7E-07/ +36%/35 | 32.1/7.3E-22/ +76%/75  | 29.7/0.037/ +15%/57    |                        |                       |                       | +42%/31/3/167        |
|                                   |                                               | 50  |                       | 31.5/1.7E-16/ +30%/138 | 30.7/6.4E-35/ +42%/245 | 31.0/6.2E-03/ +25%/68  |                       |                       | <u>+32%/9/3/451</u>  |
|                                   |                                               | 88  |                       | 30.7/4.1E-21/ +68%/99  |                        |                        |                       |                       | +68%/ --/1/99        |
|                                   |                                               | 176 |                       | 27.7/6.5E-13/ +52%/84  |                        |                        |                       |                       | +52%/ --/1/84        |
| <b>Ca2+ Channel</b>               | <b>Cinnarizine</b>                            | 3   |                       | 19.9/0.06/ +10%/43     |                        |                        |                       |                       | +10%/ --/1/43        |
|                                   |                                               | 13  |                       | 19.9/0.02/ +11%/53     |                        |                        |                       |                       | +11%/ --/1/53        |
|                                   |                                               | 33  | 24.1/1.2E-03/ +11%/33 | 20.6/6.6E-05/ +14%/51  | 28.9/8.5E-05/ +16%/57  | 28.7/6.51E-08/ +18%/79 | 26.7/1.8E-04/ +24%/63 | 27.8/0.15/ +8%/62     | <u>+15%/6/6/345</u>  |
|                                   |                                               | 88  |                       | 14.2/0.011/ -21%/49    |                        |                        |                       |                       | -21%/ --/1/49        |
|                                   |                                               | 176 |                       | 9.83/6.8E-12/ -45%/46  |                        |                        |                       |                       | -45%/ --/1/46        |
| <b>Ca2+ Channel</b>               | <b>Nicardipine hydrochloride</b>              | 3   |                       | 17.9/0.69/0%/36        |                        |                        |                       |                       | +0%/ --/1/36         |
|                                   |                                               | 13  |                       | 19.2/0.23/ +9%/41      |                        |                        |                       |                       | +9%/ --/1/41         |
|                                   |                                               | 33  | 25.4/1.3E-05/ +20%/31 | 20.1/0.47/ +4%/55      |                        |                        |                       |                       | +12%/11/2/86         |
|                                   |                                               | 88  |                       | 20.8/0.12/ +5%/58      |                        |                        |                       |                       | +5%/ --/1/58         |
|                                   |                                               | 176 |                       | 27.2/6.9E-06/ +30%/44  | 27.7/1.2E-08/ +14%/74  | 26.7/6.9E-05/ +24%/67  |                       |                       | <u>+23%/8/3/185</u>  |
| <b>Ca2+ Channel</b>               | <b>Nitrendipine</b>                           | 3   |                       | 17.1/0.75/ -4%/58      |                        |                        |                       |                       | -4%/ --/1/58         |
|                                   |                                               | 13  |                       | 20.1/0.03/ +14%/57     |                        |                        |                       |                       | +14%/ --/1/57        |
|                                   |                                               | 33  | 23.6/5.1E-04/ +12%/42 | 27.2/1.3E-10/ +40%/52  |                        |                        |                       |                       | +26%/20/2/94         |
|                                   |                                               | 88  |                       | 33.3/5.5E-18/ +68%/45  | 27.1/2.6E-04/ +11%/79  | 25.6/5.51E-06/ +18%/91 | 26.8/0.18/ +4%/56     |                       | <u>+25%/29/4/271</u> |
|                                   |                                               | 176 |                       | 25.5/4.2E-04/ +21%/66  |                        |                        |                       |                       | +21%/ --/1/66        |
| <b>Cholinergic</b>                | <b>Hexahydro-sila-difenidol hydrochloride</b> | 3   |                       | 19.8/0.09/ +11%/63     |                        |                        |                       |                       | +11%/ --/1/63        |
|                                   |                                               | 13  |                       | 20.7/0.02/ +17%/58     |                        |                        |                       |                       | +17%/ --/1/58        |
|                                   |                                               | 33  | 24.9/5.4E-04/ +25%/43 | 20.5/0.23/ +6%/55      |                        |                        |                       |                       | +16%/13/2/98         |
|                                   |                                               | 88  |                       | 24.2/8.1E-03/ +22%/45  | 28.8/1.6E-07/ +18%/87  | 24.0/0.04/ +11%/74     | 27.4/0.47/ +7%/70     |                       | <u>+15%/7/4/276</u>  |
|                                   |                                               | 176 |                       | 24.1/0.07/ +15%/64     |                        |                        |                       |                       | +15%/ --/1/64        |
| <b>Cyclic Nucleotides</b>         | <b>BRL 50481</b>                              | 3   |                       | 18.4/0.87/ +2%/52      | 26.3/0.63/ -4%/54      |                        |                       |                       | -1%/4/2/106          |
|                                   |                                               | 13  |                       | 17.7/0.46/0%/51        | 28/0.76/ +2%/48        |                        |                       |                       | +1%/1/2/99           |
|                                   |                                               | 33  | 25.1/0.025/ +26%/27   | 18.4/0.61/ -5%/60      | 26.4/0.94/ -4%/46      |                        |                       |                       | +6%/18/3/133         |
|                                   |                                               | 88  |                       | 22.6/5.31E-04/ +14%/52 | 29.6/0.082/ +8%/49     |                        |                       |                       | +11%/4/2/101         |
|                                   |                                               | 176 |                       | 27.4/1.1E-08/ +31%/46  | 31.0/3.2E-03/ +13%/45  | 28.8/9.3E-10/ +19%/76  | 23.6/1.0E-03/ +9%/67  | 30.9/7.9E-11/ +20%/78 | <u>+18%/8/5/312</u>  |
|                                   |                                               | 331 |                       |                        | 31.0/0.03/ +13%/40     |                        |                       |                       | +13%/ --/1/40        |
|                                   |                                               | 533 |                       |                        | 28.9/0.06/ +6%/50      |                        |                       |                       | +6%/ --/1/50         |

|                      |                                               |     |                       |                       |                       |                       |                       |                       |                      |
|----------------------|-----------------------------------------------|-----|-----------------------|-----------------------|-----------------------|-----------------------|-----------------------|-----------------------|----------------------|
| Cyclic Nucleotides   | Trequinsin hydrochloride                      | 3   |                       | 20.2/0.11/ +13%/58    |                       |                       |                       |                       | +13%/ -/1/58         |
|                      |                                               | 13  |                       | 22.1/3.8E-04/ +25%/43 |                       |                       |                       |                       | +25%/ -/1/43         |
|                      |                                               | 33  | 24.3/2.9E-04/ +14%/52 | 23.6/2.9E-05/ +22%/64 |                       |                       |                       |                       | +18%/6/2/116         |
|                      |                                               | 88  |                       | 27.3/3.5E-09/ +37%/56 | 31.9/6.9E-15/ +31%/76 | 26.0/2.3E-06/ +20%/77 | 31.1/2.9E-09/ +21%/63 |                       | <u>+27%/8/4/272</u>  |
|                      |                                               | 176 |                       | 26.6/1.3E-05/ +27%/56 |                       |                       |                       |                       | +27%/ -/1/56         |
| Cyclic Nucleotides   | Vinpocetine                                   | 3   |                       | 23.9/0.38/ +15%/28    |                       |                       |                       |                       | +15%/ -/1/28         |
|                      |                                               | 13  |                       | 24.8/0.034/ +19%/30   |                       |                       |                       |                       | +19%/ -/1/30         |
|                      |                                               | 33  | 24.4/1.3E-03/ +17%/25 | 25.2/0.03/ +21%/41    | 29.5/1.2E-04/ +19%/48 | 28.0/1.5E-05/ +15%/82 | 22.8/0.5/ +5%/71      | 29.6/5.9E-05/ +15%/71 | <u>+15%/6/6/338</u>  |
|                      |                                               | 88  |                       | 23.5/0.011/ +13%/43   |                       |                       |                       |                       | +13%/ -/1/43         |
|                      |                                               | 176 |                       | 23.5/0.06/ +13%/37    |                       |                       |                       |                       | +13%/ -/1/37         |
| Cytoskeleton and ECM | Vincristine sulfate                           | 3   |                       | 19.3/0.19/ -7%/46     |                       |                       |                       |                       | -7%/ -/1/46          |
|                      |                                               | 13  |                       | 23.5/0.83/ +13%/51    |                       |                       |                       |                       | +13%/ -/1/51         |
|                      |                                               | 33  | 24.8/4.6E-03/ +19%/33 | 22.6/0.8/ +8%/50      | 26.8/0.08/ +8%/64     |                       |                       |                       | +12%/6/3/147         |
|                      |                                               | 88  |                       | 24.7/0.025/ +19%/46   | 29.1/3.6E-04/ +20%/78 | 24.3/0.04/ +13%/63    | 25.1/0.26/ -3%/60     |                       | <u>+12%/11/4/247</u> |
|                      |                                               | 176 |                       | 23.6/0.2/ +13%/41     |                       |                       |                       |                       | +13%/ -/1/41         |
| Glutamate            | AMN082                                        | 3   |                       | 18.1/0.7/ +1%/42      | 30.9/0.04/ +7%/61     |                       |                       |                       | +4%/4/2/103          |
|                      |                                               | 13  |                       | 17.2/0.7/ -3%/64      | 32.6/8.9E-04/ +13%/61 |                       |                       |                       | +5%/11/2/125         |
|                      |                                               | 33  | 24.7/5.0E-07/ +16%/43 | 19.0/0.15/ -2%/55     | 29.8/6.7E-05/ +16%/73 | 29.2/0.8/ +1%/73      |                       |                       | <u>+8%/10/4/244</u>  |
|                      |                                               | 88  |                       | 20.1/0.02/ +1%/62     | 25.4/6.6E-03/ -12%/94 |                       |                       |                       | -6%/9/2/156          |
|                      |                                               | 176 |                       | 16.6/0.04/ -21%/55    | 19.1/2.0E-10/ -34%/80 |                       |                       |                       | -27%/9/2/135         |
| Glutamate            | Eliprodil                                     | 3   |                       | 15.8/6.9E-03/ -11%/71 |                       |                       |                       |                       | -11%/ -/1/71         |
|                      |                                               | 13  |                       | 16.7/0.07/ -6%/59     |                       |                       |                       |                       | -6%/ -/1/59          |
|                      |                                               | 33  | 24.5/0.019/ +17%/43   | 22.6/0.04/ +16%/48    |                       |                       |                       |                       | +16%/1/2/91          |
|                      |                                               | 88  |                       | 25.0/3.7E-04/ +26%/50 | 27.8/0.01/ +14%/66    | 25.7/9.0E-04/ +19%/79 | 27.1/0.29/ +5%/51     |                       | <u>+16%/9/4/246</u>  |
|                      |                                               | 176 |                       | 23.1/0.13/ +10%/48    |                       |                       |                       |                       | +10%/ -/1/48         |
| Hormone              | (R,R)-cis-Diethyl tetrahydro-2,8-chrysenediol | 3   |                       | 20.6/0.09/ +8%/82     |                       |                       |                       |                       | +8%/ -/1/82          |
|                      |                                               | 13  |                       | 19.7/0.49/ +3%/70     |                       |                       |                       |                       | +3%/ -/1/70          |
|                      |                                               | 33  | 23.6/ 0.022/ +13%/26  | 19.1/0.86/ -1%/76     | 27.3/0.26/ +6%/67     | 26.9/0.02/ +8%/46     |                       |                       | <u>+7%/6/4/215</u>   |
|                      |                                               | 88  |                       | 21.5/9.0E-03/ +12%/90 |                       |                       |                       |                       | +12%/ -/1/90         |
|                      |                                               | 176 |                       | 21.5/0.013/ +12%/88   |                       |                       |                       |                       | +12%/ -/1/88         |
| Hormone              | beta-Estradiol                                | 3   |                       | 18.7/0.97/ +4%/45     | 29.0/0.72/ +6%/30     |                       |                       |                       | +5%/1/2/75           |
|                      |                                               | 13  |                       | 20.5/0.03/ +16%/62    | 28.9/0.8/ +6%/36      |                       |                       |                       | +11%/7/2/98          |
|                      |                                               | 33  | 24/0.02/ +19%/39      | 20.8/0.17/ +7%/54     | 31.3/0.029/ +14%/28   | 24.8/0.022/ +2%/96    | 20.9/0.77/ -3%/81     | 26.7/0.07/ +4%/58     | <u>+7%/8/6/356</u>   |
|                      |                                               | 88  |                       | 20.6/0.22/ +4%/62     | 29.5/0.019/ +8%/42    |                       |                       |                       | +6%/3/2/104          |
|                      |                                               | 176 |                       | 25.0/3.9E-03/ +19%/32 | 27.4/0.76/0%/48       |                       |                       |                       | +10%/13/2/80         |

|                 |                                                                         |     |                        |                        |                       |                       |                       |                       |                      |
|-----------------|-------------------------------------------------------------------------|-----|------------------------|------------------------|-----------------------|-----------------------|-----------------------|-----------------------|----------------------|
| Hormone         | Cyproterone acetate                                                     | 3   |                        | 19.2/0.41/ +7%/54      | 27.4/0.91/ +0%/44     |                       |                       |                       | +4%/5/2/98           |
|                 |                                                                         | 13  |                        | 19.6/4.8E-03/ +11%/71  | 28.8/0.019/ +5%/51    |                       |                       |                       | +8%/4/2/122          |
|                 |                                                                         | 33  | 27.4/1.4E-05/ +26%/37  | 26.4/2.3E-07/ +36%/58  | 29.4/0.89/ +7%/42     |                       |                       |                       | <u>+23%/15/3/137</u> |
|                 |                                                                         | 88  |                        | 27.9/1.2E-07/ +41%/50  | 28.8/0.66/ +5%/37     |                       |                       |                       | +23%/25/2/87         |
|                 |                                                                         | 176 |                        | 30.8/6.7E-10/ +46%/67  | 28.0/0.95/ +2%/45     | 29.5/6.6E-07/ +21%/79 | 30.8/7.2E-11/ +42%/59 | 28.5/2.9E-03/ +11%/65 | +24%/19/5/315        |
| Hormone         | Danazol                                                                 | 3   |                        | 17.1/0.36/ -5%/45      |                       |                       |                       |                       | -5%/ -/1/45          |
|                 |                                                                         | 13  |                        | 18.2/0.34/ +3%/34      |                       |                       |                       |                       | +3%/ -/1/34          |
|                 |                                                                         | 33  | 22.12/0.02/ +6%/49     | 24.74/4.3E-05/ +28%/38 | 27.6/3.1E-06/ +13%/65 | 22.5/0.12/ +4%/65     | 29.7/9.9E-04/ +16%/47 |                       | <u>+13%/10/5/264</u> |
|                 |                                                                         | 88  |                        | 22.8/1.4E-04/ +15%/67  |                       |                       |                       |                       | +15%/ -/1/67         |
|                 |                                                                         | 176 |                        | 20.6/0.39/ -2%/51      |                       |                       |                       |                       | -2%/ -/1/51          |
| K+ Channel      | Psora-4                                                                 | 3   |                        | 20.8/1.7E-03/ +16%/48  |                       |                       |                       |                       | +16%/ -/1/48         |
|                 |                                                                         | 13  |                        | 23.8/1.9E-09/ +35%/71  |                       |                       |                       |                       | +35%/ -/1/71         |
|                 |                                                                         | 33  | 27.5/3.6E-07/ +26%/46  | 30.0/7.5E-18/ +55%/62  |                       |                       |                       |                       | +40%/21/2/108        |
|                 |                                                                         | 88  |                        | 32.5/6.6E-17/ +64%/49  | 31.5/1.2E-13/ +30%/74 | 30.2/2.9E-18/ +40%/74 | 34.0/1.4E-18/ +32%/68 |                       | <u>+42%/16/4/265</u> |
|                 |                                                                         | 176 |                        | 33.1/3.1E-17/ +58%/52  |                       |                       |                       |                       | +58%/ -/1/52         |
| K+ Channel      | Quinidine sulfate                                                       | 3   |                        | 20.5/0.03/ +14%/63     |                       |                       |                       |                       | +14%/ -/1/63         |
|                 |                                                                         | 13  |                        | 20.4/0.02/ +16%/51     |                       |                       |                       |                       | +16%/ -/1/51         |
|                 |                                                                         | 33  | 24.2/8.0E-03/ +18%/35  | 22.0/4.4E-03/ +14%/50  | 26.7/5.4E-03/ +10%/80 | 24.6/0.04/ +14%/64    | 26.7/0.4/ +4%/65      |                       | <u>+12%/5/5/294</u>  |
|                 |                                                                         | 88  |                        | 21.3/0.21/ +7%/50      |                       |                       |                       |                       | +7%/ -/1/50          |
|                 |                                                                         | 176 |                        | 22.3/0.19/6%/72        |                       |                       |                       |                       | +6%/1/72             |
| Nitric Oxide    | 4-Phenyl-3-furoxan-carbonitrile                                         | 3   |                        | 21.5/3.4E-03/ +20%/47  |                       |                       |                       |                       | +20%/ -/1/47         |
|                 |                                                                         | 13  |                        | 21.4/2.0E-04/ +21%/59  |                       |                       |                       |                       | +21%/ -/1/59         |
|                 |                                                                         | 33  | 26.3/1.1E-04/ +24%/34  | 21.9/6.4E-03/ +13%/51  |                       |                       |                       |                       | +19%/8/2/85          |
|                 |                                                                         | 88  |                        | 28.1/1.2E-10/ +42%/58  | 30.4/6.7E-08/ +25%/79 | 28.7/1.7E-09/ +33%/74 | 30.9/5.6E-05/ +20%/62 |                       | <u>+30%/10/4/273</u> |
|                 |                                                                         | 176 |                        | 14.0/3.5E-04/ -34%/57  |                       |                       |                       |                       | -34%/ -/1/57         |
| Phosphorylation | 7-Cyclopentyl-5-(4-phenoxy) phenyl-7H-pyrrolo[2,3-d]pyrimidin-4-ylamine | 3   |                        | 18.3/0.8/ +2%/46       |                       |                       |                       |                       | +2%/ -/1/46          |
|                 |                                                                         | 13  |                        | 17.1/0.8/ -3%/52       |                       |                       |                       |                       | -3%/ -/1/52          |
|                 |                                                                         | 33  | 23.8/8.3E-03/ +14%/25  | 22.0/1.3E-03/ +14%/51  | 27.3/5.6E-04/ +6%/64  |                       |                       |                       | <u>+11%/5/3/140</u>  |
|                 |                                                                         | 88  |                        | 21.8/6.7E-04/ +10%/58  |                       |                       |                       |                       | +10%/ -/1/58         |
|                 |                                                                         | 176 |                        | 21.8/0.38/ +4%/48      |                       |                       |                       |                       | +4%/ -/1/48          |
| Phosphorylation | Cyclosporin A                                                           | 3   |                        | 21.2/0.03/ +18%/38     |                       |                       |                       |                       | +18%/ -/1/38         |
|                 |                                                                         | 13  |                        | 20.4/0.01/ +15%/53     |                       |                       |                       |                       | +15%/ -/1/53         |
|                 |                                                                         | 33  | 24.9/9.98E-04/ +14%/41 | 27.0/4.1E-08/ +39%/37  |                       |                       |                       |                       | +27%/18/2/78         |

|                 |                    |     |                        |                        |                       |                       |                       |  |               |
|-----------------|--------------------|-----|------------------------|------------------------|-----------------------|-----------------------|-----------------------|--|---------------|
|                 |                    | 48  |                        | 26.9/4.5E-07/ +24%/72  |                       |                       |                       |  | +24%/ --/1/72 |
|                 |                    | 88  |                        | 27.7/3.7E-10/ +39%/55  | 26.8/0.048/ +10%/64   | 27.3/0.22/ +6%/53     |                       |  | +18%/18/3/172 |
|                 |                    | 176 |                        | 21.8/0.84/ +4%/51      |                       |                       |                       |  | +4%/ --/1/51  |
| Phosphorylation | DAPH               | 3   |                        | 22.8/4.2E-03/ +27%/38  |                       |                       |                       |  | +27%/ --/1/38 |
|                 |                    | 13  |                        | 22.6/6.4E-05/ +28%/48  | 27.6/2.9E-04/ +14%/85 | 25.7/4.3E-03/ +19%/72 | 25.4/0.7/ -1%/63      |  | +15%/12/4/268 |
|                 |                    | 33  | 24.8/2.36E-03/ +14%/47 | 21.4/0.06/ +10%/49     |                       |                       |                       |  | +12%/3/2/96   |
|                 |                    | 88  |                        | 21.1/0.6/ +6%/49       |                       |                       |                       |  | +6%/ --/1/49  |
|                 |                    | 176 |                        | 17.4/1.4E-04/ -17%/55  |                       |                       |                       |  | -17%/--/1/55  |
| Phosphorylation | Kenpaullone        | 3   |                        | 21.9/8.3E-04/ +22%/46  |                       |                       |                       |  | +22%/ --/1/46 |
|                 |                    | 13  |                        | 20.3/5.7E-03/ +15%/56  |                       |                       |                       |  | +15%/ --/1/56 |
|                 |                    | 33  | 25.0/8.76E-06/ +21%/45 | 24.0/1.1E-04/ +24%/46  |                       |                       |                       |  | +23%/2/2/91   |
|                 |                    | 88  |                        | 27.7/2.5E-09/ +40%/49  | 30.3/5.3E-08/ +25%/57 | 29.6/3.0E-11/ +37%/58 | 27.6/4.7E-03/ +7%/54  |  | +27%/15/4/218 |
|                 |                    | 176 |                        | 27.6/1.3E-07/ +32%/55  |                       |                       |                       |  | +32%/ --/1/55 |
| Phosphorylation | LFM-A13            | 3   |                        | 19.4/0.21/ +8%/51      |                       |                       |                       |  | +8%/ --/1/51  |
|                 |                    | 13  |                        | 16.3/0.9/ -8%/62       |                       |                       |                       |  | -8%/ --/1/62  |
|                 |                    | 33  | 25.4/2.5E-05/ +23%/35  | 23.2/1.1E-04/ +19%/45  |                       |                       |                       |  | +21%/3/2/80   |
|                 |                    | 88  |                        | 27.1/1.20E-09/ +37%/55 | 30.9/3.2E-13/ +27%/81 | 28.6/7.8E-12/ +32%/76 | 28.3/0.35/ +10%/54    |  | +27%/12/4/266 |
|                 |                    | 176 |                        | 28/9.4E-06/ +33%/43    |                       |                       |                       |  | +33%/ --/1/43 |
| Phosphorylation | SU 4312            | 3   |                        | 17/0.9/ -5%/47         |                       |                       |                       |  | -5%/ --/1/47  |
|                 |                    | 13  |                        | 21.3/3.1E-04/ +20%/44  |                       |                       |                       |  | +20%/ --/1/44 |
|                 |                    | 33  | 24.6/1.6E-07/ +16%/29  | 20.6/8.4E-03/ +6%/55   |                       |                       |                       |  | +11%/7/2/84   |
|                 |                    | 88  |                        | 25.7/2.7E-06/ +29%/45  | 26.9/1.2E-06/ +11%/74 | 15.3/1.0E-03/ -29%/73 | 28.2/0.01/ +10%/61    |  | +5%/24/4/253  |
|                 |                    | 176 |                        | 23.42/2.9E-03/ +12%/50 |                       |                       |                       |  | +12%/ --/1/50 |
| Phosphorylation | Tyrphostin AG 1478 | 3   |                        | 23.0/2.6E-03/ +28%/43  |                       |                       |                       |  | +28%/ --/1/43 |
|                 |                    | 13  |                        | 20.5/0.09/ +16%/55     |                       |                       |                       |  | +16%/ --/1/55 |
|                 |                    | 33  | 21.8/0.01/ +3%/36      | 23.2/5.9E-04/ +19%/54  | 30.0/1.3E-08/ +23%/70 | 20.1/0.7/ -7%/87      | 29.8/1.3E-03/ +16%/59 |  | +11%/12/5/306 |
|                 |                    | 88  |                        | 22.7/1.8E-03/ +14%/50  |                       |                       |                       |  | +14%/ --/1/50 |
|                 |                    | 176 |                        | 20.2/0.96/ -4%/57      |                       |                       |                       |  | -4%/ --/1/57  |

**Supplementary Table 3.**  
**Summary of stress resistance experiments in *C. elegans***

| Class                                                            | Compound name            | Conc. [uM]         | Live animals (%) (expt. 1) | Live animals (%) (expt. 2) | Live animals (%) (expt. 3) | Live animals (%) (expt. 4) | Mean % of animals alive (4 expts)* | S.D., % animals alive (4 expts) | No. wells | No. animals | Mean % of animals alive (all)** |      |
|------------------------------------------------------------------|--------------------------|--------------------|----------------------------|----------------------------|----------------------------|----------------------------|------------------------------------|---------------------------------|-----------|-------------|---------------------------------|------|
| Antibiotic                                                       | Demeclocycline           | 33                 | 62.7                       | 52.5                       | 45.9                       | 63.4                       | 56.9                               | 19.7                            | 26        | 236         | 54.7                            |      |
|                                                                  | Doxycycline              | 33                 | 49.7                       | 61.2                       | 54.9                       | 66.3                       | 57.6                               | 21.6                            | 26        | 231         | 60.2                            |      |
|                                                                  | Minocycline              | 88                 | 15.8                       | 45.4                       | 35.0                       | 11.4                       | 26.4                               | 22.8                            | 26        | 252         | 24.2                            |      |
| Biochemistry                                                     | 3,4-Dichloroisocoumarin  | 88                 | 53.9                       | 51.4                       | 43.9                       | 62.1                       | 53.2                               | 14.9                            | 26        | 251         | 51.8                            |      |
| Biogenic Amine /Adrenoceptor                                     | Amoxapine                | 88                 | 74.7                       | 87.1                       | 75.5                       | 69.9                       | 77.1                               | 17.7                            | 26        | 249         | 78.3                            |      |
|                                                                  | Doxazosin                | 33                 | 44.6                       | 45.8                       | 49.6                       | 29.6                       | 42.4                               | 24.6                            | 26        | 236         | 41.5                            |      |
|                                                                  | Guanabenz                | 88                 | 52.3                       | 54.4                       | 42.7                       | 61.2                       | 53.1                               | 20.7                            | 26        | 235         | 51.5                            |      |
|                                                                  | Guanfacine               | 13                 | 58.0                       | 48.1                       | 50.4                       | 43.7                       | 50.6                               | 21.3                            | 26        | 242         | 50.4                            |      |
|                                                                  | Naftopidil               | 33                 | 55.5                       | 45.9                       | 45.1                       | 64.7                       | 53.1                               | 20.1                            | 26        | 224         | 52.2                            |      |
|                                                                  | Nortriptyline            | 88                 | 58.2                       | 72.9                       | 51.7                       | 77.8                       | 65.4                               | 16.7                            | 26        | 230         | 64.8                            |      |
|                                                                  | Biogenic Amine /Dopamine | (±)-Octoclotheptin | 13                         | 80.6                       | 84.7                       | 74.7                       | 89.0                               | 82.5                            | 14.2      | 26          | 284                             | 83.1 |
|                                                                  |                          | BTCP               | 88                         | 37.5                       | 57.5                       | 50.5                       | 63.6                               | 51.4                            | 20.1      | 26          | 255                             | 49.0 |
| Chlorprothixene                                                  |                          | 13                 | 74.7                       | 90.7                       | 58.9                       | 69.0                       | 74.7                               | 20.2                            | 26        | 269         | 76.2                            |      |
| cis-(Z)-Flupenthixol                                             |                          | 33                 | 64.4                       | 80.1                       | 71.8                       | 84.7                       | 74.7                               | 17.8                            | 26        | 249         | 76.3                            |      |
| Cortexolone                                                      |                          | 33                 | 59.4                       | 18.3                       | 22.7                       | 34.5                       | 34.2                               | 21.6                            | 31        | 301         | 32.9                            |      |
| Dihydroergocristine                                              |                          | 176                | 59.1                       | 83.5                       | 57.9                       | 68.0                       | 67.5                               | 21.6                            | 26        | 270         | 69.3                            |      |
| Loxapine                                                         |                          | 88                 | 71.5                       | 91.7                       | 70.6                       | 85.6                       | 80                                 | 16.8                            | 26        | 255         | 79.2                            |      |
| Methylergonovine maleate                                         |                          | 88                 | 79.2                       | 91.1                       | 78.6                       | 69.5                       | 80.1                               | 11.1                            | 26        | 240         | 82.1                            |      |
| N-(2-[4-(4-Chlorophenyl)piperazin-1-yl]ethyl)-3-methoxybenzamide |                          | 33                 | 87.5                       | 82.4                       | 80.0                       | 71.2                       | 80.9                               | 13.4                            | 26        | 240         | 80.0                            |      |
| Pergolide                                                        |                          | 13                 | 74.1                       | 82.7                       | 82.2                       | 73.2                       | 77.8                               | 12.6                            | 26        | 281         | 78.6                            |      |
| Biogenic Amine /Histamine                                        | Propionylpromazine       | 33                 | 61.3                       | 61.6                       | 91.7                       | 73.8                       | 70.1                               | 18.8                            | 26        | 297         | 70.7                            |      |
|                                                                  | Thioridazine             | 33                 | 54.8                       | 56.6                       | 26.2                       | 69.0                       | 51.4                               | 23.9                            | 30        | 258         | 50.8                            |      |
|                                                                  | Loratadine               | 33                 | 59.5                       | 40.1                       | 55.1                       | 64.4                       | 54.6                               | 18.1                            | 26        | 257         | 56.0                            |      |
|                                                                  | Oxatomide                | 88                 | 56.5                       | 61.5                       | 72.5                       | 79.0                       | 66.1                               | 19.9                            | 26        | 252         | 67.9                            |      |
| Biogenic Amine /Serotonin                                        | Promethazine             | 176                | 65.7                       | 78.9                       | 67.1                       | 79.8                       | 72.8                               | 16                              | 26        | 250         | 72.1                            |      |
|                                                                  | Amperozide               | 13                 | 62.7                       | 63.4                       | 66.4                       | 55.3                       | 61.9                               | 14.2                            | 26        | 260         | 63.8                            |      |
|                                                                  | BRL 15572                | 33                 | 50.7                       | 41.1                       | 42.3                       | 45.4                       | 45.3                               | 20.1                            | 26        | 232         | 45.7                            |      |
|                                                                  | Dihydroergotamine        | 88                 | 61.8                       | 70.4                       | 68.3                       | 75.2                       | 68.5                               | 18.4                            | 26        | 245         | 67.3                            |      |
|                                                                  | Ketanserin               | 176                | 51.0                       | 68.2                       | 42.8                       | 64.6                       | 57.2                               | 17.9                            | 26        | 254         | 55.5                            |      |
|                                                                  | LY-165,163               | 33                 | 63.1                       | 80.6                       | 86.3                       | 40.8                       | 67.1                               | 23.9                            | 26        | 244         | 73.0                            |      |
|                                                                  | LY-367,265               | 33                 | 70.9                       | 77.5                       | 73.3                       | 69.6                       | 72.8                               | 15.7                            | 26        | 284         | 72.9                            |      |
|                                                                  | Metergoline              | 33                 | 58.3                       | 61.5                       | 75.7                       | 61.2                       | 63.2                               | 18.3                            | 26        | 250         | 65.6                            |      |
|                                                                  | Mianserin                | 33                 | 48.5                       | 85.7                       | 63.5                       | 74.2                       | 67.3                               | 21.8                            | 26        | 239         | 70.3                            |      |
| Ca2+ Channel                                                     | Cinnarizine              | 33                 | 51.5                       | 32.3                       | 39.6                       | 51.3                       | 44                                 | 20.9                            | 26        | 290         | 43.1                            |      |
|                                                                  | Nicardipine              | 33                 | .                          | .                          | 44.3                       | 24.9                       | 35.3                               | 17.1                            | 15        | 161         | 33.5                            |      |

|                      |                                                                       |     |      |      |      |      |      |      |     |      |      |
|----------------------|-----------------------------------------------------------------------|-----|------|------|------|------|------|------|-----|------|------|
|                      | Nitrendipine                                                          | 88  | 63.9 | 84.9 | 37.5 | 20.1 | 54.4 | 32   | 26  | 219  | 55.3 |
| Cholinergic          | Hexahydro-sila-difenidol                                              | 88  | 63.2 | 40.0 | 30.5 | 63.9 | 50.8 | 17.1 | 26  | 233  | 48.5 |
| Cyclic Nucleotide    | BRL 50481                                                             | 176 | 41.7 | 42.7 | 27.6 | 47.5 | 40.6 | 15.3 | 26  | 245  | 40.0 |
|                      | Trequinsin                                                            | 88  | 45.1 | 59.5 | 82.4 | 80.0 | 64.2 | 20.2 | 26  | 269  | 65.4 |
|                      | Vinpocetine                                                           | 33  | 40.1 | 29.9 | 24.8 | 53.8 | 37.6 | 18.7 | 26  | 245  | 38.8 |
| Cytoskeleton and ECM | Vincristine                                                           | 88  | 49.1 | 53.2 | 18.8 | 48.7 | 44.3 | 21.4 | 26  | 261  | 45.2 |
| Glutamate            | AMN082                                                                | 33  | 56.0 | 45.8 | 25.7 | 59.7 | 48.3 | 23.5 | 26  | 234  | 47.0 |
|                      | Eliprodiol                                                            | 88  | 68.7 | 51.2 | 51.7 | 74.3 | 62   | 19.6 | 26  | 252  | 59.9 |
| Hormone              | (R,R)-cis-Diethyltetrahydro-2,8-chrysenediol                          | 88  | 33.7 | 23.3 | 64.6 | 67.5 | 44.6 | 27.3 | 26  | 233  | 40.3 |
|                      | beta-Estradiol                                                        | 33  | 58.4 | 36.6 | 37.9 | 59.1 | 48.7 | 22.8 | 26  | 250  | 44.4 |
|                      | Cyproterone                                                           | 176 | 46.5 | 55.1 | 8.2  | 19.5 | 35.2 | 25   | 26  | 255  | 36.9 |
|                      | Danazol                                                               | 33  | 52.2 | 32.0 | 24.2 | 46.5 | 40.1 | 20.6 | 26  | 238  | 39.1 |
| K+ Channel           | Psora-4                                                               | 88  | 35.2 | 27.6 | 29.5 | 28.2 | 30.5 | 13.8 | 26  | 248  | 31.0 |
|                      | Quinidine sulfate                                                     | 33  | 64.1 | 27.1 | 51.6 | 41.6 | 46.5 | 21.8 | 26  | 218  | 45.9 |
| Nitric Oxide         | 4-Phenyl-3-furoxanarbonitrile                                         | 88  | 37.3 | 64.6 | 35.6 | 21.3 | 40.6 | 21.2 | 26  | 224  | 41.5 |
| Phosphorylation      | 7-Cyclopentyl-5-(4-phenoxyphenyl)-7H-pyrrolo[2,3-d]pyrimidin-4-ylamin | 33  | 55.8 | 44.1 | 28.0 | 41.0 | 43.9 | 22.9 | 26  | 245  | 42.8 |
|                      | Cyclosporin A                                                         | 88  | 42.3 | 65.8 | 39.6 | 73.4 | 55.3 | 23.2 | 26  | 241  | 56.8 |
|                      | DAPH                                                                  | 13  | 60.6 | 47.1 | 60.6 | 72.3 | 59.7 | 19.7 | 26  | 258  | 57.0 |
|                      | Kenpauillone                                                          | 88  | 27.0 | 30.2 | 24.4 | 32.9 | 28.7 | 19.4 | 26  | 244  | 27.5 |
|                      | LFM-A13                                                               | 88  | 0.0  | 27.1 | 21.7 | 22.8 | 16.7 | 16.6 | 26  | 209  | 15.8 |
|                      | SU 4312                                                               | 88  | 37.6 | 58.2 | 41.6 | 60.8 | 49.3 | 20.9 | 26  | 237  | 50.6 |
|                      | Tyrphostin AG 1478                                                    | 33  | 47.8 | 41.2 | 48.9 | 62.5 | 49.6 | 18.4 | 26  | 231  | 48.1 |
| CONTROL              | DMSO                                                                  | 0   | 47.7 | 32.7 | 37.9 | 44.0 | 40.9 | 19.5 | 361 | 3452 | 39.8 |

The mean % of animals alive was calculated in two different ways:

\* **Mean % of animals alive (4 expts):** Mean % survival calculated by averaging the mean survival determined in 4 different experiments.

\*\***Mean % of animals alive (all)\*\*:** Mean % survival calculated by pooling all the animals across experiments and dividing the surviving animals by the number of total animals. This number was used to calculate OSR (%) in table 1.

**Supplementary Table 4.**  
**Summary of compound screening data and subsequent analyses**

| <b>Category</b>           | <b>Parameter</b>                                                                                                                                                    | <b>Description</b>                                                                                                                                                                                                          |
|---------------------------|---------------------------------------------------------------------------------------------------------------------------------------------------------------------|-----------------------------------------------------------------------------------------------------------------------------------------------------------------------------------------------------------------------------|
| <b>Assay</b>              | Type of assay                                                                                                                                                       | Lifespan                                                                                                                                                                                                                    |
|                           | Target                                                                                                                                                              | None, phenotype-based compound screen                                                                                                                                                                                       |
|                           | Measurement                                                                                                                                                         | Length of life in days                                                                                                                                                                                                      |
|                           | Assay protocol                                                                                                                                                      | doi: 10.3791/2496                                                                                                                                                                                                           |
| <b>Library</b>            | Library size                                                                                                                                                        | 1280 compounds, LOPAC library                                                                                                                                                                                               |
|                           | Library composition                                                                                                                                                 | 55 pharmacological classes                                                                                                                                                                                                  |
|                           | Source                                                                                                                                                              | Sigma                                                                                                                                                                                                                       |
|                           | Additional comments                                                                                                                                                 | Five of the original 60 classes were removed from the library annotation                                                                                                                                                    |
| <b>Screen</b>             | Format                                                                                                                                                              | 96-well                                                                                                                                                                                                                     |
|                           | Concentration(s) tested                                                                                                                                             | 33 uM                                                                                                                                                                                                                       |
|                           | Plate controls                                                                                                                                                      | DMSO, 0.33%                                                                                                                                                                                                                 |
|                           | Reagent/ compound dispensing system                                                                                                                                 | Hydra                                                                                                                                                                                                                       |
|                           | Detection instrument and software                                                                                                                                   | Microscopy, by eye                                                                                                                                                                                                          |
|                           | Assay validation/QC                                                                                                                                                 | Reference screen, parametric model                                                                                                                                                                                          |
|                           | Correction factors                                                                                                                                                  | None                                                                                                                                                                                                                        |
|                           | Normalization                                                                                                                                                       | Relative to DMSO controls in each plate                                                                                                                                                                                     |
| <b>Secondary analysis</b> | Additional comments                                                                                                                                                 | Lifespan data are not normally distributed, Z'-score does not apply. All primary data from the screen can be found in Supplementary Table 1                                                                                 |
|                           | Hit criteria                                                                                                                                                        | Lifespan extension by 1% or more, FDR<0.66, P<0.05 to at least two adjacent concentrations in dose response experiments. All the primary data from the follow up lifespan experiments can be found in Supplementary Table 2 |
|                           | Hit rate                                                                                                                                                            | 4.7%* (see comments)                                                                                                                                                                                                        |
|                           | Additional assay(s)                                                                                                                                                 | Oxidative stress resistance in <i>C.elegans</i>                                                                                                                                                                             |
|                           | Confirmation of hit purity and structure                                                                                                                            | For each hit, an independent vial was purchased from Sigma or a different supplier and retested                                                                                                                             |
| Additional comments       | The high hit rate is likely caused by the libraries high representation of biologically active compounds and multiple compounds targeting some mammalian proteins.. |                                                                                                                                                                                                                             |

**Total numbers:**

No. of *C.elegans* animals tested in lifespan assays: 126,681  
 No. of *C.elegans* animals tested in stress resistance assays: 17,257

**Lifespan Screen:**

These numbers represent the data set collected for the LOPAC lifespan screen.

No. of compounds tested: 1280  
 Pharmacological classes tested: 55  
 Concentration tested: 33 uM  
 Solvent: DMSO  
 Final DMSO conc.: 0.33%  
 Compounds added at: day 1 of adulthood  
 Total no. of animals: 60,921  
 No. of animals that died: 59,783 (98.1% of total)

|                                      |                                      |
|--------------------------------------|--------------------------------------|
| Mean No. of animals/compound         | 41 +/- 7 animals (min: 30m, max: 58) |
| No. of DMSO control animals:         | 5026                                 |
| No. of DMSO control populations:     | 128 (5026 animals total)             |
| No. of compound treated populations: | 1280                                 |
| Mean lifespan of control:            | 21.1 +/- 0.7 days                    |
| Criteria of a primary hit:           | % change>1% , P<0.05, FDR<0.66       |
| Primary hits:                        | 156                                  |

### **Reference Screen:**

To experimentally determine sensitivity and selectivity of the screen a reference screen comprising of 128 populations was conducted. One researcher treated selected a number of populations (6) and treated them with the lifespan extending compound mianserin instead of DMSO. The number and locations of the mianserin treated populations was unknown to the researcher conducting the reference screen.

|                                 |                       |
|---------------------------------|-----------------------|
| No of compounds tested:         | Mianserin             |
| Pharmacological classes tested: | --                    |
| Concentration tested:           | 33 uM                 |
| Solvent:                        | DMSO                  |
| Final DMSO conc.:               | 0.33%                 |
| Compounds added at:             | day 1 of adulthood    |
| Total no. of animals:           | 4994                  |
| No. of animals that died:       | 4899 (98.1% of total) |

|                                       |                                            |
|---------------------------------------|--------------------------------------------|
| Mean No. of animals/ compound:        | 39.02 +/-6.6                               |
| No. of DMSO control populations:      | 122 (4759 animals total)                   |
| No. of Mianserin treated populations: | 6 (235 animals total)                      |
| No. of Ref. screen populations:       | 128                                        |
| Mean lifespan of control:             | 21.1 +/- 2.3 days                          |
| Criteria of a hit:                    | % change>1% in lifespan , P<0.05, FDR<0.66 |
| True positives:                       | 6                                          |
| False positives:                      | 2                                          |

### **Post-screen lifespan assays, secondary testing:**

|                           |                          |
|---------------------------|--------------------------|
| No. of compounds tested:  | 156 primary hits         |
| Concentration tested:     | 3, 10, 33, 88 and 176 uM |
| Solvent:                  | DMSO                     |
| Final DMSO conc.:         | 0.33%                    |
| Compounds added on:       | day 1 of adulthood       |
| Total no. of animals:     | 65,760                   |
| No. of animals that died: | 64,437 (97.9% of total)  |

### **Oxidative-stress resistance in *C.elegans*:**

|                                 |                                                |
|---------------------------------|------------------------------------------------|
| No of compounds tested:         | 57                                             |
| Pharmacological classes tested: | 15                                             |
| Concentration tested:           | optimized concentration for lifespan extension |
| Solvent:                        | DMSO                                           |
| Final DMSO conc.:               | 0.33%                                          |
| Compounds added at:             | day 1, paraquat added on day 5 (100mM final)   |



|                                      |                                         |
|--------------------------------------|-----------------------------------------|
| Total no. of animals:                | 17,257                                  |
| Mean No of animals/compound:         | 247 +/- 23 animals (min: 161, max: 301) |
| No. of DMSO control animals:         | 3452                                    |
| No. of DMSO control populations:     | 361                                     |
| No. of compound treated populations: | 1451                                    |
